# Supplementary material for: Nasal Microbiota and Infectious Complications After Elective Surgical Procedures
Source: PubMed Central journal article supplement (PMC8085724; doi:10.1001/jamanetworkopen.2021.8386), 2021-04-29
Supplement: jamanetwopen-e218386-s001.pdf [file jamanetwopen-e218386-s001.pdf]

## Supplemental Online Content

Hsiao CJ, Paulson JN, Singh S, et al. Nasal microbiota and infectious complications after elective surgical procedures. *JAMA Netw Open*. 2021;4(4):e218386  
doi:10.1001/jamanetworkopen.2021.8386

**eAppendix.** Supplemental Methods

### **eReferences**

**eTable 1.** Association of Taxa Abundance With Microbiome Cluster Class

**eTable 2.** Association of Taxa Abundance With Composite Infectious Outcome

**eTable 3.** Association of Individual Taxa and Cluster Class With Composite Infectious Outcome

**eFigure 1.** Taxonomic Classification of 16S rRNA Gene Sequences Identified From Preoperative Nasal Swabs

**eFigure 2.** Violin Plots of Variance Associated With Microbiome Cluster

**eFigure 3.** Diversity Characterization of Nasal Microbiota by Cluster Class

This supplemental material has been provided by the authors to give readers additional information about their work.

## **eAppendix.** Supplemental Methods

### **Study design, participants, and protocol**

We conducted a nested matched case-control study to investigate the association between nasal microbiota and postoperative infectious complications using participants selected from a prospective cohort study of elective high risk clean surgical procedures. The protocol for subjects enrolled in the prospective surgical cohort study, which served as the parent to the current microbiome study, was previously published<sup>1</sup>. Of the 802 subjects enrolled into the cohort at the Johns Hopkins Hospital or the University of Maryland Medical Center (from 2/1/2007 to 9/30/2014), we identified 53 participants who developed the composite infectious outcome (deep SSI, bacteremia, or pneumonia) within 6 months of the index surgical procedure. We selected non-infected controls to match cases (~3:1) by age (+/- 5 years), sex, and surgical procedure; for some cases, only 2 matches were identified (yielding a total of 144 controls). We targeted a sample size of ~200 cases plus controls given the financial resources available to us to conduct the microbiome analyses. Cases and controls were selected from a prospective surgical cohort because of the high incidence of bacterial disease expression in the weeks immediately following surgery, allowing temporal inference to be drawn regarding characteristics of microbiota in an infection-free state (before surgery) and subsequent development of clinical infection after a high risk exposure (i.e. surgery).

Patients were eligible for inclusion in the original cohort if they were  $\geq 40$  years old and underwent any of the following elective clean surgical procedures: cardiac surgery (coronary artery bypass or valve), vascular surgery (aortic or lower extremity revascularization or open aneurysm repair), spinal fusion, or craniotomy. These surgical procedures were selected because of the relatively high risk for postoperative SSI and pneumonia and because they share a common pathologic basis for SSI, including the type of infecting pathogen, that is, predominantly skin and mucosal flora. Patients were excluded for any of the following: history of immunodeficiency syndrome, autoimmune disease, immunosuppressive medications in the past 6 months (oral corticosteroids  $< 5$  days was allowed if not current at the time of surgery), central venous catheter was inserted before surgery, any infection/antibiotic therapy at the time of surgery (excluding antibiotics for perioperative prophylaxis), or inability to obtain written informed consent. (None of the participants was intubated at baseline.)

Baseline information from all subjects was obtained from in-person interviews and medical chart review. The following data elements, which could potentially confound the relation between the main exposure (i.e. nasal microbiome cluster class) and primary outcome (i.e. composite of postoperative SSI, bacteremia, or pneumonia), were recorded: demographics (age, sex, race), baseline comorbidities, infection or hospitalization in the year prior to surgery, American Society of Anesthesiologists Class, Charlson Comorbidity score, inpatient/outpatient status at time of surgery, and study site (Johns Hopkins Hospital, University of Maryland Medical Center). A previous report in twins indicated that genetic factors contribute to composition of nasal microbiota<sup>2</sup>. Because genetic architecture is known to differ by race, we included race as a demographic variable to adjust for potential confounding between the main exposure (nasal microbiome cluster class) and infectious outcome. Race was self-reported by each participant. The following comorbidities were recorded: obesity (BMI  $\geq 30$  by weight and height recorded at time of surgery), diabetes, hypertension, myocardial infarction, congestive heart failure, peripheral vascular disease, cerebrovascular disease (previous stroke or TIA), chronic obstructive pulmonary disease (COPD), smoking history (past or present), gastric ulcer disease, chronic liver disease, renal failure requiring dialysis, history of cancer (past or in the context of the scheduled surgical procedure). Each comorbidity was dichotomized and recorded as present if endorsed by the patient during the baseline interview or if the comorbidity was

recorded as present in the hospital record admission history and physical. For the diagnoses of diabetes, hypertension, and COPD, the subject also required concurrent treatment with a therapeutic agent for that disease for the comorbidity to be recorded as present; i.e., oral hypoglycemic agent or insulin for diabetes, anti-hypertensive agent for hypertension, inhaled bronchodilator or inhaled steroid for COPD.

### **Identification of *S aureus* from nasal swabs by clinical culture**

Both anterior nares were swabbed with culturettes at the baseline visit before surgery. Swabs were transported to the clinical laboratory and plated to Chromagar *S. aureus* (BD Diagnostics, Sparks, MD) then stored at -80°C for subsequent extraction of bacterial DNA for 16S rRNA gene sequencing (see below). Plates were incubated in the dark at 37°C for a minimum of 20 hours and then reincubated for another 24 hours, if negative. All mauve colonies were confirmed as *S aureus* positive using latex agglutination (Staphaurex Plus; Remel, Lenexa, KS).

### **Main exposure**

We classified each of the 197 participants in this case-control study based solely on features derived from 16S rRNA gene sequencing of the material extracted from each subject's preoperative nasal swab. Nasal microbiome cluster class served as the main exposure. Two critical steps- 16S rRNA gene sequencing followed by unsupervised clustering analysis- were taken to classify nasal microbiota samples independently and agnostic of the baseline covariates and infection case/control status of each participant. A detailed description of these two steps follows below:

#### *Microbiota profiling using 16S rRNA gene sequencing*

Total metagenomic DNA was extracted and isolated from nasal swabs as previously described<sup>3,4</sup>. Briefly, samples were thawed and spun down, the resulting cell pellet was resuspended in 1 ml ice-cold PBS and transferred into Lysing Matrix B tubes (MP Biomedicals, Solon, OH). Bacterial lysis was then performed using two rounds of enzymatic lysis, first with a cocktail composed of lysozyme, mutanolysin, proteinase K, and then with lysostaphin, followed by mechanical lysis using bead beating. The mgDNA was then further purified using the Zymo fecal DNA kit (Zymogen). Negative extraction controls (PBS) were processed in parallel with each extraction to ensure no contaminating DNA was introduced during the DNA extraction process and PCRs. All samples included in our analyses had negative controls.

Microbiota profiling was performed by PCR amplification of the V3V4 hypervariable region of the 16S rRNA gene, followed by sequencing on the Illumina MiSeq 300-bp paired-reads platform (Illumina, San Diego, CA) using procedures previously published<sup>5,6</sup>. Sample barcoding was performed using the dual-indexing strategy for multiplexed sequencing developed at the Institute for Genome Sciences<sup>5,6</sup>. PCRs were set-up in 96-well microtiter plates using the 319F and 806R 16S universal primers, each of which also included a linker sequence required for Illumina sequencing, and also a 12-bp heterogeneity spacer index sequence aimed at minimizing biases associated with low-diversity amplicon sequencing<sup>5,6</sup>. No-template negative controls were processed for each primer pair. The presence of PCR amplicons was confirmed using gel electrophoresis, after which the SequalPrep normalization plate kit (Life Technologies, Inc.) was used for cleanup and normalization before sequencing.

Following sequencing, initial processing of the raw 16S sequences (read pair merging, read trimming and chimera filtering) was performed as previously described<sup>4</sup>. We then used QIIME 1.9.1<sup>7</sup> to generate an open-reference operational taxonomic unit (OTU) matrix and to perform all downstream analyses. In the process, sequence reads were clustered using a 97% similarity cutoff with UCLUST version 1.2.22 and aligned using PyNAST v1.2.2 against a core

Greengenes database vgg\_13\_8<sup>8</sup>. OTUs were assigned a taxonomic annotation using the RDP Classifier v2.0.2<sup>9</sup> and labeled to the most specific known taxonomic level. When taxonomic classification was not possible for a given taxa level, OTUs were labeled as “unclassified”.

#### *Clustering analysis of nasal microbial profiles*

CountClust<sup>10</sup> (R package) was used to assign each sample to a clustering group based on the counts for each taxonomic unit in each sample. CountClust fits a topic mixed membership model to visualize and annotate clusters, extracting the top features driving cluster membership. Grades of membership modeling (GoM) was used to determine the number of clusters that provided best fit to the data. GoM allows each sample to have some proportion of its membership – partial membership – in each cluster. For microbiome data, the partial membership assumption corresponds to each sample having some proportion of its reads from each cluster, and each cluster is characterized by a probability vector of relative taxa expression levels. In our analysis, we used these partial membership weights to assign each sample to a cluster. To determine the optimal number of clusters, we computed log Bayes factor (provided in CountClust) and compared model fit under k=2 to 5 versus a null single cluster model. The log Bayes factor was corrected for the number of parameters fitted in each model. We evaluated the data with k = 2 to 5 and found that k=2 produced the largest Bayes factor. Because sample cluster assignment may differ between different random seeds, despite similar cluster characteristics in feature abundance, we ran CountClust under 100 different random seeds. We chose the random seed that produced the largest Bayes Factors across different random seeds and sample cluster membership.

#### *Primary and secondary outcomes*

The primary outcome was a composite of deep SSI, pneumonia, or bacteremia, as defined by CDC surveillance criteria<sup>11</sup>, occurring within 6 months postoperatively. Bacteremia was defined as the occurrence of one or more positive blood cultures for a pathogenic organism or 2 or more positive cultures at different times for a skin commensal. Secondary outcomes were SSI, pneumonia, and bacteremia separately, the composite outcome at 30 days, and death at 6 months.

Outcomes were ascertained during the 6 month follow-up period after surgery for all participants involved in the original cohort. Follow-up data were obtained from each participant by study team personnel using in-person or phone interview and by review of medical records. Follow-up occurred daily during the inpatient phase of care immediately following the index surgical procedure and then at 30 days and 6 months after the date of surgery. Outpatient follow-up consisted of scripted mail and/or phone surveys. In addition, medical records were obtained from any primary or specialty care visits and for emergency department encounters and hospitalizations that occurred after discharge from the index surgical procedure. All outcomes reported by patients were confirmed from the obtained medical records, and in cases of death, from death certificates and/or autopsy reports. The social security death index was queried for losses to follow-up.

The outcomes for participants in this nested matched case-control study, like all outcomes in the original cohort, were adjudicated by trained research nurses.

#### *Statistical analyses*

Aggregated counts of rRNA sequences to the species level annotation were batch corrected and used for differential abundance analysis. To account for the variability in sequencing depth we performed cumulative sum scaling (CSS)<sup>12</sup>. To identify taxa significantly different between

clusters and accounting for the sparsity inherent to 16S rRNA gene sequencing, we performed differential abundance analysis using a zero-inflated log-normal model as implemented within metagenomeSeq version 1.21.19 (software publically available at [10.18129/B9.bioc.metagenomeSeq](https://github.com/jhsiao999/B9.bioc.metagenomeSeq))<sup>13</sup>. To characterize the within-sample (alpha) diversity, we calculated Shannon's Diversity Index (H). To characterize the between-sample (beta) diversity, we performed Principal Component Analysis on CSS log<sub>2</sub> normalized species abundances.

Generalized linear model (GLM) analyses were performed to determine the factors associated with primary and secondary outcomes, unadjusted and adjusted for potentially confounding covariates. Weighted probability of assignment to microbiome cluster class served as the main exposure. Models were defined using a binomial probability distribution and a logit link function. In a first step, demographic and comorbidities risk factors were tested individually between clusters. In a second step, a propensity score (PS) for cluster assignment was estimated. To estimate the PS, we used multivariable logistic regression analysis that included all of the baseline variables. Inverse probability of treatment weights (IPTW) used the PS to form a weight. The IPTW approach used weights based on the propensity score to create a sample in which the distribution of measured baseline covariates was independent of cluster assignment. The weights were incorporated in the multivariable weighted logistic regression model to predict infectious outcome.

We bootstrapped propensity score analyses by selecting ~70% of the 197 subjects in 500 subsamples, maintaining a fixed ratio of cases to controls in the subsamples (1:2.8). In each subsample, we first selected the case subjects with matched control subjects. We randomly sampled 38 cases in each subsample with replacement and then iteratively sampled matched control subjects for each case subject until the ratio of case vs control subject satisfied our requirement. The number of subjects in each of the 500 subsamples ranged between 122 to 144.

We examined the association of infection with alpha diversity and abundance of individual microbial taxa using logistic regression. Due to skewness in the abundance (count) of microbial taxa, we log transformed counts to approximate normality. Analyses were performed using the R version 3.2.2 (R foundation for Statistical Computing, Vienna, Austria). Statistical significance was set at p-value < 0.05 and all tests were two-sided. Benjamini-Hochberg false discovery procedure was used to correct for multiple comparisons.

#### *Data access*

Github site which contains all scripts to reproduce our analysis.

<https://jhsiao999.github.io/nasalmicrobiome/>

## eReferences

1. Faraday N, Rock P, Lin EE, et al. Past History of Skin Infection and Risk of Surgical Site Infection after Elective Surgery. *Ann. Surg.* May 24 2012.
2. Liu CM, Price LB, Hungate BA, et al. Staphylococcus aureus and the ecology of the nasal microbiome. *Science advances.* Jun 2015;1(5):e1400216.
3. Zupancic ML, Cantarel BL, Liu Z, et al. Analysis of the gut microbiota in the old order Amish and its relation to the metabolic syndrome. *PLoS One.* 2012;7(8):e43052.
4. Roghmann MC, Lydecker AD, Hittle L, et al. Comparison of the Microbiota of Older Adults Living in Nursing Homes and the Community. *mSphere.* Sep-Oct 2017;2(5).
5. Fadrosch DW, Ma B, Gajer P, et al. An improved dual-indexing approach for multiplexed 16S rRNA gene sequencing on the Illumina MiSeq platform. *Microbiome.* Feb 24 2014;2(1):6.
6. Holm JB, Humphrys MS, Robinson CK, et al. Ultrahigh-Throughput Multiplexing and Sequencing of >500-Base-Pair Amplicon Regions on the Illumina HiSeq 2500 Platform. *mSystems.* Jan-Feb 2019;4(1).
7. Caporaso JG, Kuczynski J, Stombaugh J, et al. QIIME allows analysis of high-throughput community sequencing data. *Nature methods.* May 2010;7(5):335-336.
8. DeSantis TZ, Hugenholtz P, Larsen N, et al. Greengenes, a chimera-checked 16S rRNA gene database and workbench compatible with ARB. *Appl. Environ. Microbiol.* Jul 2006;72(7):5069-5072.
9. Wang Q, Garrity GM, Tiedje JM, Cole JR. Naive Bayesian classifier for rapid assignment of rRNA sequences into the new bacterial taxonomy. *Appl. Environ. Microbiol.* Aug 2007;73(16):5261-5267.
10. Dey KK, Hsiao CJ, Stephens M. Visualizing the structure of RNA-seq expression data using grade of membership models. *PLoS genetics.* Mar 2017;13(3):e1006599.
11. A Report from the NNIS System. National Nosocomial Infections Surveillance (NNIS) System Report, data summary from January 1992 through June 2004, issued October 2004. *Am. J. Infect. Control.* 2004;32:470-485.
12. Paulson JN, Stine OC, Bravo HC, Pop M. Differential abundance analysis for microbial marker-gene surveys. *Nature methods.* Dec 2013;10(12):1200-1202.
13. Paulson JN, Olson ND, Braccia DJ, et al. Statistical analysis for sparse high-throughput sequencing. *Biocoductor* 3.10. 2013;DOI: 10.18129/B9.bioc.metagenomeSeq

**eTable 1.** Association of Taxa Abundance With Microbiome Cluster Class

| Taxa                                                                                                        | sa<br>mpl<br>es<br>clu<br>st1 | sa<br>mpl<br>es<br>clu<br>st2 | cou<br>nts<br>clu<br>st1 | co<br>unt<br>s<br>clu<br>st2 | logF<br>C         | se             | p-<br>val<br>ue       | q-<br>val<br>ue       |
|-------------------------------------------------------------------------------------------------------------|-------------------------------|-------------------------------|--------------------------|------------------------------|-------------------|----------------|-----------------------|-----------------------|
| k__Bacteria;p__Actinobacteria;c__Actinobacteria;o__Actinomycetales;f__Mycobacteriaceae;g__Mycobacterium;s__ | 28                            | 11                            | 76                       | 71<br>71                     | 3.63<br>1E+<br>00 | 0.6<br>01<br>6 | 1.5<br>80<br>E-<br>09 | 5.3<br>10<br>E-<br>07 |
| k__Bacteria;p__Proteobacteria;c__Alphaproteobacteria;o__Rhizobiales;f__g__s__                               | 154                           | 30                            | 180<br>8                 | 13<br>82<br>5                | 1.60<br>9E+<br>00 | 0.2<br>86<br>8 | 2.0<br>20<br>E-<br>08 | 3.3<br>90<br>E-<br>06 |
| k__Bacteria;p__Chloroflexi;c__Thermomicrobia;o__JG30-KF-CM45;f__g__s__                                      | 11                            | 9                             | 22                       | 31<br>52                     | 4.09<br>8E+<br>00 | 0.7<br>51<br>4 | 4.9<br>50<br>E-<br>08 | 4.1<br>40<br>E-<br>06 |
| k__Bacteria;p__TM7;c__TM7-1;o__f__g__s__                                                                    | 19                            | 10                            | 46                       | 66<br>05                     | 3.60<br>3E+<br>00 | 0.6<br>58<br>7 | 4.5<br>10<br>E-<br>08 | 4.1<br>40<br>E-<br>06 |
| k__Bacteria;p__Actinobacteria;c__Actinobacteria;o__Actinomycetales;f__g__s__                                | 27                            | 15                            | 84                       | 12<br>09<br>9                | 3.05<br>7E+<br>00 | 0.5<br>65<br>1 | 6.3<br>30<br>E-<br>08 | 4.2<br>40<br>E-<br>06 |
| k__Bacteria;p__Actinobacteria;c__Thermoleophilia;o__Solirubrobacterales;f__g__s__                           | 11                            | 12                            | 19                       | 27<br>49                     | 3.80<br>6E+<br>00 | 0.7<br>12<br>5 | 9.2<br>20<br>E-<br>08 | 4.5<br>50<br>E-<br>06 |
| k__Bacteria;p__Proteobacteria;c__Betaproteobacteria;o__Burkholderiales;f__Oxalobacteraceae;g__s__           | 139                           | 29                            | 292<br>4                 | 10<br>24<br>00               | 1.75<br>6E+<br>00 | 0.3<br>29<br>2 | 9.5<br>20<br>E-<br>08 | 4.5<br>50<br>E-<br>06 |
| k__Bacteria;p__Proteobacteria;c__Betaproteobacteria;o__Burkholderiales;f__Comamonadaceae;g__s__             | 128                           | 29                            | 273<br>7                 | 60<br>88<br>9                | 1.50<br>8E+<br>00 | 0.3<br>13<br>9 | 1.5<br>70<br>E-<br>06 | 6.5<br>50<br>E-<br>05 |
| k__Bacteria;p__Actinobacteria;c__Actinobacteria;o__Actinomycetales;f__Microbacteriaceae;g__s__              | 44                            | 12                            | 214                      | 82<br>41                     | 2.66<br>8E+<br>00 | 0.5<br>64<br>3 | 2.2<br>70<br>E-<br>06 | 8.4<br>40<br>E-<br>05 |
| k__Bacteria;p__Actinobacteria;c__Acidimicrobiia;o__Acidimicrobiales;f__g__s__                               | 12                            | 10                            | 17                       | 11<br>34                     | 3.26<br>6E+<br>00 | 0.7<br>00<br>3 | 3.1<br>00<br>E-<br>06 | 1.0<br>37<br>E-<br>04 |
| k__Bacteria;p__Firmicutes;c__Clostridia;o__Clostridiales;f__Clostridiaceae;g__SMB53;s__                     | 19                            | 11                            | 87                       | 57<br>62                     | 2.96<br>9E+<br>00 | 0.6<br>55<br>3 | 5.8<br>90<br>E-<br>06 | 1.7<br>93<br>E-<br>04 |
| k__Bacteria;p__Firmicutes;c__Clostridia;o__Clostridiales;f__Clostridiaceae;g__s__                           | 16                            | 9                             | 47                       | 29<br>18                     | 3.09<br>9E+<br>00 | 0.6<br>90<br>1 | 7.0<br>90<br>E-<br>06 | 1.9<br>79<br>E-<br>04 |
| k__Bacteria;p__Proteobacteria;c__Alphaproteobacteria;o__Rhodobacterales;f__Rhodobacteraceae;g__s__          | 23                            | 16                            | 285                      | 16<br>48                     | 2.33<br>2E+<br>00 | 0.5<br>39<br>8 | 1.5<br>60<br>E-<br>05 | 4.0<br>21<br>E-<br>04 |
| k__Bacteria;p__TM7;c__TM7-3;o__f__g__s__                                                                    | 49                            | 20                            | 951                      | 29<br>99                     | 1.83<br>2E+<br>00 | 0.4<br>28<br>5 | 1.9<br>20<br>E-<br>05 | 4.5<br>84<br>E-<br>04 |
| k__Bacteria;p__Firmicutes;c__Bacilli;o__Bacillales;f__[Exiguobacteraceae];g__Exiguobacterium;s__            | 41                            | 14                            | 137                      | 29<br>99                     | 2.02<br>4E+<br>00 | 0.4<br>86<br>5 | 3.1<br>80<br>E-<br>05 | 7.1<br>04<br>E-<br>04 |
| k__Bacteria;p__Firmicutes;c__Clostridia;o__Clostridiales;f__[Tissierellaceae];g__Parvimonas;s__             | 28                            | 8                             | 211                      | 75<br>1                      | 2.58<br>9E+<br>00 | 0.6<br>53<br>2 | 7.4<br>10             | 1.5<br>51             |

|                                                                                                               |     |    |       |        |           |       |       |       |      |
|---------------------------------------------------------------------------------------------------------------|-----|----|-------|--------|-----------|-------|-------|-------|------|
|                                                                                                               |     |    |       |        |           |       |       | E-05  | E-03 |
| k_Bacteria;p_Proteobacteria;c_Gammaproteobacteria;o_Legionellales;f_Legionellaceae;g_s                        | 7   | 8  | 8     | 1892   | 3.509E+00 | 0.903 | 1.027 | 1.911 | E-03 |
| k_Bacteria;p_Actinobacteria;c_Actinobacteria;o_Actinomycetales;f_Propionibacteriaceae;g_Propionibacterium;s   | 153 | 21 | 14734 | 662    | 1.646E+00 | 0.423 | 1.022 | 1.911 | E-03 |
| k_Bacteria;p_Proteobacteria;c_Gammaproteobacteria;o_Pseudomonadales;f_Moraxellaceae;g_Moraxella;s             | 46  | 12 | 17486 | 121207 | 3.354E+00 | 0.873 | 1.235 | 2.177 | E-03 |
| k_Bacteria;p_Bacteroidetes;c_Sphingobacteriia;o_Sphingobacteriales;f_Sphingobacteriaceae;g_Sphingobacterium;s | 6   | 8  | 11    | 110    | 3.258E+00 | 0.866 | 1.697 | 2.843 | E-03 |
| k_Bacteria;p_Cyanobacteria;c_Synechococcophycideae;o_Synechococcales;f_Synechococcaceae;g_Synechococcus;s     | 12  | 2  | 26    | 1593   | 4.373E+00 | 1.185 | 2.248 | 3.274 | E-03 |
| k_Bacteria;p_Thermi;c_Deinococci;o_Deinococcales;f_Deinococcaceae;g_Deinococcus;s                             | 27  | 13 | 401   | 37448  | 2.549E+00 | 0.688 | 2.112 | 3.274 | E-03 |
| k_Bacteria;p_Actinobacteria;c_Actinobacteria;o_Actinomycetales;f_Microbacteriaceae;g_Microbacterium;s         | 55  | 18 | 343   | 25345  | 1.697E+00 | 0.459 | 2.221 | 3.274 | E-03 |
| k_Bacteria;p_Proteobacteria;c_Betaproteobacteria;o_Methylophilales;f_Methylophilaceae;g_s                     | 4   | 5  | 4     | 606    | 3.794E+00 | 1.059 | 3.434 | 4.793 | E-03 |
| k_Bacteria;p_Firmicutes;c_Clostridia;o_Clostridiales;f_Lachnospiraceae;g_s                                    | 59  | 20 | 630   | 1329   | 1.512E+00 | 0.424 | 3.659 | 4.903 | E-03 |
| k_Bacteria;p_Acidobacteria;c_[Chloracidobacteria];o_RB41;f_Ellin6075;g_s                                      | 17  | 9  | 151   | 1918   | 2.437E+00 | 0.686 | 3.818 | 4.919 | E-03 |
| k_Bacteria;p_Firmicutes;c_Bacilli;o_Lactobacillales;f_Carnobacteriaceae;g_Granulicatella;s                    | 86  | 16 | 2677  | 14065  | 1.759E+00 | 0.501 | 4.363 | 5.413 | E-03 |
| k_Bacteria;p_TM7;c_SC3;o_f_g_s                                                                                | 10  | 7  | 21    | 3266   | 3.192E+00 | 0.914 | 4.852 | 5.459 | E-03 |
| k_Bacteria;p_Proteobacteria;c_Alphaproteobacteria;o_Rickettsiales;f_g_s                                       | 9   | 6  | 30    | 1105   | 3.100E+00 | 0.884 | 4.574 | 5.459 | E-03 |
| k_Bacteria;p_Actinobacteria;c_Actinobacteria;o_Actinomycetales;f_Actinomycetaceae;g_Actinomyces;s             | 111 | 24 | 3395  | 5006   | 1.310E+00 | 0.375 | 4.889 | 5.459 | E-03 |
| k_Bacteria;p_Firmicutes;c_Clostridia;o_Clostridiales;f_Peptostreptococcaceae;g_Peptostreptococcus;s           | 15  | 6  | 107   | 492    | 2.758E+00 | 0.798 | 5.492 | 5.575 | E-03 |
| k_Bacteria;p_Proteobacteria;c_Alphaproteobacteria;o_Sphingomonadales;f_g_s                                    | 12  | 9  | 34    | 872    | 2.489E+00 | 0.720 | 5.463 | 5.575 | E-03 |
| k_Bacteria;p_Proteobacteria;c_Alphaproteobacteria;o_Sphingomonadales;f_Sphingomonadaceae;g_Novosphingobium;s  | 13  | 11 | 41    | 260    | 2.214E+00 | 0.638 | 5.265 | 5.575 |      |



|                                                                                                                  |     |    |       |       |           |        |           |           |
|------------------------------------------------------------------------------------------------------------------|-----|----|-------|-------|-----------|--------|-----------|-----------|
|                                                                                                                  |     |    |       |       |           |        | E-04      | E-03      |
| k_Bacteria;p_Firmicutes;c_Bacilli;o_Lactobacillales;f_Streptococcaceae;g_Streptococcus;s_                        | 161 | 30 | 36652 | 62811 | 1.137E+00 | 0.3298 | 5.681E-04 | 5.597E-03 |
| k_Bacteria;p_Proteobacteria;c_Alphaproteobacteria;o_Sphingomonadales;f_Sphingomonadaceae;g_;s_                   | 34  | 13 | 157   | 2040  | 1.749E+00 | 0.5109 | 6.178E-04 | 5.914E-03 |
| k_Bacteria;p_Actinobacteria;c_Actinobacteria;o_Bifidobacteriales;f_Bifidobacteriaceae;g_Bifidobacterium;s_longum | 13  | 11 | 65    | 836   | 2.443E+00 | 0.7192 | 6.822E-04 | 6.349E-03 |
| k_Bacteria;p_Proteobacteria;c_Alphaproteobacteria;o_Rhizobiales;f_Hyphomicrobiaceae;g_Hyphomicrobium;s_          | 7   | 10 | 25    | 1637  | 2.930E+00 | 0.8723 | 7.825E-04 | 7.085E-03 |
| k_Bacteria;p_Proteobacteria;c_Alphaproteobacteria;o_Rhodobacterales;f_Rhodobacteraceae;g_Paracoccus;s_marcusii   | 32  | 13 | 85    | 1483  | 1.575E+00 | 0.4708 | 8.227E-04 | 7.253E-03 |
| k_Bacteria;p_Bacteroidetes;c_Cytophagia;o_Cytophagales;f_Cytophagaceae;g_Hymenobacter;s_                         | 23  | 11 | 122   | 15245 | 2.284E+00 | 0.6942 | 1.001E-03 | 8.385E-03 |
| k_Bacteria;p_Actinobacteria;c_Coriobacteriia;o_Coriobacteriales;f_Coriobacteriaceae;g_Atopobium;s_               | 37  | 9  | 204   | 401   | 1.813E+00 | 0.5505 | 9.914E-04 | 8.385E-03 |
| k_Bacteria;p_Proteobacteria;c_Alphaproteobacteria;o_Rhizobiales;f_Methylocystaceae;g_Methylosinus;s_             | 5   | 8  | 5     | 252   | 2.928E+00 | 0.8954 | 1.077E-03 | 8.803E-03 |
| k_Bacteria;p_Proteobacteria;c_Alphaproteobacteria;o_Rhizobiales;f_Bejerinckiaceae;g_;s_                          | 17  | 10 | 68    | 3389  | 2.319E+00 | 0.7123 | 1.131E-03 | 9.024E-03 |
| k_Bacteria;p_Proteobacteria;c_Betaproteobacteria;o_Burkholderiales;f_Alcaligenaceae;g_;s_                        | 25  | 10 | 166   | 1177  | 2.153E+00 | 0.6630 | 1.164E-03 | 9.070E-03 |
| k_Bacteria;p_Actinobacteria;c_Acidimicrobiia;o_Acidimicrobiales;f_EB1017;g_;s_                                   | 3   | 9  | 3     | 172   | 3.320E+00 | 1.0418 | 1.439E-03 | 1.095E-02 |
| k_Bacteria;p_Proteobacteria;c_Alphaproteobacteria;o_Rhizobiales;f_Hyphomicrobiaceae;g_Rhodoplanes;s_             | 12  | 10 | 21    | 259   | 2.004E+00 | 0.6317 | 1.515E-03 | 1.103E-02 |
| k_Bacteria;p_Actinobacteria;c_Actinobacteria;o_Actinomycetales;f_Nocardiodaceae;g_;s_                            | 35  | 13 | 288   | 683   | 1.606E+00 | 0.5061 | 1.506E-03 | 1.103E-02 |
| k_Bacteria;p_Actinobacteria;c_Acidimicrobiia;o_Acidimicrobiales;f_C111;g_;s_                                     | 9   | 8  | 35    | 749   | 2.669E+00 | 0.8510 | 1.712E-03 | 1.220E-02 |
| k_Bacteria;p_Firmicutes;c_Clostridia;o_Clostridiales;f_Veillonellaceae;g_Veillonella;s_dispar                    | 114 | 19 | 7907  | 9307  | 1.299E+00 | 0.4178 | 1.878E-03 | 1.258E-02 |
| k_Bacteria;p_Proteobacteria;c_Alphaproteobacteria;o_Rhizobiales;f_Bradyrhizobiaceae;g_;s_                        | 111 | 27 | 1318  | 969   | 8.217E-01 | 0.2637 | 1.836E-03 | 1.258E-02 |
| k_Bacteria;p_Actinobacteria;c_Actinobacteria;o_Actinomycetales;f_Micrococcaceae;g_Micrococcus;s_                 | 145 | 27 | 466   | 37    | 6.42      | 0.2064 | 1.873     | 1.258     |

|                                                                                                                        |     |    |        |       |            |        |           |           |
|------------------------------------------------------------------------------------------------------------------------|-----|----|--------|-------|------------|--------|-----------|-----------|
|                                                                                                                        |     |    |        |       | 0E-01      |        | E-03      | E-02      |
| k_Bacteria;p_Actinobacteria;c_Actinobacteria;o_Actinomycetales;f_Propionibacteriaceae;g_Propionibacterium;s_granulosum | 154 | 27 | 922    | 73    | -6.364E-01 | 0.2057 | 1.972E-03 | 1.296E-02 |
| k_Bacteria;p_Proteobacteria;c_Gammaproteobacteria;o_Pseudomonadales;f_Moraxellaceae;g_;                                | 67  | 17 | 629    | 16591 | 1.438E+00  | 0.4698 | 2.203E-03 | 1.420E-02 |
| k_Bacteria;p_Actinobacteria;c_Acidimicrobia;o_Acidimicrobiales;f_Microthrixaceae;g_;                                   | 3   | 8  | 3      | 219   | 3.354E+00  | 1.1142 | 2.607E-03 | 1.648E-02 |
| k_Bacteria;p_Firmicutes;c_Bacilli;o_Bacillales;f_Bacillaceae;g_Anoxybacillus;s_kestanbolensis                          | 147 | 27 | 2201   | 108   | -9.320E-01 | 0.3104 | 2.677E-03 | 1.661E-02 |
| k_Bacteria;p_Proteobacteria;c_Gammaproteobacteria;o_Xanthomonadales;f_Xanthomonadaceae;g_Stenotrophomonas;s_           | 145 | 26 | 588    | 47    | -6.092E-01 | 0.2122 | 4.088E-03 | 2.490E-02 |
| k_Bacteria;p_Firmicutes;c_Clostridia;o_Clostridiales;f_[Tissierellaceae];g_Anaerococcus;s_                             | 159 | 27 | 128879 | 9195  | -1.169E+00 | 0.4086 | 4.222E-03 | 2.495E-02 |
| k_Bacteria;p_Proteobacteria;c_Alphaproteobacteria;o_Sphingomonadales;f_Sphingomonadaceae;g_Sphingomonas;s_             | 72  | 19 | 1131   | 9483  | 1.159E+00  | 0.4052 | 4.246E-03 | 2.495E-02 |
| k_Bacteria;p_Firmicutes;c_Bacilli;o_Bacillales;f_;;g_;                                                                 | 66  | 4  | 1648   | 29    | -2.695E+00 | 0.9457 | 4.368E-03 | 2.514E-02 |
| k_Bacteria;p_Proteobacteria;c_Alphaproteobacteria;o_Rhodospirillales;f_Acetobacteraceae;g_;                            | 26  | 10 | 94     | 393   | 1.679E+00  | 0.5899 | 4.429E-03 | 2.514E-02 |
| k_Bacteria;p_Firmicutes;c_Bacilli;o_Bacillales;f_Planococcaceae;g_Paenisporosarcina;s_                                 | 25  | 8  | 79     | 2314  | 1.983E+00  | 0.6992 | 4.575E-03 | 2.554E-02 |
| k_Bacteria;p_Cyanobacteria;c_Chloroplast;o_Chlorophyta;f_Trebouxiophyceae;g_;                                          | 8   | 6  | 28     | 16300 | 3.440E+00  | 1.2225 | 4.897E-03 | 2.689E-02 |
| k_Bacteria;p_Synergistetes;c_Synergistia;o_Synergistales;f_Dethiosulfovibrionaceae;g_TG5;s_                            | 4   | 3  | 26     | 176   | 3.627E+00  | 1.3003 | 5.285E-03 | 2.856E-02 |
| k_Bacteria;p_Proteobacteria;c_Betaproteobacteria;o_Rhodocyclales;f_Rhodocyclaceae;g_;                                  | 17  | 9  | 32     | 388   | 1.872E+00  | 0.6781 | 5.776E-03 | 3.043E-02 |
| k_Bacteria;p_Proteobacteria;c_Alphaproteobacteria;o_Rhodospirillales;f_Rhodospirillaceae;g_;                           | 31  | 14 | 199    | 777   | 1.358E+00  | 0.4924 | 5.814E-03 | 3.043E-02 |
| k_Bacteria;p_Actinobacteria;c_Actinobacteria;o_Actinomycetales;f_Microbacteriaceae;g_CandidatusAquiluna;s_rubra        | 4   | 4  | 9      | 2574  | 3.823E+00  | 1.3900 | 5.959E-03 | 3.071E-02 |
| k_Bacteria;p_Fusobacteria;c_Fusobacteriia;o_Fusobacteriales;f_Fusobacteriaceae;g_Fusobacterium;s_                      | 74  | 15 | 2241   | 1500  | 1.257E+00  | 0.4723 | 7.790E-03 | 3.954E-02 |
| k_Bacteria;p_Chlamydiae;c_Chlamydiia;o_Chlamydiales;f_;;g_;                                                            | 3   | 6  | 3      | 648   | 3.414E+00  | 1.3084 | 9.062     | 4.531     |

|                                                                                                                       |     |    |      |      |            |        |           |           |
|-----------------------------------------------------------------------------------------------------------------------|-----|----|------|------|------------|--------|-----------|-----------|
|                                                                                                                       |     |    |      |      |            |        | E-03      | E-02      |
| k_Bacteria;p_Actinobacteria;c_Actinobacteria;o_Actinomycetales;f_Intrasporangiaceae;g__;s__                           | 38  | 8  | 387  | 5313 | 1.801E+00  | 0.7041 | 1.054E-02 | 5.191E-02 |
| k_Bacteria;p_Bacteroidetes;c_Flavobacteriia;o_Flavobacteriales;f_Flavobacteriaceae;g_Flavobacterium;s__               | 46  | 14 | 482  | 2096 | 1.331E+00  | 0.5282 | 1.174E-02 | 5.701E-02 |
| k_Bacteria;p_Proteobacteria;c_TA18;o_PHOS-HD29;f__;g__;s__                                                            | 2   | 7  | 2    | 112  | 3.215E+00  | 1.2860 | 1.243E-02 | 5.866E-02 |
| k_Bacteria;p_Proteobacteria;c_Alphaproteobacteria;o_Sphingomonadales;f_Sphingomonadaceae;g_Sphingopyxis;s__           | 4   | 9  | 8    | 470  | 2.681E+00  | 1.0713 | 1.231E-02 | 5.866E-02 |
| k_Bacteria;p_Proteobacteria;c_Gammaproteobacteria;o_Aeromonadales;f_Aeromonadaceae;g__;s__                            | 33  | 8  | 191  | 1067 | 1.647E+00  | 0.6655 | 1.333E-02 | 6.203E-02 |
| k_Bacteria;p_Firmicutes;c_Clostridia;o_Clostridiales;f_Lachnospiraceae;g_Moryella;s__                                 | 24  | 7  | 283  | 2262 | 1.974E+00  | 0.8009 | 1.370E-02 | 6.287E-02 |
| k_Bacteria;p_TM6;c_SJA-4;o__;f__;g__;s__                                                                              | 2   | 6  | 2    | 1458 | 3.891E+00  | 1.5907 | 1.444E-02 | 6.521E-02 |
| k_Bacteria;p_TM7;c__;o__;f__;g__;s__                                                                                  | 6   | 7  | 16   | 2793 | 2.609E+00  | 1.0727 | 1.499E-02 | 6.521E-02 |
| k_Bacteria;p_Firmicutes;c_Erysipelotrichi;o_Erysipelotrichales;f_Erysipelotrichaceae;g_Bulleidia;s__                  | 8   | 7  | 53   | 755  | 2.463E+00  | 1.0118 | 1.494E-02 | 6.521E-02 |
| k_Bacteria;p_Cyanobacteria;c_Chloroplast;o_Stramenopiles;f__;g__;s__                                                  | 8   | 7  | 54   | 1063 | 2.393E+00  | 0.9823 | 1.485E-02 | 6.521E-02 |
| k_Bacteria;p_Proteobacteria;c_Alphaproteobacteria;o_Caulobacterales;f_Caulobacteraceae;g__;s__                        | 112 | 26 | 1968 | 1393 | 8.153E-01  | 0.3371 | 1.559E-02 | 6.696E-02 |
| k_Bacteria;p_Firmicutes;c_Clostridia;o_Clostridiales;f_Lachnospiraceae;g_Oribacterium;s__                             | 21  | 9  | 134  | 1226 | 1.787E+00  | 0.7405 | 1.582E-02 | 6.707E-02 |
| k_Bacteria;p_Firmicutes;c_Clostridia;o_Clostridiales;f_Ruminococcaceae;g_Ruminococcus;s__                             | 28  | 8  | 453  | 27   | -1.629E+00 | 0.6947 | 1.904E-02 | 7.974E-02 |
| k_Bacteria;p_Proteobacteria;c_Alphaproteobacteria;o_Rhizobiales;f_Rhizobiaceae;g_Agrobacterium;s__                    | 42  | 12 | 325  | 856  | 1.243E+00  | 0.5335 | 1.979E-02 | 7.988E-02 |
| k_Bacteria;p_Bacteroidetes;c_Bacteroidia;o_Bacteroidales;f_Prevotellaceae;g_Prevotella;s_melaninogenica               | 80  | 16 | 2634 | 9623 | 1.133E+00  | 0.4858 | 1.975E-02 | 7.988E-02 |
| k_Bacteria;p_Proteobacteria;c_Gammaproteobacteria;o_Pseudomonadales;f_Pseudomonadaceae;g__;s__                        | 144 | 25 | 334  | 41   | -4.812E-01 | 0.2062 | 1.963E-02 | 7.988E-02 |
| k_Bacteria;p_Proteobacteria;c_Gammaproteobacteria;o_Xanthomonadales;f_Xanthomonadaceae;g_Pseudoxanthomonas;s_mexicana | 3   | 3  | 4    | 164  | 3.242E+00  | 1.4001 | 2.058     | 8.151     |

|                                                                                                                   |     |    |      |      |            |        |           |           |
|-------------------------------------------------------------------------------------------------------------------|-----|----|------|------|------------|--------|-----------|-----------|
|                                                                                                                   |     |    |      |      |            |        | E-02      | E-02      |
| k_Bacteria;p_Fusobacteria;c_Fusobacteriia;o_Fusobacteriales;f_Leptotrichiaceae;g_Leptotrichia;s__                 | 73  | 20 | 2445 | 4266 | 1.107E+00  | 0.4786 | 2.068E-02 | 8.151E-02 |
| k_Bacteria;p_Cyanobacteria;c_Chloroplast;o_Chlorophyta;f_g__;s__                                                  | 3   | 4  | 7    | 1523 | 3.435E+00  | 1.4974 | 2.180E-02 | 8.490E-02 |
| k_Bacteria;p_Proteobacteria;c_Alphaproteobacteria;o_Rhizobiales;f_Phyllobacteriaceae;g__;s__                      | 16  | 9  | 68   | 137  | 1.473E+00  | 0.6459 | 2.256E-02 | 8.590E-02 |
| k_Bacteria;p_Firmicutes;c_Bacilli;o_Gemellales;f_Gemellaceae;g__;s__                                              | 64  | 14 | 1204 | 2580 | 1.128E+00  | 0.4946 | 2.256E-02 | 8.590E-02 |
| k_Bacteria;p_Bacteroidetes;c_Sphingobacteriia;o_Sphingobacteriales;f_Sphingobacteriaceae;g_Pedobacter;s__         | 60  | 16 | 668  | 9667 | 1.061E+00  | 0.4674 | 2.327E-02 | 8.757E-02 |
| k_Bacteria;p_Bacteroidetes;c_Sphingobacteriia;o_Sphingobacteriales;f_Sphingobacteriaceae;g__;s__                  | 5   | 7  | 77   | 913  | 2.334E+00  | 1.0395 | 2.476E-02 | 9.215E-02 |
| k_Bacteria;p_Proteobacteria;c_Betaproteobacteria;o_Burkholderiales;f_Oxalobacteraceae;g_Janthinobacterium;s__     | 23  | 8  | 70   | 754  | 1.551E+00  | 0.6946 | 2.557E-02 | 9.415E-02 |
| k_Bacteria;p_[Thermi];c_Deinococci;o_Deinococcales;f_Trueperaceae;g_Truepera;s__                                  | 7   | 5  | 46   | 466  | 2.367E+00  | 1.0641 | 2.615E-02 | 9.521E-02 |
| k_Bacteria;p_Firmicutes;c_Clostridia;o_Clostridiales;f_Ruminococcaceae;g__;s__                                    | 38  | 14 | 428  | 328  | 1.165E+00  | 0.5261 | 2.682E-02 | 9.659E-02 |
| k_Bacteria;p_Actinobacteria;c_Actinobacteria;o_Actinomycetales;f_Nocardiodaceae;g_Aeromicrobium;s__               | 2   | 5  | 4    | 136  | 3.118E+00  | 1.4196 | 2.805E-02 | 9.811E-02 |
| k_Bacteria;p_Firmicutes;c_Bacilli;o_Turicibacteriales;f_Turicibacteraceae;g_Turicibacter;s__                      | 7   | 9  | 65   | 497  | 1.827E+00  | 0.8321 | 2.811E-02 | 9.811E-02 |
| k_Bacteria;p_Actinobacteria;c_Coriobacteriia;o_Coriobacteriales;f_Coriobacteriaceae;g__;s__                       | 32  | 12 | 233  | 458  | 1.249E+00  | 0.5682 | 2.791E-02 | 9.811E-02 |
| k_Bacteria;p_TM6;c_F38;o__;f__;g__;s__                                                                            | 3   | 6  | 3    | 540  | 2.789E+00  | 1.2838 | 2.982E-02 | 1.030E-01 |
| k_Bacteria;p_Proteobacteria;c_Alphaproteobacteria;o_Rhodobacterales;f_Rhodobacteraceae;g_Paracoccus;s_aminovorans | 144 | 28 | 272  | 49   | -4.016E-01 | 0.1856 | 3.044E-02 | 1.041E-01 |
| k_Bacteria;p_Proteobacteria;c_Alphaproteobacteria;o_Rhodospirillales;f_Acetobacteraceae;g_Roseomonas;s_mucosa     | 14  | 2  | 201  | 8    | -2.809E+00 | 1.3054 | 3.139E-02 | 1.062E-01 |
| k_Bacteria;p_Actinobacteria;c_Actinobacteria;o_Actinomycetales;f_Geodermatophilaceae;g__;s__                      | 28  | 8  | 159  | 187  | 1.385E+00  | 0.6458 | 3.197E-02 | 1.071E-01 |
| k_Bacteria;p_Proteobacteria;c_Alphaproteobacteria;o_Rhodospirillales;f__;g__;s__                                  | 2   | 5  | 3    | 184  | 3.030E+00  | 1.4191 | 3.277E-02 | 1.076E-01 |

|                                                                                                             |     |    |      |       |            |        |           |           |
|-------------------------------------------------------------------------------------------------------------|-----|----|------|-------|------------|--------|-----------|-----------|
|                                                                                                             |     |    |      |       |            |        | E-02      | E-01      |
| k_Bacteria;p_Actinobacteria;c_Actinobacteria;o_Actinomycetales;f_Nocardiaceae;g_Rhodococcus;s__             | 31  | 6  | 131  | 22359 | 1.804E+00  | 0.8445 | 3.263E-02 | 1.076E-01 |
| k_Bacteria;p_Proteobacteria;c_Gammaproteobacteria;o_Pseudomonadales;f_Moraxellaceae;g_Enhydrobacter;s__     | 155 | 29 | 3146 | 2308  | 6.912E-01  | 0.3270 | 3.454E-02 | 1.123E-01 |
| k_Bacteria;p_Proteobacteria;c_Deltaproteobacteria;o_Mycococcales;f_0319-6G20;g__;s__                        | 9   | 3  | 132  | 3     | -2.445E+00 | 1.1612 | 3.525E-02 | 1.136E-01 |
| k_Bacteria;p_Actinobacteria;c_Actinobacteria;o_Actinomycetales;f_Micrococcaceae;g_Rothia;s_dentocariosa     | 70  | 16 | 1208 | 2122  | 1.029E+00  | 0.4897 | 3.567E-02 | 1.138E-01 |
| k_Bacteria;p_Proteobacteria;c_Alphaproteobacteria;o_Rhodobacterales;f_Hyphomonadaceae;g__;s__               | 3   | 6  | 11   | 203   | 2.524E+00  | 1.2129 | 3.743E-02 | 1.183E-01 |
| k_Bacteria;p_Firmicutes;c_Clostridia;o_Clostridiales;f_Ruminococcaceae;g_Faecalibacterium;s_prausnitzii     | 17  | 9  | 124  | 230   | 1.464E+00  | 0.7069 | 3.839E-02 | 1.202E-01 |
| k_Bacteria;p_Actinobacteria;c_Actinobacteria;o_Actinomycetales;f_Microbacteriaceae;g_Salinibacterium;s__    | 29  | 9  | 131  | 3773  | 1.432E+00  | 0.6965 | 3.975E-02 | 1.233E-01 |
| k_Bacteria;p_Proteobacteria;c_Alphaproteobacteria;o_Rhizobiales;f_Methylobacteriaceae;g__;s__               | 27  | 9  | 207  | 219   | 1.162E+00  | 0.5716 | 4.198E-02 | 1.290E-01 |
| k_Bacteria;p_Actinobacteria;c_Actinobacteria;o_Actinomycetales;f_Micrococcaceae;g_Rothia;s_mucilaginoso     | 117 | 23 | 7641 | 20362 | 9.409E-01  | 0.4654 | 4.321E-02 | 1.316E-01 |
| k_Bacteria;p_Proteobacteria;c_Gammaproteobacteria;o_Enterobacteriales;f_Enterobacteriaceae;g_Salmonella;s__ | 11  | 5  | 36   | 36    | 1.722E+00  | 0.8702 | 4.784E-02 | 1.444E-01 |
| k_Bacteria;p_[Thermi];c_Deinococci;o_Deinococcales;f_Deinococcaceae;g_Deinococcus;s_aquatilis               | 2   | 4  | 2    | 710   | 3.205E+00  | 1.6233 | 4.833E-02 | 1.446E-01 |
| k_Bacteria;p_Proteobacteria;c_Alphaproteobacteria;o_Sphingomonadales;f_Sphingomonadaceae;g_Kaistobacter;s__ | 29  | 12 | 252  | 751   | 1.129E+00  | 0.5752 | 4.967E-02 | 1.472E-01 |
| k_Bacteria;p_Firmicutes;c_Bacilli;o_Lactobacillales;f_Streptococcaceae;g_Streptococcus;s_anginosus          | 30  | 11 | 276  | 854   | 1.273E+00  | 0.6514 | 5.058E-02 | 1.486E-01 |
| k_Bacteria;p_Firmicutes;c_Erysipelotrichi;o_Erysipelotrichales;f_Erysipelotrichaceae;g__;s__                | 4   | 5  | 5    | 55    | 2.172E+00  | 1.1206 | 5.259E-02 | 1.532E-01 |
| k_Bacteria;p_Firmicutes;c_Bacilli;o_Gemellales;f_Gemellaceae;g_Gemella;s__                                  | 145 | 27 | 384  | 99    | -3.866E-01 | 0.200  | 5.330E-02 | 1.539E-01 |
| k_Bacteria;p_Bacteroidetes;c_Flavobacteriia;o_Flavobacteriales;f_Flavobacteriaceae;g_Capnocytophaga;s__     | 48  | 9  | 737  | 461   | 1.252E+00  | 0.6507 | 5.443E-02 | 1.549E-01 |
| k_Bacteria;p_Actinobacteria;c_Actinobacteria;o_Actinomycetales;f_Micrococcaceae;g__;s__                     | 89  | 15 | 729  | 3050  | 8.533E-01  | 0.4439 | 5.457     | 1.549     |

|                                                                                                                       |     |    |       |        |            |        |           |           |
|-----------------------------------------------------------------------------------------------------------------------|-----|----|-------|--------|------------|--------|-----------|-----------|
|                                                                                                                       |     |    |       |        |            |        | E-02      | E-01      |
| k_Bacteria;p_Proteobacteria;c_Gammaproteobacteria;o_Pasteurellales;f_Pasteurellaceae;g_Haemophilus;s__                | 52  | 10 | 1560  | 143861 | 1.354E+00  | 0.7125 | 5.742E-02 | 1.616E-01 |
| k_Bacteria;p_Proteobacteria;c_Alphaproteobacteria;o_Rhodobacterales;f_Rhodobacteraceae;g_Rubellimicrobium;s__         | 20  | 8  | 176   | 1244   | 1.486E+00  | 0.7847 | 5.829E-02 | 1.627E-01 |
| k_Bacteria;p_Firmicutes;c_Clostridia;o_Clostridiales;f_Lachnospiraceae;g_Coproccoccus;s__                             | 6   | 3  | 66    | 3      | -2.246E+00 | 1.1930 | 5.971E-02 | 1.653E-01 |
| k_Bacteria;p_Proteobacteria;c_Epsilonproteobacteria;o_Campylobacteriales;f_Campylobacteraceae;g_Arcobacter;s__        | 8   | 6  | 17    | 744    | 1.809E+00  | 0.9689 | 6.191E-02 | 1.700E-01 |
| k_Bacteria;p_Actinobacteria;c_Thermoleophilia;o_Solirubrobacterales;f_Conexibacteraceae;g__;s__                       | 2   | 6  | 3     | 180    | 2.620E+00  | 1.4087 | 6.285E-02 | 1.701E-01 |
| k_Bacteria;p_Proteobacteria;c_Deltaproteobacteria;o_Bdellovibrionales;f_Bdellovibrionaceae;g_Bdellovibrio;s__         | 14  | 6  | 66    | 188    | 1.401E+00  | 0.7533 | 6.296E-02 | 1.701E-01 |
| k_Bacteria;p_Firmicutes;c_Bacilli;o_Lactobacillales;f_Carnobacteriaceae;g_Carnobacterium;s__                          | 38  | 5  | 287   | 13     | -1.568E+00 | 0.8501 | 6.517E-02 | 1.733E-01 |
| k_Bacteria;p_Firmicutes;c_Bacilli;o_Bacillales;f_Bacillaceae;g_Bacillus;s__                                           | 43  | 15 | 1827  | 588    | 9.205E-01  | 0.4986 | 6.487E-02 | 1.733E-01 |
| k_Bacteria;p_Actinobacteria;c_Actinobacteria;o_Actinomycetales;f_Nocardioidaceae;g_Nocardioides;s__plantarum          | 2   | 5  | 2     | 94     | 2.598E+00  | 1.4177 | 6.692E-02 | 1.765E-01 |
| k_Bacteria;p_Proteobacteria;c_Betaproteobacteria;o_Rhodocyclales;f_Rhodocyclaceae;g_Zoogloea;s__                      | 2   | 6  | 2     | 245    | 2.749E+00  | 1.5039 | 6.751E-02 | 1.767E-01 |
| k_Bacteria;p_Proteobacteria;c_Alphaproteobacteria;o_Sphingomonadales;f_Sphingomonadaceae;g_Sphingomonas;s__echinoides | 38  | 10 | 328   | 1379   | 1.021E+00  | 0.5608 | 6.857E-02 | 1.781E-01 |
| k_Bacteria;p_Firmicutes;c_Bacilli;o_Lactobacillales;f_Enterococcaceae;g__;s__                                         | 28  | 8  | 530   | 32     | -1.208E+00 | 0.6777 | 7.466E-02 | 1.924E-01 |
| k_Bacteria;p_Firmicutes;c_Clostridia;o_Clostridiales;f_Peptococcaceae;g_Peptococcus;s__                               | 7   | 4  | 33    | 30     | 1.732E+00  | 0.9784 | 7.666E-02 | 1.960E-01 |
| k_Bacteria;p_Firmicutes;c_Clostridia;o_Clostridiales;f__[Tissierellaceae];g_Finegoldia;s__                            | 141 | 23 | 50194 | 3616   | -8.165E-01 | 0.4633 | 7.798E-02 | 1.979E-01 |
| k_Bacteria;p_Proteobacteria;c_Alphaproteobacteria;o_Rhizobiales;f_Phyllobacteriaceae;g_Mesorhizobium;s__              | 4   | 6  | 26    | 344    | 1.870E+00  | 1.0638 | 7.883E-02 | 1.985E-01 |
| k_Bacteria;p_TM7;c_TM7-3;o_EW055;f__;g__;s__                                                                          | 2   | 8  | 9     | 284    | 2.431E+00  | 1.3912 | 8.051E-02 | 2.013E-01 |
| k_Bacteria;p_Proteobacteria;c_Betaproteobacteria;o_Burkholderiales;f_Comamonadaceae;g_Limnohabitans;s__               | 3   | 8  | 9     | 212    | 1.945E+00  | 1.1271 | 8.433E-02 | 2.093E-01 |

|                                                                                                                                  |     |    |      |      |            |        |           |           |      |
|----------------------------------------------------------------------------------------------------------------------------------|-----|----|------|------|------------|--------|-----------|-----------|------|
|                                                                                                                                  |     |    |      |      |            |        |           | E-02      | E-01 |
| k_Bacteria;p_Proteobacteria;c_Betaproteobacteria;o_Burkholderiales;f_Oxalobacteraceae;g_Ralstonia;s__                            | 128 | 27 | 1312 | 709  | 6.225E-01  | 0.3644 | 8.753E-02 | 2.156E-01 |      |
| k_Bacteria;p_Firmicutes;c_Clostridia;o_Clostridiales;f_Veillonellaceae;g_Megamonas;s__                                           | 2   | 3  | 29   | 223  | 2.665E+00  | 1.5836 | 9.239E-02 | 2.259E-01 |      |
| k_Bacteria;p_Proteobacteria;c_Betaproteobacteria;o_Neisseriales;f_Neisseriaceae;g_Neisseria;s__                                  | 84  | 16 | 4172 | 4899 | 8.963E-01  | 0.5338 | 9.313E-02 | 2.261E-01 |      |
| k_Bacteria;p_Firmicutes;c_Clostridia;o_Clostridiales;f_Lachnospiraceae;g_Catonella;s__                                           | 2   | 3  | 32   | 186  | 2.673E+00  | 1.6009 | 9.499E-02 | 2.289E-01 |      |
| k_Bacteria;p_Fusobacteria;c_Fusobacteriia;o_Fusobacteriales;f_Leptotrichiaceae;g__;s__                                           | 2   | 4  | 2    | 81   | 2.519E+00  | 1.5619 | 1.068E-01 | 2.556E-01 |      |
| k_Bacteria;p_Bacteroidetes;c_[Saprospirae];o_[Saprospirales];f_Chitinophagaceae;g__;s__                                          | 2   | 7  | 25   | 245  | 2.030E+00  | 1.2655 | 1.087E-01 | 2.558E-01 |      |
| k_Bacteria;p_Firmicutes;c_Bacilli;o_Bacillales;f_Staphylococcaceae;g_jeotgalicoccus;s__                                          | 21  | 4  | 543  | 206  | 1.522E+00  | 0.9503 | 1.092E-01 | 2.558E-01 |      |
| k_Bacteria;p_Firmicutes;c_Bacilli;o_Lactobacillales;f_Streptococcaceae;g_Streptococcus;s_minor                                   | 7   | 7  | 19   | 87   | 1.388E+00  | 0.8658 | 1.089E-01 | 2.558E-01 |      |
| k_Bacteria;p_Actinobacteria;c_Actinobacteria;o_Actinomycetales;f_Nocardioidaceae;g_Friedmanniella;s__                            | 8   | 3  | 46   | 5    | -1.721E+00 | 1.0793 | 1.108E-01 | 2.578E-01 |      |
| k_Bacteria;p_Actinobacteria;c_Actinobacteria;o_Bifidobacteriales;f_Bifidobacteriaceae;g_Scardovia;s__                            | 10  | 6  | 147  | 124  | 1.584E+00  | 0.9975 | 1.124E-01 | 2.597E-01 |      |
| k_Bacteria;p_Actinobacteria;c_Actinobacteria;o_Actinomycetales;f_Sporichthyaceae;g__;s__                                         | 6   | 5  | 21   | 70   | 1.527E+00  | 0.972  | 1.163E-01 | 2.668E-01 |      |
| k_Bacteria;p_Proteobacteria;c_Betaproteobacteria;o_Burkholderiales;f_Comamonadaceae;g_Hydrogenophaga;s__                         | 4   | 5  | 16   | 1782 | 2.010E+00  | 1.2917 | 1.197E-01 | 2.694E-01 |      |
| k_Bacteria;p_Bacteroidetes;c_Flavobacteriia;o_Flavobacteriales;f_[Weeksellaceae];g__;s__                                         | 16  | 5  | 107  | 130  | 1.327E+00  | 0.8531 | 1.198E-01 | 2.694E-01 |      |
| k_Bacteria;p_Proteobacteria;c_Betaproteobacteria;o_Burkholderiales;f_Burkholderiaceae;g_Lautropia;s__                            | 21  | 6  | 231  | 136  | 1.176E+00  | 0.7540 | 1.188E-01 | 2.694E-01 |      |
| k_Bacteria;p_Firmicutes;c_Bacilli;o_Lactobacillales;f_Lactobacillaceae;g_Lactobacillus;s_iners                                   | 55  | 9  | 406  | 35   | -7.910E-01 | 0.5135 | 1.235E-01 | 2.757E-01 |      |
| k_Bacteria;p_Verrucomicrobia;c_[Spartobacteria];o_[Chthoniobacterales];f_[Chthoniobacteraceae];g_CandidatusXiphinematobacter;s__ | 2   | 3  | 44   | 195  | 2.444E+00  | 1.5927 | 1.249E-01 | 2.771E-01 |      |
| k_Bacteria;p_Actinobacteria;c_Actinobacteria;o_Bifidobacteriales;f_Bifidobacteriaceae;g_Bifidobacterium;s_adolescentis           | 17  | 8  | 74   | 149  | 9.095E-01  | 0.6082 | 1.348     | 2.951     |      |

|                                                                                                                    |     |    |      |     |            |        |           |           |
|--------------------------------------------------------------------------------------------------------------------|-----|----|------|-----|------------|--------|-----------|-----------|
|                                                                                                                    |     |    |      |     |            |        | E-01      | E-01      |
| k_Bacteria;p_Bacteroidetes;c_Bacteroidia;o_Bacteroidales;f_[Paraprevotellaceae];g_[Prevotella];s__                 | 42  | 10 | 576  | 433 | 9.018E-01  | 0.608  | 1.340E-01 | 2.951E-01 |
| k_Bacteria;p_Bacteroidetes;c_Flavobacteriia;o_Flavobacteriales;f_[Weeksellaceae];g_Elizabethingia;s_meningoseptica | 12  | 4  | 16   | 104 | 1.365E+00  | 0.9270 | 1.409E-01 | 3.065E-01 |
| k_Bacteria;p_Bacteroidetes;c_Bacteroidia;o_Bacteroidales;f_Porphyrimonadaceae;g_Porphyrimonas;s__                  | 74  | 16 | 1959 | 769 | 7.321E-01  | 0.4998 | 1.430E-01 | 3.090E-01 |
| k_Bacteria;p_Firmicutes;c_Clostridia;o_Clostridiales;f_Veillonellaceae;g_Dialister;s__                             | 62  | 13 | 2830 | 272 | -8.118E-01 | 0.5635 | 1.497E-01 | 3.215E-01 |
| k_Bacteria;p_Proteobacteria;c_Gammaproteobacteria;o_Pseudomonadales;f_Pseudomonadaceae;g_Pseudomonas;s_fragi       | 114 | 23 | 2237 | 835 | 4.980E-01  | 0.3523 | 1.575E-01 | 3.360E-01 |
| k_Bacteria;p_Firmicutes;c_Bacilli;o_Lactobacillales;f_Lactobacillaceae;g_Lactobacillus;s_zeae                      | 3   | 3  | 33   | 32  | 2.042E+00  | 1.4619 | 1.624E-01 | 3.444E-01 |
| k_Bacteria;p_Proteobacteria;c_Betaproteobacteria;o_Burkholderiales;f_Comamonadaceae;g_Tepidimonas;s__              | 47  | 2  | 281  | 4   | -1.712E+00 | 1.2421 | 1.680E-01 | 3.540E-01 |
| k_Bacteria;p_Proteobacteria;c_Alphaproteobacteria;o_Rhodobacterales;f_Rhodobacteraceae;g_Paracoccus;s__            | 49  | 12 | 275  | 209 | 6.901E-01  | 0.5062 | 1.728E-01 | 3.617E-01 |
| k_Bacteria;p_Proteobacteria;c_Betaproteobacteria;o_SBl14;f__;g__;s__                                               | 2   | 3  | 5    | 5   | 2.086E+00  | 1.5513 | 1.787E-01 | 3.706E-01 |
| k_Bacteria;p_Proteobacteria;c_Alphaproteobacteria;o_Rhizobiales;f_Aurantimonadaceae;g__;s__                        | 17  | 6  | 41   | 72  | 1.002E+00  | 0.7482 | 1.803E-01 | 3.706E-01 |
| k_Bacteria;p_Actinobacteria;c_Actinobacteria;o_Actinomycetales;f_Micrococcaceae;g_Arthrobacter;s__                 | 19  | 10 | 142  | 179 | 8.532E-01  | 0.6365 | 1.801E-01 | 3.706E-01 |
| k_Bacteria;p_Bacteroidetes;c_[Saprospirae];o_[Saprospirales];f_Chitinophagaceae;g_Flavisolibacter;s__              | 6   | 3  | 585  | 345 | 1.904E+00  | 1.4473 | 1.884E-01 | 3.758E-01 |
| k_Bacteria;p_Synergistetes;c_Synergistia;o_Synergistales;f_Synergistaceae;g_vadinCA02;s__                          | 4   | 3  | 4    | 49  | 1.614E+00  | 1.2300 | 1.895E-01 | 3.758E-01 |
| k_Bacteria;p_Actinobacteria;c_Actinobacteria;o_Actinomycetales;f_Dermacoccaceae;g_Dermacoccus;s__                  | 22  | 3  | 880  | 10  | -1.522E+00 | 1.1527 | 1.868E-01 | 3.758E-01 |
| k_Bacteria;p_Proteobacteria;c_Betaproteobacteria;o_Burkholderiales;f_Comamonadaceae;g_Acidovorax;s_delafieldii     | 4   | 6  | 36   | 533 | 1.519E+00  | 1.1535 | 1.878E-01 | 3.758E-01 |
| k_Bacteria;p_Proteobacteria;c_Gammaproteobacteria;o_Vibrionales;f_Pseudoalteromonadaceae;g_Pseudoalteromonas;s__   | 12  | 4  | 125  | 217 | 1.389E+00  | 1.0619 | 1.907E-01 | 3.758E-01 |
| k_Bacteria;p_Actinobacteria;c_Actinobacteria;o_Actinomycetales;f_Micrococcaceae;g_Micrococcus;s_luteus             | 21  | 5  | 66   | 11  | -1.01      | 0.7670 | 1.869     | 3.758     |



|                                                                                                                        |     |    |       |       |            |        |           |           |
|------------------------------------------------------------------------------------------------------------------------|-----|----|-------|-------|------------|--------|-----------|-----------|
|                                                                                                                        |     |    |       |       | 2E+00      |        | E-01      | E-01      |
| k__Bacteria;p__Proteobacteria;c__Betaproteobacteria;o__Burkholderiales;f__Comamonadaceae;g__Delftia;s__                | 135 | 28 | 6776  | 3663  | 4.377E-01  | 0.339  | 1.900E-01 | 3.758E-01 |
| k__Bacteria;p__Bacteroidetes;c__Bacteroidia;o__Bacteroidales;f__Prevotellaceae;g__Prevotella;s__intermedia             | 5   | 2  | 49    | 83    | 1.869E+00  | 1.4520 | 1.980E-01 | 3.875E-01 |
| k__Bacteria;p__Firmicutes;c__Clostridia;o__Clostridiales;f__Veillonellaceae;g__Selenomonas;s__                         | 37  | 12 | 802   | 320   | 7.577E-01  | 0.5898 | 1.989E-01 | 3.875E-01 |
| k__Bacteria;p__Proteobacteria;c__Alphaproteobacteria;o__Rhizobiales;f__Bradyrhizobiaceae;g__Bradyrhizobium;s__         | 146 | 27 | 405   | 64    | -2.533E-01 | 0.1979 | 2.006E-01 | 3.884E-01 |
| k__Bacteria;p__Bacteroidetes;c__Bacteroidia;o__Bacteroidales;f__Prevotellaceae;g__Prevotella;s__nanceiensis            | 20  | 5  | 120   | 32    | 1.000E+00  | 0.7897 | 2.054E-01 | 3.954E-01 |
| k__Bacteria;p__Proteobacteria;c__Deltaproteobacteria;o__Syntrophobacterales;f__Syntrophobacteraceae;g__s__             | 2   | 4  | 2     | 96    | 1.930E+00  | 1.5439 | 2.112E-01 | 3.957E-01 |
| k__Bacteria;p__Actinobacteria;c__Actinobacteria;o__Actinomycetales;f__Microbacteriaceae;g__Leucobacter;s__             | 7   | 8  | 54    | 164   | 1.201E+00  | 0.9569 | 2.096E-01 | 3.957E-01 |
| k__Bacteria;p__Proteobacteria;c__Gammaproteobacteria;o__Pasteurellales;f__Pasteurellaceae;g__Aggregatibacter;s__segnis | 12  | 5  | 123   | 122   | 1.137E+00  | 0.9097 | 2.114E-01 | 3.957E-01 |
| k__Bacteria;p__Firmicutes;c__Bacilli;o__Bacillales;f__Planococcaceae;g__Planomicrobium;s__                             | 23  | 9  | 114   | 453   | 8.874E-01  | 0.7076 | 2.099E-01 | 3.957E-01 |
| k__Bacteria;p__Firmicutes;c__Bacilli;o__Lactobacillales;f__Aerococcaceae;g__Facklamia;s__                              | 36  | 6  | 325   | 57    | -8.844E-01 | 0.7026 | 2.082E-01 | 3.957E-01 |
| k__Bacteria;p__Actinobacteria;c__Thermoleophilia;o__Solirubrobacterales;f__Solirubrobacteraceae;g__s__                 | 6   | 5  | 12    | 40    | 1.239E+00  | 0.9971 | 2.138E-01 | 3.980E-01 |
| k__Bacteria;p__Firmicutes;c__Clostridia;o__Clostridiales;f__[Tissierellaceae];g__Gallicola;s__                         | 8   | 3  | 83    | 342   | 1.636E+00  | 1.3325 | 2.195E-01 | 4.042E-01 |
| k__Bacteria;p__Firmicutes;c__Clostridia;o__Clostridiales;f__Clostridiaceae;g__Clostridium;s__                          | 36  | 11 | 242   | 175   | 6.609E-01  | 0.5384 | 2.196E-01 | 4.042E-01 |
| k__Bacteria;p__Actinobacteria;c__Actinobacteria;o__Actinomycetales;f__Corynebacteriaceae;g__Corynebacterium;s__durum   | 37  | 6  | 458   | 622   | 9.402E-01  | 0.7754 | 2.253E-01 | 4.124E-01 |
| k__Bacteria;p__Actinobacteria;c__Actinobacteria;o__Actinomycetales;f__Actinomycetaceae;g__s__                          | 7   | 4  | 22    | 15    | 1.202E+00  | 1.0087 | 2.333E-01 | 4.247E-01 |
| k__Bacteria;p__Firmicutes;c__Clostridia;o__Clostridiales;f__Veillonellaceae;g__Veillonella;s__parvula                  | 15  | 5  | 80    | 75    | 9.425E-01  | 0.8043 | 2.413E-01 | 4.369E-01 |
| k__Bacteria;p__Firmicutes;c__Clostridia;o__Clostridiales;f__[Tissierellaceae];g__Peptoniphilus;s__                     | 137 | 24 | 61085 | 10405 | -5.60      | 0.4828 | 2.457     | 4.425     |

|                                                                                                                      |     |    |        |      |            |        |           |           |
|----------------------------------------------------------------------------------------------------------------------|-----|----|--------|------|------------|--------|-----------|-----------|
|                                                                                                                      |     |    |        |      | 5E-01      |        | E-01      | E-01      |
| k_Bacteria;p_Proteobacteria;c_Betaproteobacteria;o_Rhodocyclales;f_Rhodocyclaceae;g_Dechloromonas;s__                | 2   | 8  | 17     | 343  | 1.720E+00  | 1.4954 | 2.499E-01 | 4.453E-01 |
| k_Bacteria;p_Proteobacteria;c_Gammaproteobacteria;o_Pasteurellales;f_Pasteurellaceae;g_Haemophilus;s__parainfluenzae | 66  | 10 | 1794   | 3352 | 7.477E-01  | 0.6511 | 2.508E-01 | 4.453E-01 |
| k_Bacteria;p_Actinobacteria;c_Actinobacteria;o_Actinomycetales;f_Propionibacteriaceae;g__;s__                        | 19  | 9  | 86     | 97   | 7.272E-01  | 0.6338 | 2.512E-01 | 4.453E-01 |
| k_Bacteria;p_Firmicutes;c_Clostridia;o_Clostridiales;f_Lachnospiraceae;g__[Ruminococcus];s__                         | 14  | 9  | 51     | 48   | 7.382E-01  | 0.6482 | 2.548E-01 | 4.492E-01 |
| k_Bacteria;p_Firmicutes;c_Bacilli;o_Bacillales;f_Bacillaceae;g_Geobacillus;s__                                       | 50  | 9  | 1066   | 118  | -7.666E-01 | 0.6845 | 2.627E-01 | 4.608E-01 |
| k_Bacteria;p_Actinobacteria;c_Actinobacteria;o_Actinomycetales;f_Microbacteriaceae;g_Rathayibacter;s__caricis        | 6   | 2  | 367    | 116  | 1.703E+00  | 1.5927 | 2.849E-01 | 4.917E-01 |
| k_Bacteria;p_Firmicutes;c_Bacilli;o_Lactobacillales;f_Enterococcaceae;g_Enterococcus;s__                             | 11  | 4  | 72     | 14   | -1.103E+00 | 1.0327 | 2.855E-01 | 4.917E-01 |
| k_Bacteria;p_Proteobacteria;c_Gammaproteobacteria;o_Enterobacteriales;f_Enterobacteriaceae;g_Morganella;s__          | 71  | 3  | 698    | 31   | -1.062E+00 | 0.9944 | 2.857E-01 | 4.917E-01 |
| k_Bacteria;p_Firmicutes;c_Bacilli;o_Lactobacillales;f_Aerococcaceae;g_Abitrophia;s__                                 | 33  | 6  | 570    | 506  | 8.137E-01  | 0.7639 | 2.868E-01 | 4.917E-01 |
| k_Bacteria;p_Proteobacteria;c_Gammaproteobacteria;o_Pasteurellales;f_Pasteurellaceae;g_Aggregatibacter;s__           | 17  | 9  | 320    | 96   | 8.028E-01  | 0.7550 | 2.877E-01 | 4.917E-01 |
| k_Bacteria;p_Bacteroidetes;c_Flavobacteriia;o_Flavobacteriales;f_Flavobacteriaceae;g_Capnocytophaga;s__ochracea      | 3   | 3  | 5      | 7    | 1.412E+00  | 1.3371 | 2.909E-01 | 4.922E-01 |
| k_Bacteria;p_Proteobacteria;c_Betaproteobacteria;o_Burkholderiales;f_Burkholderiaceae;g_Burkholderia;s__             | 145 | 30 | 768    | 2251 | 2.530E-01  | 0.2389 | 2.896E-01 | 4.922E-01 |
| k_Bacteria;p_Proteobacteria;c_Betaproteobacteria;o_Burkholderiales;f_Comamonadaceae;g_Acidovorax;s__                 | 2   | 3  | 7      | 102  | 1.796E+00  | 1.7097 | 2.934E-01 | 4.940E-01 |
| k_Bacteria;p_Spirochaetes;c_Spirochaetes;o_Spirochaetales;f_Spirochaetaceae;g_Treponema;s__                          | 3   | 2  | 31     | 29   | 1.666E+00  | 1.5967 | 2.966E-01 | 4.964E-01 |
| k_Bacteria;p_Fusobacteria;c_Fusobacteriia;o_Fusobacteriales;f_Leptotrichiaceae;g_Sneathia;s__                        | 13  | 3  | 230    | 4    | -1.141E+00 | 1.099  | 2.978E-01 | 4.964E-01 |
| k_Bacteria;p_Firmicutes;c_Bacilli;o_Bacillales;f_Staphylococcaceae;g_Staphylococcus;s__                              | 167 | 30 | 131054 | 4931 | -1.554E+00 | 1.5058 | 3.022E-01 | 4.986E-01 |
| k_Bacteria;p_Firmicutes;c_Clostridia;o_Clostridiales;f_Lachnospiraceae;g_Lachnospira;s__                             | 4   | 2  | 9      | 34   | 1.526E+00  | 1.4757 | 3.011     | 4.986     |

|                                                                                                                                    |     |    |       |      |            |        |           |           |
|------------------------------------------------------------------------------------------------------------------------------------|-----|----|-------|------|------------|--------|-----------|-----------|
|                                                                                                                                    |     |    |       |      |            |        | E-01      | E-01      |
| k_Bacteria;p_Proteobacteria;c_Gammaproteobacteria;o_Enterobacteriales;f_Enterobacteriaceae;g_Serratia;s_marcescens                 | 11  | 2  | 1161  | 3    | -1.575E+00 | 1.5516 | 3.101E-01 | 5.093E-01 |
| k_Bacteria;p_Firmicutes;c_Clostridia;o_Clostridiales;f_[Mogibacteriaceae];g__;s__                                                  | 14  | 4  | 58    | 62   | 9.428E-01  | 0.9419 | 3.168E-01 | 5.177E-01 |
| k_Bacteria;p_Proteobacteria;c_Betaproteobacteria;o_Burkholderiales;f_Comamonadaceae;g_Polaromonas;s__                              | 17  | 7  | 32    | 58   | 6.283E-01  | 0.6407 | 3.268E-01 | 5.314E-01 |
| k_Bacteria;p_Firmicutes;c_Clostridia;o_Clostridiales;f_[Tissierellaceae];g_1-68;s__                                                | 17  | 4  | 334   | 387  | 9.977E-01  | 1.0300 | 3.327E-01 | 5.359E-01 |
| k_Bacteria;p_Proteobacteria;c_Gammaproteobacteria;o_Pseudomonadales;f_Moraxellaceae;g_Acinetobacter;s__                            | 162 | 29 | 8909  | 2257 | 3.163E-01  | 0.3258 | 3.317E-01 | 5.359E-01 |
| k_Bacteria;p_Actinobacteria;c_Actinobacteria;o_Actinomycetales;f_Pseudonocardiaceae;g_Pseudonocardia;s__                           | 9   | 2  | 51    | 10   | -1.277E+00 | 1.3381 | 3.400E-01 | 5.400E-01 |
| k_Bacteria;p_Actinobacteria;c_Actinobacteria;o_Actinomycetales;f_Pseudonocardiaceae;g_Actinomycetospora;s__                        | 5   | 4  | 14    | 10   | 1.041E+00  | 1.0915 | 3.404E-01 | 5.400E-01 |
| k_Bacteria;p_Proteobacteria;c_Alphaproteobacteria;o_Caulobacterales;f_Caulobacteraceae;g_Brevundimonas;s_diminuta                  | 19  | 6  | 163   | 189  | 7.982E-01  | 0.8332 | 3.381E-01 | 5.400E-01 |
| k_Bacteria;p_Firmicutes;c_Clostridia;o_Clostridiales;f_Veillonellaceae;g_Megasphaera;s__                                           | 30  | 8  | 279   | 126  | 5.968E-01  | 0.6277 | 3.417E-01 | 5.400E-01 |
| k_Bacteria;p_Firmicutes;c_Clostridia;o_Thermoanaerobacterales;f_Caldicellulosiruptoraceae;g_Caldicellulosiruptor;s_saccharolyticus | 13  | 4  | 138   | 38   | -9.405E-01 | 0.9929 | 3.435E-01 | 5.403E-01 |
| k_Bacteria;p_Firmicutes;c_Bacilli;o_Bacillales;f_Staphylococcaceae;g_Staphylococcus;s_epidermidis                                  | 167 | 30 | 15399 | 702  | -1.269E+00 | 1.3450 | 3.455E-01 | 5.409E-01 |
| k_Bacteria;p_Actinobacteria;c_Actinobacteria;o_Actinomycetales;f_Yaniellaceae;g_Yaniella;s__                                       | 4   | 2  | 14    | 9    | 1.324E+00  | 1.4135 | 3.489E-01 | 5.437E-01 |
| k_Bacteria;p_Proteobacteria;c_Betaproteobacteria;o_Burkholderiales;f_Comamonadaceae;g_Comamonas;s__                                | 29  | 5  | 339   | 74   | -7.505E-01 | 0.8118 | 3.552E-01 | 5.509E-01 |
| k_Bacteria;p_Firmicutes;c_Clostridia;o_Clostridiales;f_Lachnospiraceae;g_[Ruminococcus];s_gnavus                                   | 3   | 4  | 64    | 190  | 1.370E+00  | 1.4989 | 3.609E-01 | 5.545E-01 |
| k_Bacteria;p_Cyanobacteria;c_4C0d-2;o_MLE1-12;f__;g__;s__                                                                          | 116 | 19 | 2903  | 5222 | 3.830E-01  | 0.4186 | 3.602E-01 | 5.545E-01 |
| k_Bacteria;p_Proteobacteria;c_Alphaproteobacteria;o_Rhizobiales;f_Brucellaceae;g__;s__                                             | 22  | 9  | 74    | 34   | 5.361E-01  | 0.5971 | 3.693E-01 | 5.623E-01 |
| k_Bacteria;p_Proteobacteria;c_Gammaproteobacteria;o_Pseudomonadales;f_Pseudomonadaceae;g_Pseudomonas;s_viridiflava                 | 47  | 14 | 673   | 741  | 4.714E-01  | 0.5242 | 3.685E-01 | 5.623E-01 |

|                                                                                                                        |     |    |        |       |            |        |           |           |
|------------------------------------------------------------------------------------------------------------------------|-----|----|--------|-------|------------|--------|-----------|-----------|
|                                                                                                                        |     |    |        |       |            |        | E-01      | E-01      |
| k_Bacteria;p_Firmicutes;c_Bacilli;o_Bacillales;f_Planococcaeae;g__;s__                                                 | 167 | 30 | 228426 | 13928 | -1.484E+00 | 1.6665 | 3.731E-01 | 5.637E-01 |
| k_Bacteria;p_Proteobacteria;c_Gammaproteobacteria;o_Enterobacteriales;f_Enterobacteriaceae;g_Proteus;s__               | 21  | 5  | 4981   | 852   | 1.025E+00  | 1.1523 | 3.735E-01 | 5.637E-01 |
| k_Bacteria;p_Bacteroidetes;c_[Saprospirae];o_[Saprospirales];f_Chitinophagaceae;g_Sediminibacterium;s__                | 109 | 19 | 3014   | 438   | -3.557E-01 | 0.4073 | 3.824E-01 | 5.744E-01 |
| k_Bacteria;p_Actinobacteria;c_Actinobacteria;o_Actinomycetales;f_Sanguibacteraceae;g_Sanguibacter;s__                  | 3   | 4  | 5      | 30    | 1.176E+00  | 1.3550 | 3.852E-01 | 5.761E-01 |
| k_Bacteria;p_Proteobacteria;c_Betaproteobacteria;o_Neisseriales;f_Neisseriaceae;g_Eikenella;s__                        | 6   | 4  | 28     | 20    | 9.324E-01  | 1.0910 | 3.927E-01 | 5.796E-01 |
| k_Bacteria;p_Proteobacteria;c_Betaproteobacteria;o_Neisseriales;f_Neisseriaceae;g_Kingella;s__                         | 14  | 4  | 137    | 66    | 8.656E-01  | 1.0109 | 3.919E-01 | 5.796E-01 |
| k_Bacteria;p_Proteobacteria;c_Alphaproteobacteria;o_Rhizobiales;f_Methylobacteriaceae;g_Methylobacterium;s__adhaesivum | 22  | 6  | 115    | 107   | 6.179E-01  | 0.7207 | 3.913E-01 | 5.796E-01 |
| k_Bacteria;p_Proteobacteria;c_Betaproteobacteria;o_Neisseriales;f_Neisseriaceae;g_Neisseria;s__subflava                | 10  | 2  | 87     | 10    | -1.140E+00 | 1.3583 | 4.013E-01 | 5.812E-01 |
| k_Bacteria;p_Bacteroidetes;c_Bacteroidia;o_Bacteroidales;f_Porphyrromonadaceae;g_Paludibacter;s__                      | 8   | 5  | 47     | 62    | 8.571E-01  | 1.0210 | 4.012E-01 | 5.812E-01 |
| k_Bacteria;p_Proteobacteria;c_Alphaproteobacteria;o_Caulobacterales;f_Caulobacteraceae;g_Mycoplana;s__                 | 21  | 8  | 131    | 184   | 5.588E-01  | 0.6675 | 4.025E-01 | 5.812E-01 |
| k_Bacteria;p_Proteobacteria;c_Gammaproteobacteria;o_Xanthomonadales;f_Xanthomonadaceae;g__;s__                         | 107 | 23 | 1698   | 798   | 2.949E-01  | 0.3497 | 3.991E-01 | 5.812E-01 |
| k_Bacteria;p_Proteobacteria;c_Gammaproteobacteria;o_Pseudomonadales;f_Moraxellaceae;g_Acinetobacter;s__johnsonii       | 151 | 26 | 825    | 281   | -2.245E-01 | 0.2644 | 3.959E-01 | 5.812E-01 |
| k_Bacteria;p_Proteobacteria;c_Deltaproteobacteria;o_Myxococcales;f__;g__;s__                                           | 29  | 5  | 286    | 200   | 7.084E-01  | 0.8509 | 4.052E-01 | 5.825E-01 |
| k_Bacteria;p_Proteobacteria;c_Betaproteobacteria;o_Burkholderiales;f_Comamonadaceae;g_Hylemonella;s__                  | 3   | 4  | 24     | 7     | -1.064E+00 | 1.2936 | 4.107E-01 | 5.865E-01 |
| k_Bacteria;p_Bacteroidetes;c_[Saprospirae];o_[Saprospirales];f_Saprospiraceae;g__;s__                                  | 4   | 6  | 70     | 143   | 9.640E-01  | 1.1737 | 4.115E-01 | 5.865E-01 |
| k_Bacteria;p_Proteobacteria;c_Alphaproteobacteria;o_Rhizobiales;f_Hyphomicrobiaceae;g__;s__                            | 2   | 5  | 10     | 84    | 1.152E+00  | 1.4116 | 4.146E-01 | 5.885E-01 |
| k_Bacteria;p_Bacteroidetes;c_Flavobacteriia;o_Flavobacteriales;f_[Weeksellaceae];g_Chryseobacterium;s__                | 153 | 29 | 2726   | 9296  | 2.616E-01  | 0.3238 | 4.191     | 5.925     |

|                                                                                                                          |     |    |                 |                |                        |                |                       |                       |
|--------------------------------------------------------------------------------------------------------------------------|-----|----|-----------------|----------------|------------------------|----------------|-----------------------|-----------------------|
|                                                                                                                          |     |    |                 |                |                        |                | E-01                  | E-01                  |
| k__Bacteria;p__Actinobacteria;c__Actinobacteria;o__Actinomycetales;f__Corynebacteriaceae;g__Corynebacterium;s__          | 166 | 29 | 182<br>219<br>0 | 12<br>02<br>46 | -<br>1.44<br>8E+<br>00 | 1.8<br>06<br>7 | 4.2<br>27<br>E-<br>01 | 5.9<br>50<br>E-<br>01 |
| k__Bacteria;p__Firmicutes;c__Bacilli;o__Bacillales;f__Staphylococcaceae;g__Staphylococcus;s__aureus                      | 166 | 28 | 214<br>01       | 43<br>3        | -<br>1.32<br>6E+<br>00 | 1.6<br>64<br>4 | 4.2<br>58<br>E-<br>01 | 5.9<br>68<br>E-<br>01 |
| k__Bacteria;p__WPS-2;c__o__f__g__s__                                                                                     | 5   | 5  | 115             | 30<br>8        | 8.72<br>9E-<br>01      | 1.1<br>17<br>4 | 4.3<br>47<br>E-<br>01 | 6.0<br>68<br>E-<br>01 |
| k__Bacteria;p__Proteobacteria;c__Gammaproteobacteria;o__Cardiobacteriales;f__Cardiobacteriaceae;g__Cardiobacterium;s__   | 6   | 2  | 18              | 9              | 1.04<br>4E+<br>00      | 1.3<br>44<br>1 | 4.3<br>75<br>E-<br>01 | 6.0<br>82<br>E-<br>01 |
| k__Bacteria;p__Proteobacteria;c__Gammaproteobacteria;o__Enterobacteriales;f__Enterobacteriaceae;g__Klebsiella;s__        | 9   | 2  | 310             | 36             | -<br>1.19<br>6E+<br>00 | 1.5<br>71<br>3 | 4.4<br>67<br>E-<br>01 | 6.1<br>84<br>E-<br>01 |
| k__Bacteria;p__Bacteroidetes;c__Bacteroidia;o__Bacteroidales;f__Prevotellaceae;g__Prevotella;s__copri                    | 9   | 5  | 140             | 10<br>3        | -<br>7.60<br>6E-<br>01 | 1.0<br>09<br>6 | 4.5<br>12<br>E-<br>01 | 6.2<br>21<br>E-<br>01 |
| k__Bacteria;p__Actinobacteria;c__Actinobacteria;o__Actinomycetales;f__Dermabacteraceae;g__Dermabacter;s__                | 39  | 7  | 301             | 56             | -<br>4.89<br>3E-<br>01 | 0.6<br>57<br>6 | 4.5<br>68<br>E-<br>01 | 6.2<br>72<br>E-<br>01 |
| k__Bacteria;p__Bacteroidetes;c__Cytophagia;o__Cytophagales;f__Cytophagaceae;g__Spirosoma;s__                             | 3   | 2  | 64              | 74<br>7        | 1.21<br>3E+<br>00      | 1.6<br>50<br>3 | 4.6<br>25<br>E-<br>01 | 6.3<br>23<br>E-<br>01 |
| k__Bacteria;p__Proteobacteria;c__Gammaproteobacteria;o__Oceanospirillales;f__Halomonadaceae;g__Halomonas;s__             | 162 | 29 | 350<br>7        | 11<br>38       | 1.91<br>2E-<br>01      | 0.2<br>62<br>4 | 4.6<br>61<br>E-<br>01 | 6.3<br>48<br>E-<br>01 |
| k__Bacteria;p__SR1;c__o__f__g__s__                                                                                       | 4   | 4  | 24              | 57             | 8.87<br>4E-<br>01      | 1.2<br>26<br>2 | 4.6<br>93<br>E-<br>01 | 6.3<br>64<br>E-<br>01 |
| k__Bacteria;p__Actinobacteria;c__Actinobacteria;o__Actinomycetales;f__Nakamurellaceae;g__s__                             | 6   | 7  | 21              | 51             | 7.28<br>8E-<br>01      | 1.0<br>13<br>2 | 4.7<br>19<br>E-<br>01 | 6.3<br>75<br>E-<br>01 |
| k__Bacteria;p__Bacteroidetes;c__Bacteroidia;o__Bacteroidales;f__Porphyromonadaceae;g__Parabacteroides;s__                | 5   | 2  | 10              | 13             | 1.01<br>8E+<br>00      | 1.4<br>33<br>9 | 4.7<br>76<br>E-<br>01 | 6.3<br>96<br>E-<br>01 |
| k__Bacteria;p__Bacteroidetes;c__Bacteroidia;o__Bacteroidales;f__Bacteroidaceae;g__Bacteroides;s__uniformis               | 17  | 8  | 166             | 10<br>2        | 5.18<br>3E-<br>01      | 0.7<br>32<br>4 | 4.7<br>92<br>E-<br>01 | 6.3<br>96<br>E-<br>01 |
| k__Bacteria;p__Proteobacteria;c__Gammaproteobacteria;o__Alteromonadales;f__Shewanellaceae;g__Shewanella;s__algae         | 157 | 29 | 211<br>5        | 71<br>4        | 1.84<br>8E-<br>01      | 0.2<br>59<br>0 | 4.7<br>56<br>E-<br>01 | 6.3<br>96<br>E-<br>01 |
| k__Bacteria;p__Actinobacteria;c__Actinobacteria;o__Actinomycetales;f__Micromonosporaceae;g__s__                          | 5   | 4  | 65              | 10             | -<br>8.29<br>8E-<br>01 | 1.1<br>91<br>8 | 4.8<br>63<br>E-<br>01 | 6.4<br>64<br>E-<br>01 |
| k__Bacteria;p__Actinobacteria;c__Actinobacteria;o__Actinomycetales;f__Propionibacteriaceae;g__Propionibacterium;s__acnes | 166 | 30 | 320<br>674      | 21<br>90<br>2  | -<br>1.21<br>6E+<br>00 | 1.8<br>04<br>6 | 5.0<br>06<br>E-<br>01 | 6.5<br>71<br>E-<br>01 |
| k__Bacteria;p__Tenericutes;c__Mollicutes;o__Mycoplasmatales;f__Mycoplasmataceae;g__Mycoplasma;s__                        | 3   | 4  | 71              | 42             | -<br>9.04              | 1.3<br>42<br>9 | 5.0<br>08             | 6.5<br>71             |

|                                                                                                                     |     |    |       |      |            |        |           |           |
|---------------------------------------------------------------------------------------------------------------------|-----|----|-------|------|------------|--------|-----------|-----------|
|                                                                                                                     |     |    |       |      | 1E-01      |        | E-01      | E-01      |
| k_Bacteria;p_Actinobacteria;c_Actinobacteria;o_Actinomycetales;f_Corynebacteriaceae;g_Corynebacterium;s_lubricantis | 8   | 4  | 48    | 122  | 6.601E-01  | 0.9835 | 5.021E-01 | 6.571E-01 |
| k_Bacteria;p_Proteobacteria;c_Alphaproteobacteria;o_Sphingomonadales;f_Sphingomonadaceae;g_Sphingobium;s__          | 37  | 9  | 249   | 189  | 3.983E-01  | 0.5875 | 4.978E-01 | 6.571E-01 |
| k_Bacteria;p_Firmicutes;c_Clostridia;o_Clostridiales;f_Veillonellaceae;g_Phascalactobacterium;s__                   | 6   | 4  | 52    | 50   | -7.265E-01 | 1.1022 | 5.098E-01 | 6.645E-01 |
| k_Bacteria;p_Actinobacteria;c_Coriobacteriia;o_Coriobacteriales;f_Coriobacteriaceae;g_Eggerthella;s_lenta           | 2   | 4  | 10    | 20   | 9.825E-01  | 1.5119 | 5.158E-01 | 6.685E-01 |
| k_Bacteria;p_Bacteroidetes;c_Bacteroidia;o_Bacteroidales;f_[Paraprevotellaceae];g_[Prevotella];s_tannerae           | 13  | 2  | 98    | 51   | -8.819E-01 | 1.3660 | 5.185E-01 | 6.685E-01 |
| k_Bacteria;p_Proteobacteria;c_Gammaproteobacteria;o_Alteromonadales;f_Shewanellaceae;g_Shewanella;s__               | 17  | 8  | 101   | 13   | 4.095E-01  | 0.6357 | 5.195E-01 | 6.685E-01 |
| k_Bacteria;p_Proteobacteria;c_Alphaproteobacteria;o_Rhizobiales;f_Methylobacteriaceae;g_Methylobacterium;s__        | 47  | 11 | 496   | 130  | 3.582E-01  | 0.5578 | 5.208E-01 | 6.685E-01 |
| k_Bacteria;p_Actinobacteria;c_Actinobacteria;o_Actinomycetales;f_Propionibacteriaceae;g_Microlunatus;s__            | 3   | 3  | 9     | 24   | 8.724E-01  | 1.3797 | 5.272E-01 | 6.691E-01 |
| k_Bacteria;p_Actinobacteria;c_Actinobacteria;o_Actinomycetales;f_Geodermatophilaceae;g_Modestobacter;s__            | 10  | 3  | 113   | 7    | -7.207E-01 | 1.1453 | 5.292E-01 | 6.691E-01 |
| k_Bacteria;p_Firmicutes;c_Bacilli;o_Lactobacillales;f_Lactobacillaceae;g_Lactobacillus;s_reuteri                    | 13  | 4  | 126   | 525  | 7.115E-01  | 1.1347 | 5.306E-01 | 6.691E-01 |
| k_Bacteria;p_Actinobacteria;c_Actinobacteria;o_Actinomycetales;f_Dermabacteraceae;g_Brachybacterium;s_conglomeratum | 35  | 7  | 191   | 50   | 4.018E-01  | 0.6418 | 5.313E-01 | 6.691E-01 |
| k_Bacteria;p_Proteobacteria;c_Betaproteobacteria;o_Neisseriales;f_Neisseriaceae;g_s__                               | 124 | 22 | 44053 | 4758 | -3.474E-01 | 0.5483 | 5.263E-01 | 6.691E-01 |
| k_Bacteria;p_Acidobacteria;c_Acidobacteria-6;o_iii1-15;f_g_s__                                                      | 6   | 4  | 145   | 73   | -7.406E-01 | 1.1914 | 5.342E-01 | 6.693E-01 |
| k_Bacteria;p_Proteobacteria;c_Gammaproteobacteria;o_Xanthomonadales;f_Sinobacteraceae;g_s__                         | 80  | 20 | 1013  | 280  | 2.239E-01  | 0.3613 | 5.354E-01 | 6.693E-01 |
| k_Bacteria;p_Proteobacteria;c_Alphaproteobacteria;o_f_g_s__                                                         | 63  | 12 | 609   | 657  | 3.024E-01  | 0.4989 | 5.444E-01 | 6.779E-01 |
| k_Bacteria;p_Firmicutes;c_Clostridia;o_Clostridiales;f_g_s__                                                        | 20  | 9  | 142   | 121  | 3.865E-01  | 0.6421 | 5.472E-01 | 6.790E-01 |
| k_Bacteria;p_Firmicutes;c_Clostridia;o_Clostridiales;f_[Mogibacteriaceae];g_Mogibacterium;s__                       | 5   | 3  | 11    | 6    | 7.148E-01  | 1.2035 | 5.525     | 6.830     |

|                                                                                                                           |     |    |       |      |            |        |           |           |
|---------------------------------------------------------------------------------------------------------------------------|-----|----|-------|------|------------|--------|-----------|-----------|
|                                                                                                                           |     |    |       |      |            |        | E-01      | E-01      |
| k_Bacteria;p_Firmicutes;c_Clostridia;o_Clostridiales;f_[Tissierellaceae];g_WAL_1855D;s__                                  | 21  | 3  | 707   | 1400 | 7.314E-01  | 1.2565 | 5.605E-01 | 6.903E-01 |
| k_Bacteria;p_Proteobacteria;c_Alphaproteobacteria;o_Rhizobiales;f_Phyllobacteriaceae;g_Aminobacter;s__                    | 8   | 6  | 41    | 116  | 5.060E-01  | 0.904  | 5.756E-01 | 7.064E-01 |
| k_Bacteria;p_Proteobacteria;c_Alphaproteobacteria;o_Rhizobiales;f_Phyllobacteriaceae;g_Phyllobacterium;s__                | 144 | 30 | 490   | 535  | 1.304E-01  | 0.2346 | 5.784E-01 | 7.072E-01 |
| k_Bacteria;p_Actinobacteria;c_Actinobacteria;o_Actinomycetales;f_Nocardiaceae;g_Rhodococcus;s_fascians                    | 4   | 2  | 13    | 4    | -7.966E-01 | 1.4688 | 5.876E-01 | 7.157E-01 |
| k_Bacteria;p_Proteobacteria;c_Gammaproteobacteria;o_Pasteurellales;f_Pasteurellaceae;g_Actinobacillus;s_paraahaemolyticus | 11  | 3  | 79    | 157  | 6.137E-01  | 1.1435 | 5.915E-01 | 7.180E-01 |
| k_Bacteria;p_Firmicutes;c_Clostridia;o_Clostridiales;f_Veillonellaceae;g_Veillonella;s__                                  | 20  | 4  | 360   | 49   | -4.887E-01 | 0.9295 | 5.991E-01 | 7.245E-01 |
| k_Bacteria;p_Actinobacteria;c_Actinobacteria;o_Actinomycetales;f_Actinomycetaceae;g_Varibaculum;s__                       | 16  | 3  | 152   | 14   | -5.358E-01 | 1.0326 | 6.038E-01 | 7.250E-01 |
| k_Bacteria;p_Bacteroidetes;c_Bacteroidia;o_Bacteroidales;f_Prevotellaceae;g_Prevotella;s__                                | 96  | 23 | 11849 | 1386 | 2.256E-01  | 0.4324 | 6.018E-01 | 7.250E-01 |
| k_Bacteria;p_Actinobacteria;c_Actinobacteria;o_Actinomycetales;f_Gordoniaceae;g_Gordonia;s__                              | 5   | 3  | 108   | 46   | 6.405E-01  | 1.3193 | 6.274E-01 | 7.479E-01 |
| k_Bacteria;p_TM7;c_TM7-3;o_CW040;f_F16;g__;s__                                                                            | 8   | 4  | 61    | 113  | 5.612E-01  | 1.1520 | 6.261E-01 | 7.479E-01 |
| k_Bacteria;p_Chloroflexi;c_Ellin6529;o__;f__;g__;s__                                                                      | 7   | 6  | 27    | 48   | 4.028E-01  | 0.8726 | 6.444E-01 | 7.655E-01 |
| k_Bacteria;p_Firmicutes;c_Bacilli;o_Lactobacillales;f_Carnobacteriaceae;g__;s__                                           | 19  | 10 | 84    | 103  | 2.647E-01  | 0.5963 | 6.571E-01 | 7.778E-01 |
| k_Bacteria;p_Cyanobacteria;c_Nostocophycideae;o_Stigonematales;f_Rivulariaceae;g_Calothrix;s__                            | 5   | 2  | 229   | 139  | -7.036E-01 | 1.6023 | 6.606E-01 | 7.792E-01 |
| k_Bacteria;p_Proteobacteria;c_Alphaproteobacteria;o_Rhizobiales;f_Bradyrhizobiaceae;g_Bosea;s_genosp.                     | 14  | 6  | 56    | 38   | 3.520E-01  | 0.8166 | 6.664E-01 | 7.833E-01 |
| k_Bacteria;p_Proteobacteria;c_Alphaproteobacteria;o_Rhizobiales;f_Hyphomicrobiaceae;g_Devesia;s__                         | 35  | 11 | 242   | 220  | 2.380E-01  | 0.5613 | 6.715E-01 | 7.866E-01 |
| k_Bacteria;p_Proteobacteria;c_Betaproteobacteria;o_Burkholderiales;f_Alcaligenaceae;g_Achromobacter;s__                   | 89  | 20 | 948   | 304  | -1.641E-01 | 0.4017 | 6.830E-01 | 7.972E-01 |
| k_Bacteria;p_Actinobacteria;c_Acidimicrobiia;o_Acidimicrobiales;f_Microthrixaceae;g_CandidatusMicrothrix;s_parvicella     | 4   | 2  | 17    | 10   | 5.742E-01  | 1.4673 | 6.955     | 7.994     |

|                                                                                                                        |     |    |            |                |                    |                |                   |                   |
|------------------------------------------------------------------------------------------------------------------------|-----|----|------------|----------------|--------------------|----------------|-------------------|-------------------|
|                                                                                                                        |     |    |            |                |                    |                | E-01              | E-01              |
| k__Bacteria;p__Proteobacteria;c__Alphaproteobacteria;o__Rhodobacterales;f__Rhodobacteraceae;g__Amaricoccus;s__         | 3   | 4  | 8          | 39             | 5.54<br>1E-01      | 1.3<br>87<br>4 | 6.8<br>96<br>E-01 | 7.9<br>94<br>E-01 |
| k__Bacteria;p__Proteobacteria;c__Gammaproteobacteria;o__Pseudomonadales;f__Moraxellaceae;g__Alkanindiges;s__           | 4   | 3  | 12         | 42             | 5.13<br>0E-01      | 1.3<br>32<br>7 | 7.0<br>03<br>E-01 | 7.9<br>94<br>E-01 |
| k__Bacteria;p__Proteobacteria;c__Alphaproteobacteria;o__Rhizobiales;f__Rhizobiaceae;g__Rhizobium;s__                   | 6   | 3  | 50         | 19             | -<br>4.72<br>1E-01 | 1.2<br>36<br>6 | 7.0<br>27<br>E-01 | 7.9<br>94<br>E-01 |
| k__Bacteria;p__Bacteroidetes;c__Flavobacteriia;o__Flavobacteriales;f__[Weeksellaceae];g__Wautersiella;s__              | 5   | 3  | 9          | 12             | 4.70<br>2E-01      | 1.2<br>44<br>4 | 7.0<br>55<br>E-01 | 7.9<br>94<br>E-01 |
| k__Bacteria;p__Cyanobacteria;c__Oscillatoriothyriceae;o__Chroococcales;f__Xenococcaceae;g__;s__                        | 20  | 5  | 794        | 79<br>5        | -<br>3.68<br>5E-01 | 0.9<br>64<br>4 | 7.0<br>24<br>E-01 | 7.9<br>94<br>E-01 |
| k__Bacteria;p__Proteobacteria;c__Betaproteobacteria;o__Burkholderiales;f__Oxalobacteraceae;g__Cupriavidus;s__          | 30  | 3  | 218        | 13             | -<br>3.60<br>7E-01 | 0.9<br>57<br>3 | 7.0<br>63<br>E-01 | 7.9<br>94<br>E-01 |
| k__Bacteria;p__Bacteroidetes;c__Bacteroidia;o__Bacteroidales;f__Prevotellaceae;g__Prevotella;s__nigrescens             | 20  | 5  | 103        | 72             | 2.95<br>8E-01      | 0.7<br>80<br>8 | 7.0<br>48<br>E-01 | 7.9<br>94<br>E-01 |
| k__Bacteria;p__Actinobacteria;c__Coriobacteriia;o__Coriobacteriales;f__Coriobacteriaceae;g__Collinsella;s__aerofaciens | 21  | 7  | 187        | 20<br>3        | 2.79<br>8E-01      | 0.7<br>30<br>4 | 7.0<br>16<br>E-01 | 7.9<br>94<br>E-01 |
| k__Bacteria;p__Proteobacteria;c__Gammaproteobacteria;o__Enterobacteriales;f__Enterobacteriaceae;g__;s__                | 165 | 30 | 281<br>43  | 17<br>10<br>53 | 6.42<br>5E-01      | 1.8<br>24<br>1 | 7.2<br>47<br>E-01 | 8.1<br>46<br>E-01 |
| k__Bacteria;p__Actinobacteria;c__Actinobacteria;o__Actinomycetales;f__Cellulomonadaceae;g__Cellulomonas;s__            | 23  | 4  | 158        | 47             | -<br>3.23<br>0E-01 | 0.9<br>10<br>3 | 7.2<br>28<br>E-01 | 8.1<br>46<br>E-01 |
| k__Bacteria;p__Proteobacteria;c__Gammaproteobacteria;o__Vibrionales;f__Vibrionaceae;g__Vibrio;s__                      | 13  | 2  | 44         | 9              | -<br>4.31<br>3E-01 | 1.2<br>65<br>4 | 7.3<br>32<br>E-01 | 8.2<br>15<br>E-01 |
| k__Bacteria;p__Firmicutes;c__Bacilli;o__Lactobacillales;f__Aerococcaceae;g__Alloiooccus;s__                            | 87  | 16 | 245<br>413 | 35<br>74<br>4  | 2.72<br>1E-01      | 0.8<br>26<br>6 | 7.4<br>20<br>E-01 | 8.2<br>86<br>E-01 |
| k__Bacteria;p__Firmicutes;c__Clostridia;o__Clostridiales;f__Lachnospiraceae;g__Blautia;s__                             | 38  | 11 | 349        | 28<br>9        | 1.76<br>6E-01      | 0.5<br>58<br>8 | 7.5<br>20<br>E-01 | 8.3<br>69<br>E-01 |
| k__Bacteria;p__Firmicutes;c__Bacilli;o__Lactobacillales;f__Lactobacillaceae;g__Lactobacillus;s__                       | 89  | 15 | 242<br>5   | 13<br>89       | 1.46<br>3E-01      | 0.4<br>85<br>8 | 7.6<br>33<br>E-01 | 8.4<br>67<br>E-01 |
| k__Bacteria;p__Proteobacteria;c__Betaproteobacteria;o__Burkholderiales;f__Comamonadaceae;g__Variovorax;s__paradoxus    | 151 | 30 | 624        | 37<br>4        | -<br>6.07<br>4E-02 | 0.2<br>05<br>5 | 7.6<br>76<br>E-01 | 8.4<br>87<br>E-01 |
| k__Bacteria;p__Cyanobacteria;c__Oscillatoriothyriceae;o__Chroococcales;f__Xenococcaceae;g__Chroococciopsis;s__         | 8   | 3  | 70         | 43             | -<br>3.27<br>6E-01 | 1.2<br>00<br>0 | 7.8<br>49<br>E-01 | 8.6<br>49<br>E-01 |
| k__Bacteria;p__Actinobacteria;c__Actinobacteria;o__Actinomycetales;f__Dietziaceae;g__;s__                              | 5   | 3  | 26         | 14             | 3.36<br>8E-01      | 1.2<br>69<br>9 | 7.9<br>08         | 8.6<br>84         |



|                                                                                                                     |     |    |       |      |            |        |           |           |
|---------------------------------------------------------------------------------------------------------------------|-----|----|-------|------|------------|--------|-----------|-----------|
|                                                                                                                     |     |    |       |      |            |        | E-01      | E-01      |
| k_Bacteria;p_Proteobacteria;c_Gammaproteobacteria;o_Pseudomonadales;f_Pseudomonadaceae;g_Pseudomonas;s__            | 144 | 27 | 12292 | 1218 | -8.047E-02 | 0.3069 | 7.932E-01 | 8.684E-01 |
| k_Bacteria;p_Proteobacteria;c_Alphaproteobacteria;o_Rhizobiales;f_Rhizobiaceae;g__;s__                              | 13  | 6  | 39    | 56   | 2.002E-01  | 0.7751 | 7.962E-01 | 8.688E-01 |
| k_Bacteria;p_Proteobacteria;c_Gammaproteobacteria;o_Pseudomonadales;f_Moraxellaceae;g_Psychrobacter;s_sanguinis     | 14  | 2  | 36    | 15   | -3.079E-01 | 1.2241 | 8.014E-01 | 8.712E-01 |
| k_Bacteria;p_Firmicutes;c_Clostridia;o_Clostridiales;f_Lachnospiraceae;g_Dorea;s__                                  | 6   | 4  | 47    | 21   | 2.742E-01  | 1.1027 | 8.036E-01 | 8.712E-01 |
| k_Bacteria;p_Proteobacteria;c_Alphaproteobacteria;o_Caulobacterales;f_Caulobacteraceae;g_Phenylobacterium;s__       | 6   | 5  | 50    | 14   | -2.354E-01 | 0.9935 | 8.127E-01 | 8.782E-01 |
| k_Bacteria;p_Proteobacteria;c_Betaproteobacteria;o_Burkholderiales;f_Oxalobacteraceae;g_Janthinobacterium;s_lividum | 156 | 30 | 3010  | 1456 | -6.666E-02 | 0.2853 | 8.153E-01 | 8.782E-01 |
| k_Bacteria;p_Actinobacteria;c_Actinobacteria;o_Bifidobacteriales;f_Bifidobacteriaceae;g__;s__                       | 40  | 6  | 256   | 281  | 1.537E-01  | 0.6982 | 8.257E-01 | 8.841E-01 |
| k_Bacteria;p_[Thermi];c_Deinococci;o_Thermales;f_Thermaceae;g_Thermus;s__                                           | 67  | 11 | 1197  | 302  | -1.229E-01 | 0.5593 | 8.260E-01 | 8.841E-01 |
| k_Bacteria;p_Actinobacteria;c_Actinobacteria;o_Actinomycetales;f_Brevibacteriaceae;g_Brevibacterium;s__             | 40  | 9  | 1058  | 119  | -1.380E-01 | 0.6615 | 8.347E-01 | 8.905E-01 |
| k_Bacteria;p_Firmicutes;c_Bacilli;o_Lactobacillales;f_Aerococcaceae;g_Aerococcus;s__                                | 15  | 3  | 151   | 14   | -2.247E-01 | 1.1190 | 8.409E-01 | 8.941E-01 |
| k_Bacteria;p_Cyanobacteria;c_Chloroplast;o_Streptophyta;f__;g__;s__                                                 | 110 | 21 | 5634  | 1447 | -7.896E-02 | 0.3996 | 8.434E-01 | 8.941E-01 |
| k_Bacteria;p_Proteobacteria;c_Gammaproteobacteria;o_Alteromonadales;f_Psychromonadaceae;g_Psychromonas;s__          | 3   | 2  | 33    | 12   | 2.444E-01  | 1.5984 | 8.785E-01 | 9.172E-01 |
| k_Bacteria;p_Actinobacteria;c_Actinobacteria;o_Actinomycetales;f_Dietziaceae;g_Dietzia;s__                          | 10  | 2  | 287   | 5    | -2.128E-01 | 1.4051 | 8.796E-01 | 9.172E-01 |
| k_Bacteria;p_Firmicutes;c_Erysipelotrichi;o_Erysipelotrichales;f_Erysipelotrichaceae;g_[Eubacterium];s_biforme      | 4   | 3  | 8     | 12   | -1.964E-01 | 1.3203 | 8.818E-01 | 9.172E-01 |
| k_Bacteria;p_Firmicutes;c_Bacilli;o_Lactobacillales;f_Streptococcaceae;g_Lactococcus;s__                            | 47  | 7  | 527   | 174  | 1.066E-01  | 0.7117 | 8.810E-01 | 9.172E-01 |
| k_Bacteria;p_Proteobacteria;c_Gammaproteobacteria;o_Enterobacteriales;f_Enterobacteriaceae;g_Erwinia;s__            | 27  | 7  | 146   | 26   | -1.065E-01 | 0.6633 | 8.725E-01 | 9.172E-01 |
| k_Bacteria;p_Actinobacteria;c_Actinobacteria;o_Actinomycetales;f_Micrococcaceae;g_Kocuria;s_rhizophila              | 77  | 15 | 21509 | 2495 | 8.936E-02  | 0.5764 | 8.768     | 9.172     |

|                                                                                                                      |    |    |      |     |            |        |           |           |
|----------------------------------------------------------------------------------------------------------------------|----|----|------|-----|------------|--------|-----------|-----------|
|                                                                                                                      |    |    |      |     |            |        | E-01      | E-01      |
| k_Bacteria;p_Proteobacteria;c_Epsilonproteobacteria;o_Campylobacteriales;f_Campylobacteraceae;g_Campylobacter;s__    | 69 | 14 | 4611 | 374 | -8.045E-02 | 0.5530 | 8.843E-01 | 9.172E-01 |
| k_Bacteria;p_Actinobacteria;c_Actinobacteria;o_Actinomycetales;f_Actinomycetaceae;g_Actinobaculum;s__                | 10 | 2  | 42   | 33  | 1.640E-01  | 1.2892 | 8.987E-01 | 9.293E-01 |
| k_Bacteria;p_Proteobacteria;c_Alphaproteobacteria;o_Sphingomonadales;f_Sphingomonadaceae;g_Sphingopyxis;s_alaskensis | 2  | 3  | 4    | 12  | 1.686E-01  | 1.6492 | 9.186E-01 | 9.398E-01 |
| k_Bacteria;p_Proteobacteria;c_Gammaproteobacteria;o_Alteromonadales;f_[Chromatiaceae];g_Rheinheimera;s__             | 2  | 4  | 19   | 18  | 1.586E-01  | 1.4780 | 9.146E-01 | 9.398E-01 |
| k_Bacteria;p_Proteobacteria;c_Gammaproteobacteria;o_Pseudomonadales;f_Moraxellaceae;g_Psychrobacter;s__              | 14 | 4  | 27   | 9   | 9.196E-02  | 0.9173 | 9.201E-01 | 9.398E-01 |
| k_Bacteria;p_Bacteroidetes;c_Bacteroidia;o_Bacteroidales;f_Bacteroidaceae;g_Bacteroides;s__                          | 30 | 9  | 471  | 314 | 6.942E-02  | 0.6382 | 9.134E-01 | 9.398E-01 |
| k_Bacteria;p_Bacteroidetes;c_Bacteroidia;o_Bacteroidales;f_Bacteroidaceae;g_Bacteroides;s_caccae                     | 5  | 2  | 23   | 32  | 1.235E-01  | 1.4600 | 9.326E-01 | 9.494E-01 |
| k_Bacteria;p_Firmicutes;c_Bacilli;o_Bacillales;f_Bacillaceae;g_Bacillus;s_flexus                                     | 5  | 3  | 30   | 13  | 1.062E-01  | 1.3136 | 9.356E-01 | 9.494E-01 |
| k_Bacteria;p_Bacteroidetes;c_Cytophagia;o_Cytophagales;f_Cytophagaceae;g_Dyadobacter;s__                             | 3  | 4  | 38   | 43  | -1.031E-01 | 1.3281 | 9.381E-01 | 9.494E-01 |
| k_Bacteria;p_Bacteroidetes;c_Flavobacteriia;o_Flavobacteriales;f_[Weeksellaceae];g_Cloacibacterium;s__               | 44 | 9  | 349  | 236 | 3.330E-02  | 0.6085 | 9.564E-01 | 9.650E-01 |
| k_Bacteria;p_Firmicutes;c_Bacilli;o_Lactobacillales;f_Aerococcaceae;g__;s__                                          | 18 | 5  | 72   | 33  | 3.569E-02  | 0.7851 | 9.637E-01 | 9.695E-01 |
| k_Bacteria;p_Actinobacteria;c_Actinobacteria;o_Actinomycetales;f_Nocardiodaceae;g_Propionisimonas;s__                | 7  | 7  | 423  | 69  | -3.987E-02 | 0.9883 | 9.678E-01 | 9.707E-01 |
| k_Bacteria;p_Bacteroidetes;c_Bacteroidia;o_Bacteroidales;f_Bacteroidaceae;g_Bacteroides;s_ovatus                     | 7  | 4  | 219  | 65  | 5.892E-03  | 1.2341 | 9.962E-01 | 9.962E-01 |
| k_Bacteria;p_[Thermi];c_Deinococci;o_Deinococcales;f_Deinococcaceae;g_CM44;s__                                       | 1  | 2  | 1    | 115 | NA         | NA     | NA        | NA        |
| k_Bacteria;p_Acidobacteria;c_[Chloracidobacteria];o_DS-100;f__;g__;s__                                               | 1  | 6  | 1    | 434 | NA         | NA     | NA        | NA        |
| k_Bacteria;p_Acidobacteria;c_[Chloracidobacteria];o_RB41;f__;g__;s__                                                 | 0  | 3  | 0    | 74  | NA         | NA     | NA        | NA        |
| k_Bacteria;p_Acidobacteria;c_Acidobacteria-6;o_CCU21;f__;g__;s__                                                     | 1  | 3  | 6    | 30  | NA         | NA     | NA        | NA        |
| k_Bacteria;p_Acidobacteria;c_Acidobacteria-6;o_iii1-15;f_mb2424;g__;s__                                              | 1  | 5  | 10   | 111 | NA         | NA     | NA        | NA        |
| k_Bacteria;p_Acidobacteria;c_DA052;o_Ellin6513;f__;g__;s__                                                           | 2  | 0  | 65   | 0   | NA         | NA     | NA        | NA        |

|                                                                                                               |   |   |     |     |    |    |    |    |
|---------------------------------------------------------------------------------------------------------------|---|---|-----|-----|----|----|----|----|
| k_Bacteria;p_Acidobacteria;c_Holophagae;o_Holophagales;f_Holophagaceae;g_Geothrix;s__                         | 0 | 2 | 0   | 40  | NA | NA | NA | NA |
| k_Bacteria;p_Acidobacteria;c_Sva0725;o_Sva0725;f__;g__;s__                                                    | 0 | 6 | 0   | 60  | NA | NA | NA | NA |
| k_Bacteria;p_Actinobacteria;c_Actinobacteria;o_Actinomycetales;f_ACK-M1;g__;s__                               | 0 | 3 | 0   | 144 | NA | NA | NA | NA |
| k_Bacteria;p_Actinobacteria;c_Actinobacteria;o_Actinomycetales;f_Actinomycetaceae;g_Mobiluncus;s__            | 7 | 1 | 133 | 1   | NA | NA | NA | NA |
| k_Bacteria;p_Actinobacteria;c_Actinobacteria;o_Actinomycetales;f_Geodermatophilaceae;g_Geodermatophilus;s__   | 5 | 0 | 11  | 0   | NA | NA | NA | NA |
| k_Bacteria;p_Actinobacteria;c_Actinobacteria;o_Actinomycetales;f_Intrasporangiaceae;g_Arsenicococcus;s__      | 2 | 0 | 21  | 0   | NA | NA | NA | NA |
| k_Bacteria;p_Actinobacteria;c_Actinobacteria;o_Actinomycetales;f_Kineosporiaceae;g_Kineococcus;s__            | 3 | 0 | 73  | 0   | NA | NA | NA | NA |
| k_Bacteria;p_Actinobacteria;c_Actinobacteria;o_Actinomycetales;f_Micrococcaceae;g_Kocuria;s__                 | 4 | 1 | 8   | 2   | NA | NA | NA | NA |
| k_Bacteria;p_Actinobacteria;c_Actinobacteria;o_Actinomycetales;f_Micrococcaceae;g_Nesterenkonia;s__           | 0 | 2 | 0   | 40  | NA | NA | NA | NA |
| k_Bacteria;p_Actinobacteria;c_Actinobacteria;o_Actinomycetales;f_Nocardiopsaceae;g__;s__                      | 5 | 0 | 15  | 0   | NA | NA | NA | NA |
| k_Bacteria;p_Actinobacteria;c_Actinobacteria;o_Actinomycetales;f_Propionibacteriaceae;g_Luteococcus;s__       | 2 | 1 | 22  | 1   | NA | NA | NA | NA |
| k_Bacteria;p_Actinobacteria;c_Actinobacteria;o_Actinomycetales;f_Pseudonocardiaceae;g_Saccharopolyspora;s__   | 5 | 0 | 75  | 0   | NA | NA | NA | NA |
| k_Bacteria;p_Actinobacteria;c_Actinobacteria;o_Actinomycetales;f_Streptomycetaceae;g_Streptomyces;s__         | 6 | 0 | 40  | 0   | NA | NA | NA | NA |
| k_Bacteria;p_Actinobacteria;c_Actinobacteria;o_Actinomycetales;f_Williamsiaceae;g_Williamsia;s__              | 5 | 1 | 61  | 3   | NA | NA | NA | NA |
| k_Bacteria;p_Actinobacteria;c_Coriobacteriia;o_Coriobacteriales;f_Coriobacteriaceae;g_Slackia;s__             | 0 | 2 | 0   | 37  | NA | NA | NA | NA |
| k_Bacteria;p_Actinobacteria;c_KIST-JJY010;o__;f__;g__;s__                                                     | 1 | 2 | 2   | 80  | NA | NA | NA | NA |
| k_Bacteria;p_Actinobacteria;c_Rubrobacteria;o_Rubrobacteriales;f_Rubrobacteraceae;g_Rubrobacter;s__           | 1 | 3 | 1   | 108 | NA | NA | NA | NA |
| k_Bacteria;p_Actinobacteria;c_Thermoleophilia;o_Gaiellales;f__;g__;s__                                        | 1 | 5 | 1   | 243 | NA | NA | NA | NA |
| k_Bacteria;p_Actinobacteria;c_Thermoleophilia;o_Gaiellales;f_AK1AB1_02E;g__;s__                               | 1 | 4 | 8   | 79  | NA | NA | NA | NA |
| k_Bacteria;p_Actinobacteria;c_Thermoleophilia;o_Gaiellales;f_Gaiellaceae;g__;s__                              | 4 | 1 | 37  | 26  | NA | NA | NA | NA |
| k_Bacteria;p_Aquificae;c_Aquificae;o_Aquificales;f_Aquificaceae;g__;s__                                       | 4 | 1 | 45  | 2   | NA | NA | NA | NA |
| k_Bacteria;p_Armatimonadetes;c_[Fimbriimonadia];o_[Fimbriimonadales];f_[Fimbriimonadaceae];g_Fimbriimonas;s__ | 5 | 0 | 21  | 0   | NA | NA | NA | NA |
| k_Bacteria;p_Bacteroidetes;c_[Rhodothermi];o_[Rhodothermales];f_Rhodothermaceae;g_Rubricoccus;s__             | 0 | 2 | 0   | 724 | NA | NA | NA | NA |
| k_Bacteria;p_Bacteroidetes;c_[Saprospirae];o_[Saprospirales];f_Chitinophagaceae;g_Segetibacter;s__            | 1 | 2 | 29  | 39  | NA | NA | NA | NA |
| k_Bacteria;p_Bacteroidetes;c_Bacteroidia;o_Bacteroidales;f_BA008;g__;s__                                      | 0 | 1 | 0   | 57  | NA | NA | NA | NA |
| k_Bacteria;p_Bacteroidetes;c_Bacteroidia;o_Bacteroidales;f_Porphyrimonadaceae;g__;s__                         | 0 | 2 | 0   | 53  | NA | NA | NA | NA |
| k_Bacteria;p_Bacteroidetes;c_Bacteroidia;o_Bacteroidales;f_Porphyrimonadaceae;g_Dysgonomonas;s__              | 5 | 1 | 93  | 1   | NA | NA | NA | NA |
| k_Bacteria;p_Bacteroidetes;c_Bacteroidia;o_Bacteroidales;f_Porphyrimonadaceae;g_Tannerella;s__                | 3 | 0 | 43  | 0   | NA | NA | NA | NA |
| k_Bacteria;p_Bacteroidetes;c_Bacteroidia;o_Bacteroidales;f_S24-7;g__;s__                                      | 1 | 0 | 21  | 0   | NA | NA | NA | NA |
| k_Bacteria;p_Bacteroidetes;c_Cytophagia;o_Cytophagales;f_Cytophagaceae;g__;s__                                | 1 | 3 | 69  | 48  | NA | NA | NA | NA |
| k_Bacteria;p_Bacteroidetes;c_Cytophagia;o_Cytophagales;f_Cytophagaceae;g_Rhodocytophaga;s__                   | 1 | 0 | 78  | 0   | NA | NA | NA | NA |

|                                                                                                              |    |   |     |         |    |    |    |    |
|--------------------------------------------------------------------------------------------------------------|----|---|-----|---------|----|----|----|----|
| k_Bacteria;p_Bacteroidetes;c_Cytophagia;o_Cytophagales;f_Cytophagaceae;g_Rudanella;s__                       | 1  | 2 | 1   | 47<br>4 | NA | NA | NA | NA |
| k_Bacteria;p_Bacteroidetes;c_Flavobacteriia;o_Flavobacteriales;f_Cryomorphaceae;g_Fluviicola;s__             | 1  | 0 | 22  | 0       | NA | NA | NA | NA |
| k_Bacteria;p_Bacteroidetes;c_Flavobacteriia;o_Flavobacteriales;f_Flavobacteriaceae;g__;s__                   | 1  | 3 | 22  | 10<br>1 | NA | NA | NA | NA |
| k_Bacteria;p_Bacteroidetes;c_Flavobacteriia;o_Flavobacteriales;f_Flavobacteriaceae;g_Myroides;s__            | 2  | 0 | 27  | 0       | NA | NA | NA | NA |
| k_Bacteria;p_Bacteroidetes;c_Sphingobacteriia;o_Sphingobacteriales;f__;g__;s__                               | 1  | 1 | 44  | 13<br>7 | NA | NA | NA | NA |
| k_Bacteria;p_Chlamydiae;c_Chlamydia;o_Chlamydiales;f_Parachlamydiaceae;g__;s__                               | 1  | 6 | 1   | 18<br>1 | NA | NA | NA | NA |
| k_Bacteria;p_Chlamydiae;c_Chlamydia;o_Chlamydiales;f_Parachlamydiaceae;g_CandidatusProtochlamydia;s__        | 1  | 1 | 3   | 64<br>4 | NA | NA | NA | NA |
| k_Bacteria;p_Chlamydiae;c_Chlamydia;o_Chlamydiales;f_Parachlamydiaceae;g_Parachlamydia;s__                   | 0  | 1 | 0   | 22      | NA | NA | NA | NA |
| k_Bacteria;p_Chlamydiae;c_Chlamydia;o_Chlamydiales;f_Rhabdochlamydiaceae;g_CandidatusRhabdochlamydia;s__     | 0  | 1 | 0   | 97      | NA | NA | NA | NA |
| k_Bacteria;p_Chlorobi;c_Ignavibacteria;o_Ignavibacteriales;f_Ignavibacteriaceae;g__;s__                      | 0  | 1 | 0   | 71      | NA | NA | NA | NA |
| k_Bacteria;p_Chloroflexi;c__;o__;f__;g__;s__                                                                 | 0  | 6 | 0   | 34      | NA | NA | NA | NA |
| k_Bacteria;p_Chloroflexi;c_Anaerolineae;o_A31;f_S47;g__;s__                                                  | 0  | 4 | 0   | 49      | NA | NA | NA | NA |
| k_Bacteria;p_Chloroflexi;c_Anaerolineae;o_Anaerolineales;f_Anaerolinaceae;g_Anaerolinea;s__                  | 1  | 0 | 26  | 0       | NA | NA | NA | NA |
| k_Bacteria;p_Chloroflexi;c_Anaerolineae;o_Caldilineales;f_Caldilineaceae;g__;s__                             | 1  | 6 | 1   | 58      | NA | NA | NA | NA |
| k_Bacteria;p_Chloroflexi;c_Anaerolineae;o_Caldilineales;f_Caldilineaceae;g_Caldilinea;s__                    | 1  | 7 | 1   | 34<br>6 | NA | NA | NA | NA |
| k_Bacteria;p_Chloroflexi;c_Anaerolineae;o_H39;f__;g__;s__                                                    | 0  | 2 | 0   | 55      | NA | NA | NA | NA |
| k_Bacteria;p_Chloroflexi;c_Anaerolineae;o_SHA-20;f__;g__;s__                                                 | 0  | 2 | 0   | 93      | NA | NA | NA | NA |
| k_Bacteria;p_Chloroflexi;c_Chloroflexi;o_[Roseiflexales];f_[Kouleothrixaceae];g_Kouleothrix;s__              | 0  | 1 | 0   | 52      | NA | NA | NA | NA |
| k_Bacteria;p_Chloroflexi;c_Chloroflexi;o_AKIW781;f__;g__;s__                                                 | 2  | 0 | 40  | 0       | NA | NA | NA | NA |
| k_Bacteria;p_Chloroflexi;c_TK10;o_AKYG885;f_Dolo_23;g__;s__                                                  | 0  | 5 | 0   | 63      | NA | NA | NA | NA |
| k_Bacteria;p_Chloroflexi;c_TK17;o_mle1-48;f__;g__;s__                                                        | 0  | 4 | 0   | 88      | NA | NA | NA | NA |
| k_Bacteria;p_Cyanobacteria;c_4C0d-2;o_SM1D11;f__;g__;s__                                                     | 0  | 1 | 0   | 71      | NA | NA | NA | NA |
| k_Bacteria;p_Cyanobacteria;c_4C0d-2;o_YS2;f__;g__;s__                                                        | 1  | 5 | 1   | 11<br>7 | NA | NA | NA | NA |
| k_Bacteria;p_Cyanobacteria;c_Chloroplast;o_Chlorophyta;f_Chlamydomonadaceae;g__;s__                          | 0  | 2 | 0   | 74      | NA | NA | NA | NA |
| k_Bacteria;p_Cyanobacteria;c_Oscillatoriothrixaceae;o_Chroococcales;f__;g__;s__                              | 0  | 2 | 0   | 93      | NA | NA | NA | NA |
| k_Bacteria;p_Cyanobacteria;c_Oscillatoriothrixaceae;o_Chroococcales;f_Cyanobacteriaceae;g_Cyanobacterium;s__ | 0  | 1 | 0   | 24      | NA | NA | NA | NA |
| k_Bacteria;p_Cyanobacteria;c_Oscillatoriothrixaceae;o_Oscillatoriales;f_Phormidiaceae;g_Phormidium;s__       | 2  | 0 | 326 | 0       | NA | NA | NA | NA |
| k_Bacteria;p_Cyanobacteria;c_Synechococcophycidae;o_Pseudanabaenales;f__;g__;s__                             | 1  | 0 | 29  | 0       | NA | NA | NA | NA |
| k_Bacteria;p_Firmicutes;c__;o__;f__;g__;s__                                                                  | 2  | 0 | 26  | 0       | NA | NA | NA | NA |
| k_Bacteria;p_Firmicutes;c_Bacilli;o_Bacillales;f_Bacillaceae;g__;s__                                         | 11 | 1 | 75  | 77      | NA | NA | NA | NA |
| k_Bacteria;p_Firmicutes;c_Bacilli;o_Bacillales;f_Listeriaceae;g_Brochothrix;s__                              | 9  | 0 | 64  | 0       | NA | NA | NA | NA |

|                                                                                                          |    |   |     |     |    |    |    |    |
|----------------------------------------------------------------------------------------------------------|----|---|-----|-----|----|----|----|----|
| k_Bacteria;p_Firmicutes;c_Bacilli;o_Bacillales;f_Paenibacillaceae;g_Aneurinibacillus;s__                 | 1  | 1 | 1   | 31  | NA | NA | NA | NA |
| k_Bacteria;p_Firmicutes;c_Bacilli;o_Bacillales;f_Planococcaceae;g_Sporosarcina;s__                       | 4  | 1 | 5   | 4   | NA | NA | NA | NA |
| k_Bacteria;p_Firmicutes;c_Bacilli;o_Bacillales;f_Staphylococcaceae;g_Salinococcus;s__                    | 2  | 0 | 27  | 0   | NA | NA | NA | NA |
| k_Bacteria;p_Firmicutes;c_Bacilli;o_Gemellales;f__;g__;s__                                               | 16 | 0 | 32  | 0   | NA | NA | NA | NA |
| k_Bacteria;p_Firmicutes;c_Bacilli;o_Lactobacillales;f__;g__;s__                                          | 13 | 1 | 46  | 1   | NA | NA | NA | NA |
| k_Bacteria;p_Firmicutes;c_Bacilli;o_Lactobacillales;f_Aerococcaceae;g_Alkalibacterium;s__                | 7  | 0 | 294 | 0   | NA | NA | NA | NA |
| k_Bacteria;p_Firmicutes;c_Bacilli;o_Lactobacillales;f_Carnobacteriaceae;g_Trichococcus;s__               | 1  | 0 | 37  | 0   | NA | NA | NA | NA |
| k_Bacteria;p_Firmicutes;c_Bacilli;o_Lactobacillales;f_Enterococcaceae;g_Vagococcus;s__                   | 5  | 0 | 6   | 0   | NA | NA | NA | NA |
| k_Bacteria;p_Firmicutes;c_Bacilli;o_Lactobacillales;f_Lactobacillaceae;g__;s__                           | 6  | 0 | 390 | 0   | NA | NA | NA | NA |
| k_Bacteria;p_Firmicutes;c_Bacilli;o_Lactobacillales;f_Lactobacillaceae;g_Pediococcus;s__                 | 1  | 0 | 238 | 0   | NA | NA | NA | NA |
| k_Bacteria;p_Firmicutes;c_Bacilli;o_Lactobacillales;f_Leuconostocaceae;g_Leuconostoc;s__                 | 13 | 1 | 80  | 1   | NA | NA | NA | NA |
| k_Bacteria;p_Firmicutes;c_Bacilli;o_Lactobacillales;f_Leuconostocaceae;g_Weissella;s__                   | 4  | 1 | 9   | 3   | NA | NA | NA | NA |
| k_Bacteria;p_Firmicutes;c_Bacilli;o_Lactobacillales;f_Streptococcaceae;g__;s__                           | 1  | 2 | 1   | 46  | NA | NA | NA | NA |
| k_Bacteria;p_Firmicutes;c_Clostridia;o_Clostridiales;f_[Tissierellaceae];g__;s__                         | 3  | 0 | 35  | 0   | NA | NA | NA | NA |
| k_Bacteria;p_Firmicutes;c_Clostridia;o_Clostridiales;f_[Tissierellaceae];g_Helcococcus;s__               | 5  | 1 | 54  | 2   | NA | NA | NA | NA |
| k_Bacteria;p_Firmicutes;c_Clostridia;o_Clostridiales;f_[Tissierellaceae];g_ph2;s__                       | 13 | 0 | 103 | 0   | NA | NA | NA | NA |
| k_Bacteria;p_Firmicutes;c_Clostridia;o_Clostridiales;f_Christensenellaceae;g__;s__                       | 1  | 0 | 24  | 0   | NA | NA | NA | NA |
| k_Bacteria;p_Firmicutes;c_Clostridia;o_Clostridiales;f_Eubacteriaceae;g_Acetobacterium;s__               | 0  | 6 | 0   | 33  | NA | NA | NA | NA |
| k_Bacteria;p_Firmicutes;c_Clostridia;o_Clostridiales;f_Eubacteriaceae;g_Pseudoramibacter_Eubacterium;s__ | 0  | 4 | 0   | 88  | NA | NA | NA | NA |
| k_Bacteria;p_Firmicutes;c_Clostridia;o_Clostridiales;f_Lachnospiraceae;g_Shuttleworthia;s__              | 9  | 0 | 37  | 0   | NA | NA | NA | NA |
| k_Bacteria;p_Firmicutes;c_Clostridia;o_Clostridiales;f_Veillonellaceae;g__;s__                           | 0  | 3 | 0   | 114 | NA | NA | NA | NA |
| k_Bacteria;p_Firmicutes;c_Clostridia;o_Clostridiales;f_Veillonellaceae;g_Anaeromusa;s__                  | 0  | 3 | 0   | 41  | NA | NA | NA | NA |
| k_Bacteria;p_Firmicutes;c_Clostridia;o_Clostridiales;f_Veillonellaceae;g_Schwartzia;s__                  | 1  | 1 | 5   | 69  | NA | NA | NA | NA |
| k_Bacteria;p_Firmicutes;c_Clostridia;o_Clostridiales;f_Veillonellaceae;g_vadinHB04;s__                   | 0  | 1 | 0   | 34  | NA | NA | NA | NA |
| k_Bacteria;p_Fusobacteria;c_Fusobacteriia;o_Fusobacteriales;f__;g__;s__                                  | 1  | 1 | 1   | 87  | NA | NA | NA | NA |
| k_Bacteria;p_Fusobacteria;c_Fusobacteriia;o_Fusobacteriales;f_Fusobacteriaceae;g_u114;s__                | 0  | 5 | 0   | 17  | NA | NA | NA | NA |
| k_Bacteria;p_Gemmatimonadetes;c_Gemm-1;o__;f__;g__;s__                                                   | 0  | 1 | 0   | 43  | NA | NA | NA | NA |
| k_Bacteria;p_Gemmatimonadetes;c_Gemm-3;o__;f__;g__;s__                                                   | 2  | 0 | 48  | 0   | NA | NA | NA | NA |
| k_Bacteria;p_Gemmatimonadetes;c_Gemmatimonadetes;o__;f__;g__;s__                                         | 1  | 0 | 18  | 0   | NA | NA | NA | NA |
| k_Bacteria;p_Gemmatimonadetes;c_Gemmatimonadetes;o_Gemmatimonadales;f__;g__;s__                          | 0  | 2 | 0   | 153 | NA | NA | NA | NA |
| k_Bacteria;p_GN02;c_BD1-5;o__;f__;g__;s__                                                                | 1  | 1 | 1   | 69  | NA | NA | NA | NA |

|                                                                                                             |    |   |     |     |    |    |    |    |
|-------------------------------------------------------------------------------------------------------------|----|---|-----|-----|----|----|----|----|
| k_Bacteria;p_GN02;c_GKS2-174;o_;f_;g_;s__                                                                   | 0  | 1 | 0   | 26  | NA | NA | NA | NA |
| k_Bacteria;p_Kazan-3B-28;c_;o_;f_;g_;s__                                                                    | 0  | 2 | 0   | 36  | NA | NA | NA | NA |
| k_Bacteria;p_Nitrospirae;c_Nitrospira;o_Nitrospirales;f_Nitrospiraceae;g_Nitrospira;s__                     | 1  | 3 | 1   | 447 | NA | NA | NA | NA |
| k_Bacteria;p_OD1;c_;o_;f_;g_;s__                                                                            | 0  | 5 | 0   | 95  | NA | NA | NA | NA |
| k_Bacteria;p_OD1;c_ABY1;o_;f_;g_;s__                                                                        | 0  | 1 | 0   | 41  | NA | NA | NA | NA |
| k_Bacteria;p_OD1;c_SM2F11;o_;f_;g_;s__                                                                      | 0  | 1 | 0   | 176 | NA | NA | NA | NA |
| k_Bacteria;p_OP11;c_WCHB1-64;o_d153;f_;g_;s__                                                               | 1  | 1 | 19  | 30  | NA | NA | NA | NA |
| k_Bacteria;p_Planctomycetes;c_C6;o_d113;f_;g_;s__                                                           | 0  | 1 | 0   | 34  | NA | NA | NA | NA |
| k_Bacteria;p_Planctomycetes;c_Phycisphaerae;o_Phycisphaerales;f_;g_;s__                                     | 1  | 0 | 25  | 0   | NA | NA | NA | NA |
| k_Bacteria;p_Planctomycetes;c_Phycisphaerae;o_WD2101;f_;g_;s__                                              | 2  | 0 | 22  | 0   | NA | NA | NA | NA |
| k_Bacteria;p_Planctomycetes;c_Planctomycetia;o_B97;f_;g_;s__                                                | 1  | 5 | 1   | 73  | NA | NA | NA | NA |
| k_Bacteria;p_Planctomycetes;c_Planctomycetia;o_Gemmatales;f_Gemmataceae;g_;s__                              | 0  | 3 | 0   | 299 | NA | NA | NA | NA |
| k_Bacteria;p_Proteobacteria;c_Alphaproteobacteria;o_BD7-3;f_;g_;s__                                         | 0  | 2 | 0   | 145 | NA | NA | NA | NA |
| k_Bacteria;p_Proteobacteria;c_Alphaproteobacteria;o_Caulobacterales;f_Caulobacteraceae;g_Arthrospira;s__    | 4  | 1 | 5   | 4   | NA | NA | NA | NA |
| k_Bacteria;p_Proteobacteria;c_Alphaproteobacteria;o_Rhizobiales;f_Bradyrhizobiaceae;g_Balneimonas;s__       | 7  | 0 | 23  | 0   | NA | NA | NA | NA |
| k_Bacteria;p_Proteobacteria;c_Alphaproteobacteria;o_Rhizobiales;f_Brucellaceae;g_Ochrobactrum;s__           | 15 | 1 | 68  | 2   | NA | NA | NA | NA |
| k_Bacteria;p_Proteobacteria;c_Alphaproteobacteria;o_Rhizobiales;f_Hyphomicrobiaceae;g_Parvibaculum;s__      | 1  | 0 | 71  | 0   | NA | NA | NA | NA |
| k_Bacteria;p_Proteobacteria;c_Alphaproteobacteria;o_Rhizobiales;f_Hyphomicrobiaceae;g_Pedomicrobium;s__     | 0  | 3 | 0   | 49  | NA | NA | NA | NA |
| k_Bacteria;p_Proteobacteria;c_Alphaproteobacteria;o_Rhizobiales;f_Methylocystaceae;g_;s__                   | 5  | 0 | 36  | 0   | NA | NA | NA | NA |
| k_Bacteria;p_Proteobacteria;c_Alphaproteobacteria;o_Rhodobacterales;f_Rhodobacteraceae;g_Jannaschia;s__     | 0  | 2 | 0   | 32  | NA | NA | NA | NA |
| k_Bacteria;p_Proteobacteria;c_Alphaproteobacteria;o_Rhodobacterales;f_Rhodobacteraceae;g_Rhodobacter;s__    | 1  | 6 | 1   | 57  | NA | NA | NA | NA |
| k_Bacteria;p_Proteobacteria;c_Alphaproteobacteria;o_Rhodospirillales;f_Acetobacteraceae;g_Roseococcus;s__   | 1  | 3 | 1   | 110 | NA | NA | NA | NA |
| k_Bacteria;p_Proteobacteria;c_Alphaproteobacteria;o_Rhodospirillales;f_Rhodospirillaceae;g_Azospirillum;s__ | 1  | 3 | 2   | 71  | NA | NA | NA | NA |
| k_Bacteria;p_Proteobacteria;c_Alphaproteobacteria;o_Rickettsiales;f_mitochondria;g_;s__                     | 17 | 0 | 555 | 0   | NA | NA | NA | NA |
| k_Bacteria;p_Proteobacteria;c_Alphaproteobacteria;o_Rickettsiales;f_Rickettsiaceae;g_;s__                   | 1  | 5 | 1   | 131 | NA | NA | NA | NA |
| k_Bacteria;p_Proteobacteria;c_Alphaproteobacteria;o_Sphingomonadales;f_Sphingomonadaceae;g_Zymomonas;s__    | 0  | 3 | 0   | 40  | NA | NA | NA | NA |
| k_Bacteria;p_Proteobacteria;c_Betaproteobacteria;o_;f_;g_;s__                                               | 0  | 1 | 0   | 40  | NA | NA | NA | NA |
| k_Bacteria;p_Proteobacteria;c_Betaproteobacteria;o_ASSO-13;f_;g_;s__                                        | 1  | 4 | 1   | 103 | NA | NA | NA | NA |
| k_Bacteria;p_Proteobacteria;c_Betaproteobacteria;o_Burkholderiales;f_;g_;s__                                | 0  | 3 | 0   | 64  | NA | NA | NA | NA |
| k_Bacteria;p_Proteobacteria;c_Betaproteobacteria;o_Burkholderiales;f_Burkholderiaceae;g_;s__                | 0  | 2 | 0   | 33  | NA | NA | NA | NA |
| k_Bacteria;p_Proteobacteria;c_Betaproteobacteria;o_Burkholderiales;f_Comamonadaceae;g_Variovorax;s__        | 5  | 0 | 9   | 0   | NA | NA | NA | NA |

|                                                                                                                     |    |   |    |      |    |    |    |    |
|---------------------------------------------------------------------------------------------------------------------|----|---|----|------|----|----|----|----|
| k_Bacteria;p_Proteobacteria;c_Betaproteobacteria;o_Ellin6067;f__;g__;s__                                            | 0  | 3 | 0  | 23   | NA | NA | NA | NA |
| k_Bacteria;p_Proteobacteria;c_Betaproteobacteria;o_Hydrogenophilales;f_Hydrogenophilaceae;g_Thiobacillus;s__        | 9  | 1 | 43 | 7    | NA | NA | NA | NA |
| k_Bacteria;p_Proteobacteria;c_Betaproteobacteria;o_Neisseriales;f_Neisseriaceae;g_Microvirgula;s__                  | 0  | 2 | 0  | 42   | NA | NA | NA | NA |
| k_Bacteria;p_Proteobacteria;c_Betaproteobacteria;o_Nitrosomonadales;f_Nitrosomonadaceae;g__;s__                     | 1  | 4 | 1  | 145  | NA | NA | NA | NA |
| k_Bacteria;p_Proteobacteria;c_Betaproteobacteria;o_Procabbacteriales;f_Procabbacteriaceae;g__;s__                   | 1  | 4 | 1  | 377  | NA | NA | NA | NA |
| k_Bacteria;p_Proteobacteria;c_Betaproteobacteria;o_Rhodocyclales;f_Rhodocyclaceae;g_C39;s__                         | 0  | 3 | 0  | 51   | NA | NA | NA | NA |
| k_Bacteria;p_Proteobacteria;c_Betaproteobacteria;o_Rhodocyclales;f_Rhodocyclaceae;g_Hydrogenophilus;s__             | 9  | 0 | 61 | 0    | NA | NA | NA | NA |
| k_Bacteria;p_Proteobacteria;c_Betaproteobacteria;o_SC-I-84;f__;g__;s__                                              | 0  | 6 | 0  | 232  | NA | NA | NA | NA |
| k_Bacteria;p_Proteobacteria;c_Deltaproteobacteria;o__;f__;g__;s__                                                   | 0  | 2 | 0  | 143  | NA | NA | NA | NA |
| k_Bacteria;p_Proteobacteria;c_Deltaproteobacteria;o_Bdellovibrionales;f_Bacteriovoraceae;g__;s__                    | 4  | 1 | 64 | 73   | NA | NA | NA | NA |
| k_Bacteria;p_Proteobacteria;c_Deltaproteobacteria;o_Desulfobacterales;f_Desulfobulbaceae;g_Desulfobulbus;s__        | 1  | 2 | 11 | 65   | NA | NA | NA | NA |
| k_Bacteria;p_Proteobacteria;c_Deltaproteobacteria;o_FAC87;f__;g__;s__                                               | 0  | 1 | 0  | 38   | NA | NA | NA | NA |
| k_Bacteria;p_Proteobacteria;c_Deltaproteobacteria;o_MIZ46;f__;g__;s__                                               | 0  | 1 | 0  | 30   | NA | NA | NA | NA |
| k_Bacteria;p_Proteobacteria;c_Deltaproteobacteria;o_Myxococcales;f_OM27;g__;s__                                     | 3  | 0 | 20 | 0    | NA | NA | NA | NA |
| k_Bacteria;p_Proteobacteria;c_Deltaproteobacteria;o_Myxococcales;f_Polyangiaceae;g__;s__                            | 0  | 2 | 0  | 137  | NA | NA | NA | NA |
| k_Bacteria;p_Proteobacteria;c_Deltaproteobacteria;o_NB1-j;f_JTB38;g__;s__                                           | 0  | 1 | 0  | 37   | NA | NA | NA | NA |
| k_Bacteria;p_Proteobacteria;c_Deltaproteobacteria;o_NKB15;f__;g__;s__                                               | 0  | 3 | 0  | 28   | NA | NA | NA | NA |
| k_Bacteria;p_Proteobacteria;c_Deltaproteobacteria;o_Spirochillales;f__;g__;s__                                      | 0  | 3 | 0  | 1918 | NA | NA | NA | NA |
| k_Bacteria;p_Proteobacteria;c_Deltaproteobacteria;o_Syntrophobacterales;f_Syntrophaceae;g_Desulfomonile;s__         | 0  | 3 | 0  | 39   | NA | NA | NA | NA |
| k_Bacteria;p_Proteobacteria;c_Deltaproteobacteria;o_Syntrophobacterales;f_Syntrophorhabdaceae;g__;s__               | 0  | 1 | 0  | 23   | NA | NA | NA | NA |
| k_Bacteria;p_Proteobacteria;c_Epsilonproteobacteria;o_Campylobacterales;f_Campylobacteraceae;g_Sulfurospirillum;s__ | 0  | 3 | 0  | 42   | NA | NA | NA | NA |
| k_Bacteria;p_Proteobacteria;c_Epsilonproteobacteria;o_Campylobacterales;f_Helicobacteraceae;g__;s__                 | 1  | 2 | 1  | 24   | NA | NA | NA | NA |
| k_Bacteria;p_Proteobacteria;c_Gammaproteobacteria;o__;f__;g__;s__                                                   | 4  | 0 | 27 | 0    | NA | NA | NA | NA |
| k_Bacteria;p_Proteobacteria;c_Gammaproteobacteria;o_Aeromonadales;f_Aeromonadaceae;g_Tolomonas;s__                  | 1  | 2 | 7  | 194  | NA | NA | NA | NA |
| k_Bacteria;p_Proteobacteria;c_Gammaproteobacteria;o_Alteromonadales;f_[Chromatiaceae];g__;s__                       | 6  | 0 | 9  | 0    | NA | NA | NA | NA |
| k_Bacteria;p_Proteobacteria;c_Gammaproteobacteria;o_Alteromonadales;f_OM60;g__;s__                                  | 0  | 1 | 0  | 21   | NA | NA | NA | NA |
| k_Bacteria;p_Proteobacteria;c_Gammaproteobacteria;o_Chromatiales;f_Chromatiaceae;g_Allochromatium;s__               | 0  | 1 | 0  | 116  | NA | NA | NA | NA |
| k_Bacteria;p_Proteobacteria;c_Gammaproteobacteria;o_Chromatiales;f_Halothiobacillaceae;g_Thiovirga;s__              | 0  | 1 | 0  | 123  | NA | NA | NA | NA |
| k_Bacteria;p_Proteobacteria;c_Gammaproteobacteria;o_Enterobacterales;f_Enterobacteriaceae;g_Buchnera;s__            | 1  | 0 | 29 | 0    | NA | NA | NA | NA |
| k_Bacteria;p_Proteobacteria;c_Gammaproteobacteria;o_Enterobacterales;f_Enterobacteriaceae;g_Citrobacter;s__         | 10 | 0 | 26 | 0    | NA | NA | NA | NA |
| k_Bacteria;p_Proteobacteria;c_Gammaproteobacteria;o_Enterobacterales;f_Enterobacteriaceae;g_Yersinia;s__            | 6  | 0 | 9  | 0    | NA | NA | NA | NA |

|                                                                                                                           |    |   |    |      |    |    |    |    |
|---------------------------------------------------------------------------------------------------------------------------|----|---|----|------|----|----|----|----|
| k_Bacteria;p_Proteobacteria;c_Gammaproteobacteria;o_HOC36;f_g_s                                                           | 0  | 2 | 0  | 888  | NA | NA | NA | NA |
| k_Bacteria;p_Proteobacteria;c_Gammaproteobacteria;o_Legionellales;f_g_s                                                   | 1  | 7 | 5  | 1471 | NA | NA | NA | NA |
| k_Bacteria;p_Proteobacteria;c_Gammaproteobacteria;o_Legionellales;f_Coxiellaceae;g_s                                      | 0  | 5 | 0  | 326  | NA | NA | NA | NA |
| k_Bacteria;p_Proteobacteria;c_Gammaproteobacteria;o_Legionellales;f_Coxiellaceae;g_Aquicella;s                            | 1  | 7 | 6  | 1922 | NA | NA | NA | NA |
| k_Bacteria;p_Proteobacteria;c_Gammaproteobacteria;o_Legionellales;f_Francisellaceae;g_s                                   | 0  | 1 | 0  | 23   | NA | NA | NA | NA |
| k_Bacteria;p_Proteobacteria;c_Gammaproteobacteria;o_Legionellales;f_Legionellaceae;g_Legionella;s                         | 1  | 5 | 1  | 479  | NA | NA | NA | NA |
| k_Bacteria;p_Proteobacteria;c_Gammaproteobacteria;o_Legionellales;f_Legionellaceae;g_Tatlockia;s                          | 0  | 1 | 0  | 32   | NA | NA | NA | NA |
| k_Bacteria;p_Proteobacteria;c_Gammaproteobacteria;o_Methylococcales;f_Methylococcaceae;g_Methylocaldum;s                  | 0  | 2 | 0  | 197  | NA | NA | NA | NA |
| k_Bacteria;p_Proteobacteria;c_Gammaproteobacteria;o_Oceanospirillales;f_Halomonadaceae;g_s                                | 1  | 0 | 62 | 0    | NA | NA | NA | NA |
| k_Bacteria;p_Proteobacteria;c_Gammaproteobacteria;o_Thiotrichales;f_Thiotrichaceae;g_Thiothrix;s                          | 0  | 3 | 0  | 37   | NA | NA | NA | NA |
| k_Bacteria;p_Proteobacteria;c_Gammaproteobacteria;o_Vibrionales;f_Vibrionaceae;g_Photobacterium;s                         | 5  | 0 | 73 | 0    | NA | NA | NA | NA |
| k_Bacteria;p_Proteobacteria;c_Gammaproteobacteria;o_Xanthomonadales;f_Xanthomonadaceae;g_Luteimonas;s                     | 3  | 0 | 35 | 0    | NA | NA | NA | NA |
| k_Bacteria;p_Spirochaetes;c_Spirochaetes;o_Sphaerochaetales;f_Sphaerochaetaceae;g_Sphaerochaeta;s                         | 0  | 2 | 0  | 140  | NA | NA | NA | NA |
| k_Bacteria;p_TM6;c_SJA-4;o_S1198;f_g_s                                                                                    | 0  | 4 | 0  | 112  | NA | NA | NA | NA |
| k_Bacteria;p_TM7;c_TM7-3;o_CW040;f_g_s                                                                                    | 6  | 1 | 99 | 2    | NA | NA | NA | NA |
| k_Bacteria;p_TM7;c_TM7-3;o_I025;f_g_s                                                                                     | 1  | 1 | 1  | 185  | NA | NA | NA | NA |
| k_Bacteria;p_Verrucomicrobia;c_[Spartobacteria];o_[Chthoniobacterales];f_[Chthoniobacteraceae];g_DA101;s                  | 1  | 0 | 47 | 0    | NA | NA | NA | NA |
| k_Bacteria;p_WS3;c_PRR-12;o_Sediment-1;f_PRR-10;g_s                                                                       | 0  | 1 | 0  | 23   | NA | NA | NA | NA |
| k_Bacteria;p_WS6;c_SC72;o_WCHB1-15;f_g_s                                                                                  | 0  | 3 | 0  | 29   | NA | NA | NA | NA |
| k_Bacteria;p_Chlamydiae;c_Chlamydia;o_Chlamydiales;f_Parachlamydiaceae;g_Parachlamydia;s_acanthamoebae                    | 0  | 2 | 0  | 133  | NA | NA | NA | NA |
| k_Bacteria;p_Firmicutes;c_Clostridia;o_Clostridiales;f_Peptostreptococcaceae;g_Peptostreptococcus;s_anaerobius            | 5  | 0 | 17 | 0    | NA | NA | NA | NA |
| k_Bacteria;p_Synergistetes;c_Synergistia;o_Synergistales;f_Dethiosulfovibrionaceae;g_Jonquetella;s_anthropi               | 1  | 0 | 65 | 0    | NA | NA | NA | NA |
| k_Bacteria;p_Actinobacteria;c_Actinobacteria;o_Actinomycetales;f_Mycobacteriaceae;g_Mycobacterium;s_arupense              | 1  | 3 | 1  | 25   | NA | NA | NA | NA |
| k_Bacteria;p_Proteobacteria;c_Deltaproteobacteria;o_Bdellovibrionales;f_Bdellovibrionaceae;g_Bdellovibrio;s_bacteriovorus | 0  | 1 | 0  | 78   | NA | NA | NA | NA |
| k_Bacteria;p_Actinobacteria;c_Actinobacteria;o_Actinomycetales;f_Corynebacteriaceae;g_Corynebacterium;s_bovis             | 2  | 0 | 22 | 0    | NA | NA | NA | NA |
| k_Bacteria;p_Proteobacteria;c_Gammaproteobacteria;o_Xanthomonadales;f_Xanthomonadaceae;g_Lysobacter;s_brunescens          | 0  | 2 | 0  | 104  | NA | NA | NA | NA |
| k_Bacteria;p_Proteobacteria;c_Betaproteobacteria;o_Neisseriales;f_Neisseriaceae;g_Neisseria;s_cinerea                     | 1  | 2 | 10 | 39   | NA | NA | NA | NA |
| k_Bacteria;p_Proteobacteria;c_Betaproteobacteria;o_Burkholderiales;f_Oxalobacteraceae;g_Polynucleobacter;s_cosmopolitanus | 0  | 2 | 0  | 139  | NA | NA | NA | NA |
| k_Bacteria;p_Bacteroidetes;c_Bacteroidia;o_Bacteroidales;f_Porphyrionadaceae;g_Parabacteroides;s_distans                  | 5  | 1 | 15 | 7    | NA | NA | NA | NA |
| k_Bacteria;p_Bacteroidetes;c_Bacteroidia;o_Bacteroidales;f_Porphyrionadaceae;g_Porphyrionas;s_endodontalis                | 10 | 1 | 42 | 2    | NA | NA | NA | NA |
| k_Bacteria;p_Actinobacteria;c_Actinobacteria;o_Actinomycetales;f_Actinomycetaceae;g_Actinomyces;s_europaeus               | 4  | 1 | 74 | 15   | NA | NA | NA | NA |



|                                                                                                                          |    |   |     |     |    |    |    |    |
|--------------------------------------------------------------------------------------------------------------------------|----|---|-----|-----|----|----|----|----|
| k_Bacteria;p_Bacteroidetes;c_Flavobacteriia;o_Flavobacteriales;f_Flavobacteriaceae;g_Flavobacterium;s_frigidarium        | 6  | 0 | 7   | 0   | NA | NA | NA | NA |
| k_Bacteria;p_Proteobacteria;c_Gammaproteobacteria;o_Pasteurellales;f_Pasteurellaceae;g_Haemophilus;s_influenzae          | 6  | 0 | 748 | 0   | NA | NA | NA | NA |
| k_Bacteria;p_Actinobacteria;c_Actinobacteria;o_Actinomycetales;f_Microbacteriaceae;g_Agrococcus;s_jenensis               | 9  | 1 | 19  | 14  | NA | NA | NA | NA |
| k_Bacteria;p_Proteobacteria;c_Alphaproteobacteria;o_Rhizobiales;f_Rhizobiaceae;g_Rhizobium;s_leguminosarum               | 13 | 0 | 333 | 0   | NA | NA | NA | NA |
| k_Bacteria;p_Firmicutes;c_Bacilli;o_Lactobacillales;f_Leuconostocaceae;g_Leuconostoc;s_mesenteroides                     | 7  | 1 | 18  | 68  | NA | NA | NA | NA |
| k_Bacteria;p_Proteobacteria;c_Betaproteobacteria;o_Methylotrophiales;f_Methylotrichaceae;g_Methylotenera;s_mobilis       | 1  | 6 | 3   | 535 | NA | NA | NA | NA |
| k_Bacteria;p_Verrucomicrobia;c_Verrucomicrobiae;o_Verrucomicrobiales;f_Verrucomicrobiaceae;g_Akkermansia;s_muciniphila   | 1  | 4 | 1   | 9   | NA | NA | NA | NA |
| k_Bacteria;p_Bacteroidetes;c_Sphingobacteriia;o_Sphingobacteriales;f_Sphingobacteriaceae;g_Sphingobacterium;s_multivorum | 15 | 1 | 130 | 4   | NA | NA | NA | NA |
| k_Bacteria;p_Firmicutes;c_Bacilli;o_Lactobacillales;f_Aerococcaceae;g_Alloiococcus;s_otitis                              | 6  | 0 | 46  | 0   | NA | NA | NA | NA |
| k_Bacteria;p_Actinobacteria;c_Actinobacteria;o_Actinomycetales;f_Micrococcaceae;g_Kocuria;s_palustris                    | 5  | 1 | 8   | 2   | NA | NA | NA | NA |
| k_Bacteria;p_Firmicutes;c_Bacilli;o_Bacillales;f_Staphylococcaceae;g_Staphylococcus;s_pettenkoferi                       | 6  | 0 | 15  | 0   | NA | NA | NA | NA |
| k_Bacteria;p_Synergistetes;c_Synergistia;o_Synergistales;f_Dethiosulfovibrionaceae;g_Pyramidobacter;s_piscicola          | 0  | 1 | 0   | 70  | NA | NA | NA | NA |
| k_Bacteria;p_Actinobacteria;c_Actinobacteria;o_Actinomycetales;f_Micrococcaceae;g_Arthrobacter;s_psychrolactophilus      | 5  | 1 | 22  | 2   | NA | NA | NA | NA |
| k_Bacteria;p_Firmicutes;c_Bacilli;o_Bacillales;f_Staphylococcaceae;g_Jeotgaliococcus;s_psychrophilus                     | 8  | 0 | 33  | 0   | NA | NA | NA | NA |
| k_Bacteria;p_Firmicutes;c_Bacilli;o_Lactobacillales;f_Aerococcaceae;g_Marinilactibacillus;s_psychrotolerans              | 2  | 0 | 44  | 0   | NA | NA | NA | NA |
| k_Bacteria;p_Proteobacteria;c_Gammaproteobacteria;o_Pseudomonadales;f_Moraxellaceae;g_Acinetobacter;s_rhizosphaerae      | 29 | 1 | 184 | 2   | NA | NA | NA | NA |
| k_Bacteria;p_Actinobacteria;c_Actinobacteria;o_Actinomycetales;f_Micrococcaceae;g_Microbispora;s_rosea                   | 10 | 1 | 76  | 91  | NA | NA | NA | NA |
| k_Bacteria;p_Proteobacteria;c_Gammaproteobacteria;o_Pseudomonadales;f_Moraxellaceae;g_Acinetobacter;s_schindleri         | 5  | 0 | 193 | 0   | NA | NA | NA | NA |
| k_Bacteria;p_Firmicutes;c_Bacilli;o_Bacillales;f_Staphylococcaceae;g_Staphylococcus;s_sciuri                             | 11 | 1 | 43  | 79  | NA | NA | NA | NA |
| k_Bacteria;p_Firmicutes;c_Bacilli;o_Bacillales;f_Bacillaceae;g_Bacillus;s_selenatarsenatis                               | 8  | 0 | 85  | 0   | NA | NA | NA | NA |
| k_Bacteria;p_Firmicutes;c_Bacilli;o_Lactobacillales;f_Streptococcaceae;g_Streptococcus;s_sobrinus                        | 2  | 1 | 72  | 1   | NA | NA | NA | NA |
| k_Bacteria;p_Spirochaetes;c_Spirochaetes;o_Spirochaetales;f_Spirochaetaceae;g_Treponema;s_socranskii                     | 1  | 2 | 1   | 33  | NA | NA | NA | NA |
| k_Bacteria;p_Bacteroidetes;c_Flavobacteriia;o_Flavobacteriales;f_Flavobacteriaceae;g_Flavobacterium;s_succinicans        | 10 | 1 | 17  | 2   | NA | NA | NA | NA |
| k_Bacteria;p_Actinobacteria;c_Actinobacteria;o_Actinomycetales;f_Corynebacteriaceae;g_Corynebacterium;s_variabile        | 15 | 1 | 102 | 1   | NA | NA | NA | NA |
| k_Bacteria;p_Proteobacteria;c_Alphaproteobacteria;o_Sphingomonadales;f_Sphingomonadaceae;g_Sphingomonas;s_wittichii      | 5  | 0 | 111 | 0   | NA | NA | NA | NA |
| k_Bacteria;p_Proteobacteria;c_Alphaproteobacteria;o_Sphingomonadales;f_Sphingomonadaceae;g_Sphingomonas;s_yabuuchiae     | 3  | 1 | 22  | 30  | NA | NA | NA | NA |

**eTable 2.** Association of Taxa Abundance With Composite Infectious Outcome

| taxa                                                                                                                          | rank cluster | rank infection | infection q-value | infection OR | infection lower 95 | infection upper 95 |
|-------------------------------------------------------------------------------------------------------------------------------|--------------|----------------|-------------------|--------------|--------------------|--------------------|
| k__Bacteria;p__Proteobacteria;c__Gammaproteobacteria;o__Pasteurellales;f__Pasteurellaceae;g__Aggregatibacter;s__segnis        | 177          | 1              | 1.148 E-03        | 1.610        | 1.336              | 1.986              |
| k__Bacteria;p__Proteobacteria;c__Gammaproteobacteria;o__Pseudomonadales;f__Moraxellaceae;g__Moraxella;s__                     | 19           | 2              | 1.302 E-03        | 1.162        | 1.091              | 1.240              |
| k__Bacteria;p__Proteobacteria;c__Alphaproteobacteria;o__f__;g__;s__                                                           | 269          | 3              | 4.397 E-03        | 0.741        | 0.641              | 0.848              |
| k__Bacteria;p__Proteobacteria;c__Gammaproteobacteria;o__Enterobacteriales;f__Enterobacteriaceae;g__Salmonella;s__             | 111          | 4              | 5.636 E-03        | 1.626        | 1.305              | 2.086              |
| k__Bacteria;p__Firmicutes;c__Bacilli;o__Bacillales;f__Staphylococcaceae;g__Jeotgalicoccus;s__                                 | 142          | 5              | 1.055 E-02        | 1.320        | 1.151              | 1.530              |
| k__Bacteria;p__Actinobacteria;c__Actinobacteria;o__Actinomycetales;f__Propionibacteriaceae;g__;s__                            | 189          | 6              | 1.055 E-02        | 1.417        | 1.190              | 1.702              |
| k__Bacteria;p__Bacteroidetes;c__Bacteroidia;o__Bacteroidales;f__[Paraprevotellaceae];g__[Prevotella];s__                      | 153          | 7              | 1.055 E-02        | 1.269        | 1.124              | 1.437              |
| k__Bacteria;p__Proteobacteria;c__Alphaproteobacteria;o__Rhizobiales;f__Rhizobiaceae;g__;s__                                   | 307          | 8              | 1.284 E-02        | 0.454        | 0.284              | 0.659              |
| k__Bacteria;p__Proteobacteria;c__Betaproteobacteria;o__Burkholderiales;f__Comamonadaceae;g__Variovorax;s__paradoxus           | 303          | 9              | 1.284 E-02        | 1.410        | 1.182              | 1.703              |
| k__Bacteria;p__Firmicutes;c__Clostridia;o__Clostridiales;f__Peptococcaceae;g__Peptococcus;s__                                 | 131          | 10             | 1.302 E-02        | 1.594        | 1.255              | 2.081              |
| k__Bacteria;p__Actinobacteria;c__Actinobacteria;o__Actinomycetales;f__Propionibacteriaceae;g__Propionibacterium;s__acnes      | 253          | 11             | 1.302 E-02        | 0.818        | 0.732              | 0.910              |
| k__Bacteria;p__Proteobacteria;c__Betaproteobacteria;o__Burkholderiales;f__Oxalobacteraceae;g__Janthinobacterium;s__lividum    | 311          | 12             | 1.302 E-02        | 1.277        | 1.121              | 1.461              |
| k__Bacteria;p__Proteobacteria;c__Gammaproteobacteria;o__Pasteurellales;f__Pasteurellaceae;g__Haemophilus;s__                  | 119          | 13             | 1.328 E-02        | 1.158        | 1.072              | 1.258              |
| k__Bacteria;p__Actinobacteria;c__Actinobacteria;o__Actinomycetales;f__Propionibacteriaceae;g__Propionibacterium;s__granulosum | 51           | 14             | 1.557 E-02        | 0.706        | 0.580              | 0.854              |
| k__Bacteria;p__Firmicutes;c__Clostridia;o__Clostridiales;f__Ruminococcaceae;g__;s__                                           | 93           | 15             | 1.629 E-02        | 0.774        | 0.666              | 0.888              |
| k__Bacteria;p__Bacteroidetes;c__Flavobacteriia;o__Flavobacteriales;f__Flavobacteriaceae;g__Capnocytophaga;s__ochracea         | 197          | 16             | 1.629 E-02        | 2.563        | 1.603              | 4.809              |
| k__Bacteria;p__Firmicutes;c__Clostridia;o__Clostridiales;f__[Tissierellaceae];g__Finegoldia;s__                               | 132          | 17             | 1.629 E-02        | 0.866        | 0.798              | 0.939              |
| k__Bacteria;p__Proteobacteria;c__Gammaproteobacteria;o__Enterobacteriales;f__Enterobacteriaceae;g__Morganella;s__             | 194          | 18             | 1.629 E-02        | 0.743        | 0.622              | 0.871              |
| k__Bacteria;p__Cyanobacteria;c__Chloroplast;o__Streptophyta;f__;g__;s__                                                       | 316          | 19             | 1.931 E-02        | 1.160        | 1.066              | 1.265              |
| k__Bacteria;p__Proteobacteria;c__Alphaproteobacteria;o__Sphingomonadales;f__Sphingomonadaceae;g__Novosphingobium;s__          | 33           | 20             | 2.017 E-02        | 0.719        | 0.586              | 0.863              |
| k__Bacteria;p__Firmicutes;c__Clostridia;o__Clostridiales;f__[Tissierellaceae];g__Anaerococcus;s__                             | 56           | 21             | 2.017 E-02        | 0.864        | 0.792              | 0.940              |
| k__Bacteria;p__Proteobacteria;c__Alphaproteobacteria;o__Rhizobiales;f__Bradyrhizobiaceae;g__Bosea;s__genosp.                  | 285          | 22             | 2.067 E-02        | 0.607        | 0.440              | 0.794              |
| k__Bacteria;p__Proteobacteria;c__Gammaproteobacteria;o__Xanthomonadales;f__Xanthomonadaceae;g__;s__                           | 231          | 23             | 2.091 E-02        | 0.839        | 0.755              | 0.929              |
| k__Bacteria;p__Actinobacteria;c__Actinobacteria;o__Actinomycetales;f__Brevibacteriaceae;g__Brevibacterium;s__                 | 314          | 24             | 2.298 E-02        | 1.236        | 1.090              | 1.405              |
| k__Bacteria;p__Actinobacteria;c__Actinobacteria;o__Actinomycetales;f__Propionibacteriaceae;g__Propionibacterium;s__           | 18           | 25             | 2.298 E-02        | 0.862        | 0.788              | 0.941              |
| k__Bacteria;p__Proteobacteria;c__Deltaproteobacteria;o__Desulfobacterales;f__Desulfobulbaceae;g__Desulfobulbus;s__            | 476          | 26             | 2.395 E-02        | 2.068        | 1.466              | 3.868              |
| k__Bacteria;p__Actinobacteria;c__Actinobacteria;o__Actinomycetales;f__Geodermatophilaceae;g__Modestobacter;s__                | 263          | 27             | 2.484 E-02        | 0.484        | 0.290              | 0.714              |
| k__Bacteria;p__Proteobacteria;c__Alphaproteobacteria;o__Rhizobiales;f__Phyllobacteriaceae;g__Phyllobacterium;s__              | 274          | 28             | 2.484 E-02        | 1.285        | 1.105              | 1.502              |
| k__Bacteria;p__Actinobacteria;c__Actinobacteria;o__Actinomycetales;f__Actinomycetaceae;g__;s__                                | 184          | 29             | 2.484 E-02        | 0.449        | 0.252              | 0.686              |

|                                                                                                                         |     |    |               |       |       |       |
|-------------------------------------------------------------------------------------------------------------------------|-----|----|---------------|-------|-------|-------|
| k_Bacteria;p_Firmicutes;c_Bacilli;o_Lactobacillales;f_Aerococaceae;g_Facklamia;s                                        | 179 | 30 | 2.861<br>E-02 | 1.252 | 1.090 | 1.440 |
| k_Bacteria;p_Firmicutes;c_Bacilli;o_Lactobacillales;f_Aerococaceae;g_Aerococcus;s                                       | 315 | 31 | 2.960<br>E-02 | 0.565 | 0.376 | 0.777 |
| k_Bacteria;p_Fusobacteria;c_Fusobacteriia;o_Fusobacteriales;f_Fusobacteriaceae;g_u114;s                                 | 429 | 32 | 2.960<br>E-02 | 0.266 | 0.098 | 0.541 |
| k_Bacteria;p_Proteobacteria;c_Gammaproteobacteria;o_Pasteurellales;f_Pasteurellaceae;g_Actinobacillus;s_parahaeolyticus | 276 | 33 | 3.403<br>E-02 | 1.435 | 1.156 | 1.839 |
| k_Bacteria;p_Actinobacteria;c_Actinobacteria;o_Bifidobacteriales;f_Bifidobacteriaceae;g_Scardovia;s                     | 145 | 34 | 3.784<br>E-02 | 1.361 | 1.126 | 1.684 |
| k_Bacteria;p_Actinobacteria;c_Coriobacteriia;o_Coriobacteriales;f_Coriobacteriaceae;g_Atopobium;s                       | 40  | 35 | 3.794<br>E-02 | 1.190 | 1.064 | 1.332 |
| k_Bacteria;p_Synergistetes;c_Synergistia;o_Synergistales;f_Synergistaceae;g_vadinCA02;s                                 | 165 | 36 | 3.866<br>E-02 | 0.341 | 0.131 | 0.596 |
| k_Bacteria;p_Firmicutes;c_Clostridia;o_Clostridiales;f_Lachnospiraceae;g_Catonella;s                                    | 139 | 37 | 3.866<br>E-02 | 1.415 | 1.148 | 1.822 |
| k_Bacteria;p_Proteobacteria;c_Alphaproteobacteria;o_Rhodobacterales;f_Rhodobacteraceae;g_Paracoccus;s                   | 160 | 38 | 4.210<br>E-02 | 1.211 | 1.068 | 1.375 |
| k_Bacteria;p_Firmicutes;c_Erysipelotrichi;o_Erysipelotrichales;f_Erysipelotrichaceae;g_Bulleidia;s                      | 76  | 39 | 4.210<br>E-02 | 1.261 | 1.086 | 1.479 |
| k_Bacteria;p_Firmicutes;c_Bacilli;o_Bacillales;f_Staphylococaceae;g_Staphylococcus;s_aureus                             | 239 | 40 | 4.244<br>E-02 | 0.834 | 0.738 | 0.939 |
| k_Bacteria;p_Firmicutes;c_Clostridia;o_Clostridiales;f_[Tissierellaceae];g_Parvimonas;s                                 | 16  | 41 | 4.453<br>E-02 | 1.168 | 1.053 | 1.296 |
| k_Bacteria;p_Proteobacteria;c_Gammaproteobacteria;o_Alteromonadales;f_Shewanellaceae;g_Shewanella;s                     | 260 | 42 | 4.794<br>E-02 | 0.618 | 0.432 | 0.834 |
| k_Bacteria;p_Firmicutes;c_Bacilli;o_Lactobacillales;f_;g_;s                                                             | 408 | 43 | 4.833<br>E-02 | 0.281 | 0.099 | 0.577 |
| k_Bacteria;p_Firmicutes;c_Bacilli;o_Bacillales;f_Planococcaceae;g_Sporosarcina;s                                        | 405 | 44 | 5.180<br>E-02 | 2.036 | 1.337 | 3.718 |
| k_Bacteria;p_Firmicutes;c_Bacilli;o_Bacillales;f_Staphylococaceae;g_Staphylococcus;s_sciuri                             | 546 | 45 | 5.379<br>E-02 | 1.501 | 1.170 | 2.089 |
| k_Bacteria;p_Chloroflexi;c_Anaerolineae;o_A31;f_S47;g_;s                                                                | 384 | 46 | 5.837<br>E-02 | 1.761 | 1.216 | 2.730 |
| k_Bacteria;p_Actinobacteria;c_Actinobacteria;o_Actinomycetales;f_Micrococcaceae;g_Kocuria;s                             | 349 | 47 | 5.837<br>E-02 | 2.655 | 1.450 | 6.058 |
| k_Bacteria;p_Firmicutes;c_Bacilli;o_Bacillales;f_Bacillaceae;g_;s                                                       | 402 | 48 | 5.837<br>E-02 | 1.459 | 1.148 | 1.981 |
| k_Bacteria;p_SR1;c_;o_;f_;g_;s                                                                                          | 247 | 49 | 6.181<br>E-02 | 1.430 | 1.116 | 1.862 |
| k_Bacteria;p_Actinobacteria;c_Actinobacteria;o_Actinomycetales;f_Mycobacteriaceae;g_Mycobacterium;s_arupense            | 519 | 50 | 6.181<br>E-02 | 2.526 | 1.406 | 5.334 |
| k_Bacteria;p_Spirochaetes;c_Spirochaetes;o_Spirochaetales;f_Spirochaetaceae;g_Treponema;s_socranskii                    | 549 | 51 | 6.181<br>E-02 | 1.622 | 1.195 | 2.451 |
| k_Bacteria;p_Proteobacteria;c_Betaproteobacteria;o_Burkholderiales;f_Comamonadaceae;g_Hydrogenophaga;s                  | 147 | 52 | 6.340<br>E-02 | 0.678 | 0.495 | 0.868 |
| k_Bacteria;p_Bacteroidetes;c_Sphingobacteriia;o_Sphingobacteriales;f_Sphingobacteriaceae;g_Sphingobacterium;s           | 20  | 53 | 6.436<br>E-02 | 0.630 | 0.420 | 0.837 |
| k_Bacteria;p_Proteobacteria;c_Alphaproteobacteria;o_Sphingomonadales;f_Sphingomonadaceae;g_;s                           | 35  | 54 | 6.436<br>E-02 | 0.845 | 0.745 | 0.950 |
| k_Bacteria;p_Firmicutes;c_Clostridia;o_Clostridiales;f_[Tissierellaceae];g_Gallicola;s                                  | 181 | 55 | 6.436<br>E-02 | 1.280 | 1.078 | 1.548 |
| k_Bacteria;p_Actinobacteria;c_Actinobacteria;o_Actinomycetales;f_Propionibacteriaceae;g_Microlunatus;s                  | 262 | 56 | 6.436<br>E-02 | 0.589 | 0.384 | 0.835 |
| k_Bacteria;p_Proteobacteria;c_Alphaproteobacteria;o_Rhodospirillales;f_;g_;s                                            | 101 | 57 | 6.788<br>E-02 | 1.351 | 1.089 | 1.695 |
| k_Bacteria;p_Firmicutes;c_Clostridia;o_Clostridiales;f_Veillonellaceae;g_Phascalartobacterium;s                         | 257 | 58 | 7.066<br>E-02 | 0.379 | 0.159 | 0.679 |
| k_Bacteria;p_Actinobacteria;c_Actinobacteria;o_Actinomycetales;f_Micrococcaceae;g_Kocuria;s_palustris                   | 537 | 59 | 7.110<br>E-02 | 2.285 | 1.304 | 4.584 |
| k_Bacteria;p_Actinobacteria;c_Actinobacteria;o_Actinomycetales;f_Micrococcaceae;g_Microbispora;s_rosea                  | 544 | 60 | 7.110<br>E-02 | 1.394 | 1.112 | 1.842 |

|                                                                                                                             |     |    |               |       |       |       |
|-----------------------------------------------------------------------------------------------------------------------------|-----|----|---------------|-------|-------|-------|
| k__Bacteria;p__Actinobacteria;c__Coriobacteriia;o__Coriobacteriales;f__Coriobacteriaceae;g__Slackia;s__                     | 356 | 61 | 7.137<br>E-02 | 1.885 | 1.298 | 3.609 |
| k__Bacteria;p__Bacteroidetes;c__Bacteroidia;o__Bacteroidales;f__Prevotellaceae;g__Prevotella;s__copri                       | 243 | 62 | 7.287<br>E-02 | 0.665 | 0.473 | 0.875 |
| k__Bacteria;p__Proteobacteria;c__Gammaproteobacteria;o__Pseudomonadales;f__Moraxellaceae;g__Acinetobacter;s__               | 208 | 63 | 8.260<br>E-02 | 0.841 | 0.737 | 0.958 |
| k__Bacteria;p__Planctomycetes;c__Planctomycetia;o__Gemmatales;f__Gemmataceae;g__s__                                         | 446 | 64 | 8.548<br>E-02 | 1.469 | 1.117 | 2.027 |
| k__Bacteria;p__Proteobacteria;c__Betaproteobacteria;o__Burkholderiales;f__Comamonadaceae;g__Limnochabitans;s__              | 135 | 65 | 1.003<br>E-01 | 0.759 | 0.602 | 0.929 |
| k__Bacteria;p__Actinobacteria;c__Actinobacteria;o__Actinomycetales;f__Corynebacteriaceae;g__Corynebacterium;s__durum        | 183 | 66 | 1.015<br>E-01 | 1.170 | 1.035 | 1.325 |
| k__Bacteria;p__Bacteroidetes;c__Bacteroidia;o__Bacteroidales;f__Prevotellaceae;g__Prevotella;s__nanceiensis                 | 174 | 67 | 1.029<br>E-01 | 1.256 | 1.050 | 1.505 |
| k__Bacteria;p__Bacteroidetes;c__Bacteroidia;o__Bacteroidales;f__Prevotellaceae;g__Prevotella;s__intermedia                  | 171 | 68 | 1.029<br>E-01 | 1.310 | 1.068 | 1.650 |
| k__Bacteria;p__Firmicutes;c__Clostridia;o__Clostridiales;f__Eubacteriaceae;g__Pseudoramibacter_Eubacterium;s__              | 422 | 69 | 1.034<br>E-01 | 1.366 | 1.084 | 1.803 |
| k__Bacteria;p__Actinobacteria;c__Actinobacteria;o__Actinomycetales;f__Nocardioideaceae;g__Propionicimonas;s__               | 334 | 70 | 1.140<br>E-01 | 0.615 | 0.398 | 0.872 |
| k__Bacteria;p__Proteobacteria;c__Betaproteobacteria;o__Burkholderiales;f__Burkholderiaceae;g__Burkholderia;s__              | 198 | 71 | 1.143<br>E-01 | 1.164 | 1.031 | 1.318 |
| k__Bacteria;p__Proteobacteria;c__Gammaproteobacteria;o__Enterobacteriales;f__Enterobacteriaceae;g__s__                      | 297 | 72 | 1.172<br>E-01 | 1.135 | 1.026 | 1.260 |
| k__Bacteria;p__Proteobacteria;c__Betaproteobacteria;o__ASSO-13;f__g__s__                                                    | 462 | 73 | 1.197<br>E-01 | 0.542 | 0.303 | 0.837 |
| k__Bacteria;p__Firmicutes;c__Clostridia;o__Clostridiales;f__Tissierellaceae;g__Helcococcus;s__                              | 418 | 74 | 1.197<br>E-01 | 1.732 | 1.150 | 2.873 |
| k__Bacteria;p__Actinobacteria;c__Actinobacteria;o__Actinomycetales;f__Nocardiaceae;g__Rhodococcus;s__fascians               | 275 | 75 | 1.201<br>E-01 | 0.476 | 0.238 | 0.820 |
| k__Bacteria;p__Firmicutes;c__Clostridia;o__Clostridiales;f__Lachnospiraceae;g__[Ruminococcus];s__                           | 190 | 76 | 1.201<br>E-01 | 0.720 | 0.539 | 0.928 |
| k__Bacteria;p__Actinobacteria;c__Thermoleophilia;o__Solirubrobacterales;f__Solirubrobacteraceae;g__s__                      | 180 | 77 | 1.213<br>E-01 | 0.456 | 0.191 | 0.763 |
| k__Bacteria;p__Acidobacteria;c__[Chloracidobacteria];o__DS-100;f__g__s__                                                    | 337 | 78 | 1.216<br>E-01 | 1.249 | 1.042 | 1.508 |
| k__Bacteria;p__Proteobacteria;c__Alphaproteobacteria;o__Rhizobiales;f__Rhizobiaceae;g__Agrobacterium;s__                    | 81  | 79 | 1.216<br>E-01 | 0.875 | 0.780 | 0.974 |
| k__Bacteria;p__Proteobacteria;c__Alphaproteobacteria;o__Sphingomonadales;f__Sphingomonadaceae;g__Sphingomonas;s__echinoides | 129 | 80 | 1.216<br>E-01 | 0.878 | 0.786 | 0.975 |
| k__Bacteria;p__Actinobacteria;c__Actinobacteria;o__Bifidobacteriales;f__Bifidobacteriaceae;g__Bifidobacterium;s__longum     | 36  | 81 | 1.216<br>E-01 | 0.804 | 0.661 | 0.952 |
| k__Bacteria;p__Proteobacteria;c__Alphaproteobacteria;o__Rickettsiales;f__Rickettsiaceae;g__s__                              | 459 | 82 | 1.216<br>E-01 | 0.632 | 0.410 | 0.891 |
| k__Bacteria;p__Proteobacteria;c__Gammaproteobacteria;o__Pseudomonadales;f__Moraxellaceae;g__Psychrobacter;s__               | 327 | 83 | 1.216<br>E-01 | 0.629 | 0.403 | 0.887 |
| k__Bacteria;p__[Thermi];c__Deinococci;o__Thermales;f__Thermaceae;g__Thermus;s__                                             | 313 | 84 | 1.278<br>E-01 | 0.870 | 0.772 | 0.976 |
| k__Bacteria;p__Firmicutes;c__Bacilli;o__Lactobacillales;f__Carnobacteriaceae;g__Carnobacterium;s__                          | 125 | 85 | 1.356<br>E-01 | 0.761 | 0.592 | 0.945 |
| k__Bacteria;p__Proteobacteria;c__Alphaproteobacteria;o__Sphingomonadales;f__Sphingomonadaceae;g__Sphingopyxis;s__           | 71  | 86 | 1.356<br>E-01 | 1.253 | 1.037 | 1.529 |
| k__Bacteria;p__Firmicutes;c__Bacilli;o__Lactobacillales;f__Streptococcaceae;g__Streptococcus;s__anginosus                   | 114 | 87 | 1.396<br>E-01 | 1.143 | 1.019 | 1.283 |
| k__Bacteria;p__Actinobacteria;c__Actinobacteria;o__Actinomycetales;f__Yaniellaceae;g__Yaniella;s__                          | 215 | 88 | 1.485<br>E-01 | 1.529 | 1.071 | 2.278 |
| k__Bacteria;p__Cyanobacteria;c__Oscillatoriothrixaceae;o__Chroococcales;f__Xenococcaceae;g__s__                             | 293 | 89 | 1.508<br>E-01 | 1.159 | 1.019 | 1.320 |
| k__Bacteria;p__Firmicutes;c__Clostridia;o__Clostridiales;f__Veillonellaceae;g__Megamonas;s__                                | 137 | 90 | 1.515<br>E-01 | 0.581 | 0.284 | 0.831 |
| k__Bacteria;p__Actinobacteria;c__Rubrobacteria;o__Rubrobacterales;f__Rubrobacteraceae;g__Rubrobacter;s__                    | 358 | 91 | 1.515<br>E-01 | 1.325 | 1.038 | 1.710 |

|                                                                                                                      |     |     |               |       |       |        |
|----------------------------------------------------------------------------------------------------------------------|-----|-----|---------------|-------|-------|--------|
| k_Bacteria;p_Proteobacteria;c_Betaproteobacteria;o_Burkholderiales;f_Comamonadaceae;g_Delftia;s__                    | 170 | 92  | 1.515<br>E-01 | 1.121 | 1.016 | 1.242  |
| k_Bacteria;p_Proteobacteria;c_Alphaproteobacteria;o_Rhizobiales;f_g_s__                                              | 2   | 93  | 1.558<br>E-01 | 1.113 | 1.013 | 1.224  |
| k_Bacteria;p_Firmicutes;c_Clostridia;o_Clostridiales;f_Lachnospiraceae;g_[Ruminococcus];s_gnavus                     | 217 | 94  | 1.580<br>E-01 | 1.427 | 1.078 | 2.069  |
| k_Bacteria;p_Proteobacteria;c_Betaproteobacteria;o_Nitrosomonadales;f_Nitrosomonadaceae;g_s__                        | 469 | 95  | 1.598<br>E-01 | 1.501 | 1.074 | 2.268  |
| k_Bacteria;p_Proteobacteria;c_Gammaproteobacteria;o_Pseudomonadales;f_Pseudomonadaceae;g_Pseudomonas;s_viridiflava   | 220 | 96  | 1.617<br>E-01 | 0.889 | 0.798 | 0.985  |
| k_Bacteria;p_Firmicutes;c_Bacilli;o_Lactobacillales;f_Lactobacillaceae;g_Lactobacillus;s__                           | 302 | 97  | 1.617<br>E-01 | 1.125 | 1.013 | 1.251  |
| k_Bacteria;p_Firmicutes;c_Bacilli;o_Lactobacillales;f_Leuconostocaceae;g_Leuconostoc;s_mesenteroides                 | 532 | 98  | 1.686<br>E-01 | 1.491 | 1.087 | 2.336  |
| k_Bacteria;p_Proteobacteria;c_Alphaproteobacteria;o_Sphingomonadales;f_Sphingomonadaceae;g_Kaistobacter;s__          | 113 | 99  | 1.722<br>E-01 | 0.864 | 0.754 | 0.983  |
| k_Bacteria;p_Firmicutes;c_Bacilli;o_Bacillales;f_g_s__                                                               | 58  | 100 | 1.796<br>E-01 | 0.845 | 0.718 | 0.980  |
| k_Bacteria;p_Kazan-3B-28;c_o_f_g_s__                                                                                 | 436 | 101 | 1.796<br>E-01 | 0.744 | 0.545 | 0.951  |
| k_Bacteria;p_Proteobacteria;c_Betaproteobacteria;o_Neisseriales;f_Neisseriaceae;g_Neisseria;s_subflava               | 228 | 102 | 1.894<br>E-01 | 1.367 | 1.026 | 1.857  |
| k_Bacteria;p_TM7;c_TM7-3;o_EW055;f_g_s__                                                                             | 134 | 103 | 1.894<br>E-01 | 0.844 | 0.712 | 0.980  |
| k_Bacteria;p_Firmicutes;c_Clostridia;o_Clostridiales;f_Lachnospiraceae;g_Dorea;s__                                   | 309 | 104 | 1.911<br>E-01 | 1.338 | 1.022 | 1.775  |
| k_Bacteria;p_Firmicutes;c_Clostridia;o_Clostridiales;f_Veillonellaceae;g_Veillonella;s__                             | 277 | 105 | 1.981<br>E-01 | 1.194 | 1.010 | 1.415  |
| k_Bacteria;p_Actinobacteria;c_Actinobacteria;o_Actinomycetales;f_Actinomycetaceae;g_Actinomyces;s_europaeus          | 527 | 106 | 1.981<br>E-01 | 1.330 | 1.025 | 1.784  |
| k_Bacteria;p_Actinobacteria;c_Thermoleophilia;o_Gaiellales;f_Gaiellaceae;g_s__                                       | 361 | 107 | 2.070<br>E-01 | 1.550 | 1.065 | 2.613  |
| k_Bacteria;p_Actinobacteria;c_Thermoleophilia;o_Gaiellales;f_AK1AB1_02E;g_s__                                        | 360 | 108 | 2.070<br>E-01 | 1.417 | 1.021 | 2.017  |
| k_Bacteria;p_Firmicutes;c_Bacilli;o_Bacillales;f_Staphylococcaceae;g_Staphylococcus;s__                              | 202 | 109 | 2.105<br>E-01 | 0.884 | 0.784 | 0.995  |
| k_Bacteria;p_Proteobacteria;c_Gammaproteobacteria;o_Pasteurellales;f_Pasteurellaceae;g_Aggregatibacter;s__           | 196 | 110 | 2.110<br>E-01 | 1.186 | 1.005 | 1.399  |
| k_Bacteria;p_Actinobacteria;c_Actinobacteria;o_Actinomycetales;f_Micrococcaceae;g_Nesterenkonia;s__                  | 350 | 111 | 2.145<br>E-01 | 1.244 | 1.010 | 1.557  |
| k_Bacteria;p_Proteobacteria;c_Betaproteobacteria;o_Rhodocyclales;f_Rhodocyclaceae;g_Zoogloea;s__                     | 128 | 112 | 2.158<br>E-01 | 1.288 | 1.009 | 1.664  |
| k_Bacteria;p_Proteobacteria;c_Betaproteobacteria;o_Ellin6067;f_g_s__                                                 | 466 | 113 | 2.158<br>E-01 | 3.223 | 1.340 | 12.749 |
| k_Bacteria;p_Actinobacteria;c_Actinobacteria;o_Actinomycetales;f_Micrococcaceae;g_Micrococcus;s_luteus               | 169 | 114 | 2.220<br>E-01 | 1.277 | 1.004 | 1.630  |
| k_Bacteria;p_Proteobacteria;c_Gammaproteobacteria;o_Enterobacteriales;f_Enterobacteriaceae;g_Erwinia;s__             | 321 | 115 | 2.244<br>E-01 | 0.779 | 0.599 | 0.984  |
| k_Bacteria;p_Proteobacteria;c_Alphaproteobacteria;o_Caulobacterales;f_Caulobacteraceae;g_Phenylobacterium;s__        | 310 | 116 | 2.251<br>E-01 | 0.556 | 0.270 | 0.905  |
| k_Bacteria;p_Firmicutes;c_Bacilli;o_Lactobacillales;f_Lactobacillaceae;g_Lactobacillus;s_zeae                        | 158 | 117 | 2.258<br>E-01 | 1.390 | 1.022 | 2.018  |
| k_Bacteria;p_Firmicutes;c_Bacilli;o_Bacillales;f_Planococcaceae;g_s__                                                | 221 | 118 | 2.258<br>E-01 | 0.893 | 0.798 | 0.999  |
| k_Bacteria;p_Actinobacteria;c_Actinobacteria;o_Actinomycetales;f_Dermabacteraceae;g_Brachy bacterium;s_conglomeratum | 265 | 119 | 2.293<br>E-01 | 0.833 | 0.687 | 0.993  |
| k_Bacteria;p_Firmicutes;c_Clostridia;o_Clostridiales;f_[Mogibacteriaceae];g_s__                                      | 205 | 120 | 2.293<br>E-01 | 1.222 | 1.001 | 1.502  |
| k_Bacteria;p_Bacteroidetes;c_Bacteroidia;o_Bacteroidales;f_Porphyrimonadaceae;g_Dysgonomonas;s__                     | 368 | 121 | 2.322<br>E-01 | 1.912 | 1.076 | 4.045  |
| k_Bacteria;p_Actinobacteria;c_Actinobacteria;o_Actinomycetales;f_Microbacteriaceae;g_Microbacterium;s__              | 23  | 122 | 2.322<br>E-01 | 0.910 | 0.825 | 0.999  |

|                                                                                                                                |     |     |               |       |       |       |
|--------------------------------------------------------------------------------------------------------------------------------|-----|-----|---------------|-------|-------|-------|
| k_Bacteria;p_Actinobacteria;c_Actinobacteria;o_Actinomycetales;f_Dietziaceae;g_s                                               | 305 | 123 | 2.322<br>E-01 | 0.595 | 0.295 | 0.903 |
| k_Bacteria;p_Chloroflexi;c_o;f_g;s                                                                                             | 383 | 124 | 2.322<br>E-01 | 1.402 | 0.997 | 1.988 |
| k_Bacteria;p_Firmicutes;c_Bacilli;o_Lactobacillales;f_Leuconostocaceae;g_Leuconostoc;s                                         | 414 | 125 | 2.334<br>E-01 | 0.286 | 0.047 | 0.715 |
| k_Bacteria;p_Proteobacteria;c_Alphaproteobacteria;o_Sphingomonadales;f_Sphingomonadaceae;g_Zymomonas;s                         | 460 | 126 | 2.350<br>E-01 | 1.427 | 0.997 | 2.090 |
| k_Bacteria;p_Proteobacteria;c_Betaproteobacteria;o_Burkholderiales;f_Comamonadaceae;g_Comamonas;s                              | 216 | 127 | 2.350<br>E-01 | 0.808 | 0.638 | 0.991 |
| k_Bacteria;p_Actinobacteria;c_Actinobacteria;o_Actinomycetales;f_Dermabacteraceae;g_Dermabacter;s                              | 244 | 128 | 2.350<br>E-01 | 0.828 | 0.676 | 0.996 |
| k_Bacteria;p_Firmicutes;c_Erysipelotrichi;o_Erysipelotrichales;f_Erysipelotrichaceae;g_[Eubacterium];s_biforme                 | 319 | 129 | 2.390<br>E-01 | 0.437 | 0.146 | 0.886 |
| k_Bacteria;p_Proteobacteria;c_Alphaproteobacteria;o_Sphingomonadales;f_Sphingomonadaceae;g_Sphingomonas;s                      | 57  | 130 | 2.390<br>E-01 | 0.920 | 0.844 | 1.001 |
| k_Bacteria;p_Proteobacteria;c_Betaproteobacteria;o_Burkholderiales;f_Comamonadaceae;g_Acidovorax;s                             | 199 | 131 | 2.459<br>E-01 | 1.308 | 0.997 | 1.766 |
| k_Bacteria;p_Firmicutes;c_Bacilli;o_Bacillales;f_Staphylococcaceae;g_Staphylococcus;s_epidermidis                              | 214 | 132 | 2.532<br>E-01 | 0.870 | 0.751 | 1.005 |
| k_Bacteria;p_Actinobacteria;c_Actinobacteria;o_Actinomycetales;f_Microbacteriaceae;g_Rathayibacter;s_caricis                   | 192 | 133 | 2.633<br>E-01 | 0.841 | 0.688 | 0.997 |
| k_Bacteria;p_Proteobacteria;c_Gammaproteobacteria;o_Xanthomonadales;f_Xanthomonadaceae;g_Stenotrophomonas;s                    | 55  | 134 | 2.663<br>E-01 | 0.825 | 0.670 | 1.010 |
| k_Bacteria;p_Proteobacteria;c_Gammaproteobacteria;o_Pseudomonadales;f_Moraxellaceae;g_Psychrobacter;s_sanguinis                | 308 | 135 | 2.663<br>E-01 | 0.604 | 0.313 | 0.958 |
| k_Bacteria;p_Actinobacteria;c_Actinobacteria;o_Actinomycetales;f_Actinomycetaceae;g_Actinobaculum;s                            | 324 | 136 | 2.668<br>E-01 | 1.285 | 0.987 | 1.703 |
| k_Bacteria;p_Bacteroidetes;c_Flavobacteriia;o_Flavobacteriales;f_[Weeksellaceae];g_Elizabethkingia;s_meningoseptica            | 154 | 137 | 2.703<br>E-01 | 0.833 | 0.675 | 1.002 |
| k_Bacteria;p_Firmicutes;c_Clostridia;o_Clostridiales;f_[Mogibacteriaceae];g_Mogibacterium;s                                    | 271 | 138 | 2.703<br>E-01 | 1.427 | 0.975 | 2.120 |
| k_Bacteria;p_Bacteroidetes;c_Bacteroidia;o_Bacteroidales;f_Porphyromonadaceae;g_Porphyromonas;s_endodontalis                   | 526 | 139 | 2.726<br>E-01 | 1.508 | 0.979 | 2.430 |
| k_Bacteria;p_Firmicutes;c_Bacilli;o_Gemellales;f_g;s                                                                           | 407 | 140 | 2.732<br>E-01 | 0.468 | 0.167 | 0.923 |
| k_Bacteria;p_Bacteroidetes;c_Flavobacteriia;o_Flavobacteriales;f_[Weeksellaceae];g_s                                           | 148 | 141 | 2.745<br>E-01 | 1.183 | 0.986 | 1.425 |
| k_Bacteria;p_Acidobacteria;c_Acidobacteria-6;o_CCU21;f_g;s                                                                     | 339 | 142 | 2.755<br>E-01 | 1.549 | 0.989 | 2.671 |
| k_Bacteria;p_Proteobacteria;c_Gammaproteobacteria;o_Cardiobacteriales;f_Cardiobacteriaceae;g_Cardiobacterium;s                 | 241 | 143 | 2.780<br>E-01 | 0.426 | 0.106 | 0.852 |
| k_Bacteria;p_Actinobacteria;c_Actinobacteria;o_Actinomycetales;f_Microbacteriaceae;g_s                                         | 9   | 144 | 2.904<br>E-01 | 0.925 | 0.846 | 1.005 |
| k_Bacteria;p_Bacteroidetes;c_Bacteroidia;o_Bacteroidales;f_[Paraprevotellaceae];g_[Prevotella];s_tannerae                      | 259 | 145 | 2.909<br>E-01 | 1.193 | 0.981 | 1.458 |
| k_Bacteria;p_Proteobacteria;c_Gammaproteobacteria;o_Pseudomonadales;f_Pseudomonadaceae;g_s                                     | 83  | 146 | 2.981<br>E-01 | 0.832 | 0.676 | 1.020 |
| k_Bacteria;p_Proteobacteria;c_Deltaproteobacteria;o_Syntrophobacterales;f_Syntrophobacteraceae;g_s                             | 175 | 147 | 2.986<br>E-01 | 1.332 | 0.969 | 1.863 |
| k_Bacteria;p_Bacteroidetes;c_Bacteroidia;o_Bacteroidales;f_Prevotellaceae;g_Prevotella;s_nigrescens                            | 295 | 148 | 3.009<br>E-01 | 1.194 | 0.977 | 1.461 |
| k_Bacteria;p_Proteobacteria;c_Betaproteobacteria;o_Burkholderiales;f_Alcaligenaceae;g_Achromobacter;s                          | 287 | 149 | 3.070<br>E-01 | 0.910 | 0.817 | 1.012 |
| k_Bacteria;p_Proteobacteria;c_Gammaproteobacteria;o_Pseudomonadales;f_Pseudomonadaceae;g_Pseudomonas;s_fragi                   | 157 | 150 | 3.070<br>E-01 | 1.093 | 0.989 | 1.209 |
| k_Bacteria;p_Chloroflexi;c_Thermomicrobia;o_JG30-KF-CM45;f_g;s                                                                 | 3   | 151 | 3.141<br>E-01 | 1.081 | 0.988 | 1.182 |
| k_Bacteria;p_Proteobacteria;c_Alphaproteobacteria;o_Rhizobiales;f_Hyphomicrobiaceae;g_s                                        | 236 | 152 | 3.168<br>E-01 | 1.261 | 0.964 | 1.652 |
| k_Bacteria;p_Verrucomicrobia;c_[Spartobacteria];o_[Chthoniobacterales];f_[Chthoniobacteraceae];g_CandidatusXiphinematobacter;s | 151 | 153 | 3.168<br>E-01 | 0.868 | 0.726 | 1.011 |

|                                                                                                                        |     |     |               |       |       |       |
|------------------------------------------------------------------------------------------------------------------------|-----|-----|---------------|-------|-------|-------|
| k_Bacteria;p_Proteobacteria;c_Gammaproteobacteria;o_Enterobacteriales;f_Enterobacteriaceae;g_Klebsiella;s__            | 242 | 154 | 3.186<br>E-01 | 0.665 | 0.352 | 0.970 |
| k_Bacteria;p_Actinobacteria;c_Coriobacteriia;o_Coriobacteriales;f_Coriobacteriaceae;g_Collinsella;s_aerofaciens        | 296 | 155 | 3.198<br>E-01 | 0.843 | 0.683 | 1.018 |
| k_Bacteria;p_Proteobacteria;c_Epsilonproteobacteria;o_Campylobacteriales;f_Campylobacteraceae;g_Campylobacter;s__      | 323 | 156 | 3.296<br>E-01 | 0.916 | 0.826 | 1.013 |
| k_Bacteria;p_[Thermi];c_Deinococci;o_Deinococcales;f_Deinococcaceae;g_Deinococcus;s__                                  | 22  | 157 | 3.296<br>E-01 | 1.073 | 0.988 | 1.165 |
| k_Bacteria;p_WPS-2;c__;o__;f__;g__;s__                                                                                 | 240 | 158 | 3.296<br>E-01 | 0.799 | 0.594 | 1.017 |
| k_Bacteria;p_Bacteroidetes;c_Cytophagia;o_Cytophagales;f_Cytophagaceae;g__;s__                                         | 371 | 159 | 3.296<br>E-01 | 1.264 | 0.959 | 1.680 |
| k_Bacteria;p_Verrucomicrobia;c_Verrucomicrobiae;o_Verrucomicrobiales;f_Verrucomicrobiaceae;g_Akkermansia;s_muciniphila | 534 | 160 | 3.296<br>E-01 | 0.572 | 0.279 | 1.060 |
| k_Bacteria;p_Synergistetes;c_Synergistia;o_Synergistales;f_Dethiosulfovibrionaceae;g_TG5;s__                           | 62  | 161 | 3.296<br>E-01 | 1.182 | 0.971 | 1.452 |
| k_Bacteria;p_Proteobacteria;c_Gammaproteobacteria;o_Thiotrichales;f_Thiotrichaceae;g_Thiothrix;s__                     | 506 | 162 | 3.394<br>E-01 | 0.815 | 0.625 | 1.024 |
| k_Bacteria;p_Bacteroidetes;c_Bacteroidia;o_Bacteroidales;f_Prevotellaceae;g_Prevotella;s_melaninogenica                | 82  | 163 | 3.425<br>E-01 | 1.073 | 0.986 | 1.167 |
| k_Bacteria;p_Chloroflexi;c_Anaerolineae;o_Caldilineales;f_Caldilineaceae;g__;s__                                       | 386 | 164 | 3.436<br>E-01 | 1.254 | 0.954 | 1.645 |
| k_Bacteria;p_Proteobacteria;c_Gammaproteobacteria;o_Pseudomonadales;f_Moraxellaceae;g__;s__                            | 52  | 165 | 3.441<br>E-01 | 1.072 | 0.986 | 1.166 |
| k_Bacteria;p_Actinobacteria;c_Actinobacteria;o_Actinomycetales;f_Sanguibacteraceae;g_Sanguibacter;s__                  | 224 | 166 | 3.454<br>E-01 | 0.810 | 0.616 | 1.030 |
| k_Bacteria;p_Proteobacteria;c_Alphaproteobacteria;o_Rickettsiales;f_mitochondria;g__;s__                               | 458 | 167 | 3.454<br>E-01 | 0.658 | 0.354 | 1.007 |
| k_Bacteria;p_Actinobacteria;c_Actinobacteria;o_Actinomycetales;f_Microbacteriaceae;g_Agrococcus;s_jenensis             | 530 | 168 | 3.486<br>E-01 | 0.335 | 0.045 | 0.851 |
| k_Bacteria;p_Proteobacteria;c_Betaproteobacteria;o_Burkholderiales;f_Oxalobacteraceae;g__;s__                          | 7   | 169 | 3.489<br>E-01 | 1.071 | 0.986 | 1.165 |
| k_Bacteria;p_Proteobacteria;c_Gammaproteobacteria;o_Pseudomonadales;f_Moraxellaceae;g_Acinetobacter;s_rhizosphaerae    | 543 | 170 | 3.517<br>E-01 | 0.785 | 0.564 | 1.031 |
| k_Bacteria;p_TM6;c_SJA-4;o_S1198;f__;g__;s__                                                                           | 510 | 171 | 3.517<br>E-01 | 1.380 | 0.946 | 2.142 |
| k_Bacteria;p_Proteobacteria;c_Alphaproteobacteria;o_Rhizobiales;f_Rhizobiaceae;g_Rhizobium;s_leguminosarum             | 531 | 172 | 3.582<br>E-01 | 0.606 | 0.253 | 0.963 |
| k_Bacteria;p_Proteobacteria;c_Gammaproteobacteria;o_Enterobacteriales;f_Enterobacteriaceae;g_Serratia;s_marcescens     | 204 | 173 | 3.694<br>E-01 | 0.676 | 0.366 | 1.000 |
| k_Bacteria;p_Bacteroidetes;c_Sphingobacteriia;o_Sphingobacteriales;f_Sphingobacteriaceae;g__;s__                       | 90  | 174 | 3.704<br>E-01 | 0.894 | 0.771 | 1.023 |
| k_Bacteria;p_Actinobacteria;c_Actinobacteria;o_Actinomycetales;f_Micrococcaceae;g_Kocuria;s_rhizophila                 | 322 | 175 | 3.752<br>E-01 | 1.077 | 0.981 | 1.182 |
| k_Bacteria;p_Acidobacteria;c_Acidobacteria-6;o_iii1-15;f_mb2424;g__;s__                                                | 340 | 176 | 3.752<br>E-01 | 1.241 | 0.944 | 1.638 |
| k_Bacteria;p_Chloroflexi;c_TK10;o_AKYG885;f_Dolo_23;g__;s__                                                            | 392 | 177 | 3.752<br>E-01 | 1.287 | 0.933 | 1.778 |
| k_Bacteria;p_Proteobacteria;c_Betaproteobacteria;o_Burkholderiales;f_Burkholderiaceae;g__;s__                          | 464 | 178 | 3.855<br>E-01 | 0.826 | 0.633 | 1.038 |
| k_Bacteria;p_Proteobacteria;c_Alphaproteobacteria;o_Rhizobiales;f_Methylobacteriaceae;g_Methylobacterium;s__           | 261 | 179 | 3.855<br>E-01 | 0.904 | 0.792 | 1.026 |
| k_Bacteria;p_Cyanobacteria;c_Oscillatoriophyceidae;o_Chroococcales;f__;g__;s__                                         | 397 | 180 | 3.858<br>E-01 | 1.245 | 0.938 | 1.664 |
| k_Bacteria;p_Proteobacteria;c_Gammaproteobacteria;o_Legionellales;f__;g__;s__                                          | 498 | 181 | 3.858<br>E-01 | 0.895 | 0.771 | 1.026 |
| k_Bacteria;p_Cyanobacteria;c_Chloroplast;o_Chlorophyta;f_Trebouxiophyceae;g__;s__                                      | 61  | 182 | 3.858<br>E-01 | 0.934 | 0.849 | 1.015 |
| k_Bacteria;p_Proteobacteria;c_Gammaproteobacteria;o_Pasteurellales;f_Pasteurellaceae;g_Haemophilus;s_painfluenzae      | 188 | 183 | 3.858<br>E-01 | 0.919 | 0.820 | 1.021 |
| k_Bacteria;p_Firmicutes;c_Bacilli;o_Bacillales;f_[Exiguobacteraceae];g_Exiguobacterium;s__                             | 15  | 184 | 3.858<br>E-01 | 1.085 | 0.976 | 1.205 |

|                                                                                                                 |     |     |               |       |       |       |
|-----------------------------------------------------------------------------------------------------------------|-----|-----|---------------|-------|-------|-------|
| k_Bacteria;p_Firmicutes;c_Bacilli;o_Lactobacillales;f_Lactobacillaceae;g_Lactobacillus;s_reuteri                | 264 | 185 | 3.858<br>E-01 | 1.149 | 0.959 | 1.381 |
| k_Bacteria;p_Proteobacteria;c_Alphaproteobacteria;o_Rhizobiales;f_Hyphomicrobiaceae;g_Devosia;s__               | 286 | 186 | 3.858<br>E-01 | 0.904 | 0.790 | 1.027 |
| k_Bacteria;p_Actinobacteria;c_Actinobacteria;o_Actinomycetales;f_Microbacteriaceae;g_Salinibacterium;s__        | 108 | 187 | 3.858<br>E-01 | 0.926 | 0.834 | 1.019 |
| k_Bacteria;p_Proteobacteria;c_Betaproteobacteria;o_Burkholderiales;f_Comamonadaceae;g_Tepidimonas;s__           | 159 | 188 | 3.858<br>E-01 | 0.860 | 0.699 | 1.037 |
| k_Bacteria;p_Proteobacteria;c_Betaproteobacteria;o_Burkholderiales;f_Oxalobacteraceae;g_Cupriavidus;s__         | 294 | 189 | 3.879<br>E-01 | 0.852 | 0.682 | 1.040 |
| k_Bacteria;p_Actinobacteria;c_Coriobacteriia;o_Coriobacteriales;f_Coriobacteriaceae;g__;s__                     | 96  | 190 | 4.046<br>E-01 | 1.097 | 0.969 | 1.239 |
| k_Bacteria;p_Proteobacteria;c_Alphaproteobacteria;o_Rhizobiales;f_Beijerinckiaceae;g__;s__                      | 42  | 191 | 4.226<br>E-01 | 0.912 | 0.800 | 1.028 |
| k_Bacteria;p_Proteobacteria;c_Betaproteobacteria;o_Neisseriales;f_Neisseriaceae;g_Neisseria;s__                 | 138 | 192 | 4.235<br>E-01 | 1.066 | 0.977 | 1.163 |
| k_Bacteria;p_Cyanobacteria;c_4C0d-2;o_MLE1-12;f__;g__;s__                                                       | 218 | 193 | 4.421<br>E-01 | 1.067 | 0.976 | 1.166 |
| k_Bacteria;p_Proteobacteria;c_Deltaproteobacteria;o_Spirochetales;f__;g__;s__                                   | 483 | 194 | 4.421<br>E-01 | 0.921 | 0.816 | 1.025 |
| k_Bacteria;p_TM7;c_TM7-3;o_CW040;f_F16;g__;s__                                                                  | 281 | 195 | 4.421<br>E-01 | 1.185 | 0.935 | 1.511 |
| k_Bacteria;p_Bacteroidetes;c_Bacteroidia;o_Bacteroidales;f_Prevotellaceae;g_Prevotella;s__                      | 279 | 196 | 4.421<br>E-01 | 1.067 | 0.975 | 1.168 |
| k_Bacteria;p_TM7;c_TM7-3;o_CW040;f__;g__;s__                                                                    | 511 | 197 | 4.421<br>E-01 | 0.597 | 0.214 | 1.038 |
| k_Bacteria;p_OD1;c__;o__;f__;g__;s__                                                                            | 438 | 198 | 4.421<br>E-01 | 0.866 | 0.701 | 1.048 |
| k_Bacteria;p_Proteobacteria;c_Betaproteobacteria;o_Burkholderiales;f__;g__;s__                                  | 463 | 199 | 4.435<br>E-01 | 1.353 | 0.893 | 2.163 |
| k_Bacteria;p_Firmicutes;c_Clostridia;o_Clostridiales;f_Ruminococcaceae;g_Faecalibacterium;s_prausnitzii         | 107 | 200 | 4.451<br>E-01 | 1.112 | 0.956 | 1.291 |
| k_Bacteria;p_Firmicutes;c_Clostridia;o_Clostridiales;f_Lachnospiraceae;g_Coproccoccus;s__                       | 121 | 201 | 4.451<br>E-01 | 1.319 | 0.896 | 2.000 |
| k_Bacteria;p_Firmicutes;c_Clostridia;o_Clostridiales;f_Veillonellaceae;g_Dialister;s__                          | 156 | 202 | 4.457<br>E-01 | 0.927 | 0.830 | 1.029 |
| k_Bacteria;p_Proteobacteria;c_Betaproteobacteria;o_Rhodocyclales;f_Rhodocyclaceae;g__;s__                       | 63  | 203 | 4.457<br>E-01 | 0.869 | 0.705 | 1.051 |
| k_Bacteria;p_Actinobacteria;c_Actinobacteria;o_Actinomycetales;f_Corynebacteriaceae;g_Corynebacterium;s__       | 238 | 204 | 4.595<br>E-01 | 0.940 | 0.860 | 1.027 |
| k_Bacteria;p_Firmicutes;c_Clostridia;o_Clostridiales;f_Clostridiaceae;g_SMB53;s__                               | 11  | 205 | 4.595<br>E-01 | 1.072 | 0.969 | 1.185 |
| k_Bacteria;p_Proteobacteria;c_Epsilonproteobacteria;o_Campylobacteriales;f_Helicobacteraceae;g__;s__            | 487 | 206 | 4.595<br>E-01 | 1.240 | 0.907 | 1.699 |
| k_Bacteria;p_Proteobacteria;c_Betaproteobacteria;o_Methylophilales;f_Methylophilaceae;g_Methylotenera;s_mobilis | 533 | 207 | 4.595<br>E-01 | 1.134 | 0.944 | 1.360 |
| k_Bacteria;p_Chloroflexi;c_Anaerolineae;o_SHA-20;f__;g__;s__                                                    | 389 | 208 | 4.662<br>E-01 | 1.211 | 0.913 | 1.611 |
| k_Bacteria;p_Bacteroidetes;c_[Saprospirae];o_[Saprospirales];f_Saprospiraceae;g__;s__                           | 235 | 209 | 4.662<br>E-01 | 1.186 | 0.923 | 1.524 |
| k_Bacteria;p_Firmicutes;c_Bacilli;o_Bacillales;f_Bacillaceae;g_Geobacillus;s__                                  | 191 | 210 | 4.668<br>E-01 | 1.086 | 0.962 | 1.225 |
| k_Bacteria;p_Firmicutes;c_Clostridia;o_Clostridiales;f_Eubacteriaceae;g_Acetobacterium;s__                      | 421 | 211 | 4.676<br>E-01 | 1.282 | 0.887 | 1.847 |
| k_Bacteria;p_Proteobacteria;c_Alphaproteobacteria;o_Rhodospirillales;f_Rhodospirillaceae;g__;s__                | 64  | 212 | 4.714<br>E-01 | 1.080 | 0.964 | 1.208 |
| k_Bacteria;p_Actinobacteria;c_Actinobacteria;o_Actinomycetales;f_Nocardioidaceae;g_Friedmanniella;s__           | 144 | 213 | 4.714<br>E-01 | 0.789 | 0.540 | 1.095 |
| k_Bacteria;p_Proteobacteria;c_Alphaproteobacteria;o_Rhizobiales;f_Brucellaceae;g_Ochrobactrum;s__               | 450 | 214 | 4.714<br>E-01 | 0.677 | 0.342 | 1.122 |
| k_Bacteria;p_Actinobacteria;c_Actinobacteria;o_Actinomycetales;f_Geodermatophilaceae;g__;s__                    | 100 | 215 | 4.714<br>E-01 | 0.912 | 0.793 | 1.042 |



|                                                                                                                    |     |     |               |       |       |       |
|--------------------------------------------------------------------------------------------------------------------|-----|-----|---------------|-------|-------|-------|
| k_Bacteria;p_Chlamydiae;c_Chlamydia; o_Chlamydiales;f_Parachlamydiaceae;g__;s__                                    | 378 | 216 | 4.714<br>E-01 | 1.162 | 0.927 | 1.454 |
| k_Bacteria;p_Actinobacteria;c_Actinobacteria; o_Actinomycetales;f_Micrococcaceae;g_Rothia;s_mucilaginos            | 110 | 217 | 4.714<br>E-01 | 1.055 | 0.974 | 1.143 |
| k_Bacteria;p_Bacteroidetes;c_[Saprosirae]; o_[Saprosirales];f_Chitinophagaceae;g_Sediminibacterium;s__             | 223 | 218 | 4.734<br>E-01 | 0.936 | 0.848 | 1.032 |
| k_Bacteria;p_Proteobacteria;c_Betaproteobacteria; o_Neisseriales;f_Neisseriaceae;g_Neisseria;s_cinerea             | 523 | 219 | 4.791<br>E-01 | 1.210 | 0.907 | 1.631 |
| k_Bacteria;p_Acidobacteria;c_Sva0725; o_Sva0725;f__;g__;s__                                                        | 343 | 220 | 4.849<br>E-01 | 1.225 | 0.898 | 1.667 |
| k_Bacteria;p_Bacteroidetes;c_Bacteroidia; o_Bacteroidales;f_Porphyrimonadaceae;g_Parabacteroides;s_distasonis      | 525 | 221 | 4.853<br>E-01 | 0.607 | 0.210 | 1.097 |
| k_Bacteria;p_Firmicutes;c_Bacilli; o_Bacillales;f_Bacillaceae;g_Bacillus;s_flexus                                  | 330 | 222 | 4.880<br>E-01 | 0.800 | 0.534 | 1.079 |
| k_Bacteria;p_Proteobacteria;c_Gammaproteobacteria; o_Legionellales;f_Legionellaceae;g_Legionella;s__               | 502 | 223 | 5.019<br>E-01 | 1.140 | 0.929 | 1.397 |
| k_Bacteria;p_Proteobacteria;c_Gammaproteobacteria; o_Vibrionales;f_Pseudoalteromonadaceae;g_Pseudoalteromonas;s__  | 168 | 224 | 5.132<br>E-01 | 1.108 | 0.942 | 1.303 |
| k_Bacteria;p_Firmicutes;c_Bacilli; o_Bacillales;f_Bacillaceae;g_Anoxybacillus;s_kestanbolensis                     | 54  | 225 | 5.138<br>E-01 | 0.912 | 0.788 | 1.051 |
| k_Bacteria;p_Actinobacteria;c_Actinobacteria; o_Actinomycetales;f_Microbacteriaceae;g_Leucobacter;s__              | 176 | 226 | 5.138<br>E-01 | 0.905 | 0.768 | 1.051 |
| k_Bacteria;p_Chloroflexi;c_Ellin6529; o__;f__;g__;s__                                                              | 282 | 227 | 5.138<br>E-01 | 1.185 | 0.904 | 1.547 |
| k_Bacteria;p_Chlamydiae;c_Chlamydia; o_Chlamydiales;f_Parachlamydiaceae;g_Parachlamydia;s_acanthamoebae            | 516 | 228 | 5.138<br>E-01 | 1.176 | 0.907 | 1.523 |
| k_Bacteria;p_Cyanobacteria;c_4C0d-2; o_YS2;f__;g__;s__                                                             | 395 | 229 | 5.250<br>E-01 | 1.196 | 0.895 | 1.597 |
| k_Bacteria;p_Proteobacteria;c_Gammaproteobacteria; o_Enterobacteriales;f_Enterobacteriaceae;g_Citrobacter;s__      | 495 | 230 | 5.350<br>E-01 | 0.607 | 0.221 | 1.211 |
| k_Bacteria;p_Proteobacteria;c_Alphaproteobacteria; o_Rickettsiales;f__;g__;s__                                     | 29  | 231 | 5.376<br>E-01 | 0.908 | 0.769 | 1.055 |
| k_Bacteria;p_Actinobacteria;c_Actinobacteria; o_Actinomycetales;f_Dermacoccaceae;g_Dermacoccus;s__                 | 166 | 232 | 5.376<br>E-01 | 1.122 | 0.928 | 1.355 |
| k_Bacteria;p_Bacteroidetes;c_Bacteroidia; o_Bacteroidales;f_Porphyrimonadaceae;g_Parabacteroides;s__               | 249 | 233 | 5.388<br>E-01 | 0.710 | 0.344 | 1.130 |
| k_Bacteria;p_Firmicutes;c_Clostridia; o_Clostridiales;f_[Tissierellaceae];g_1-68;s__                               | 207 | 234 | 5.391<br>E-01 | 1.081 | 0.950 | 1.227 |
| k_Bacteria;p_Proteobacteria;c_Alphaproteobacteria; o_Rhizobiales;f_Phyllobacteriaceae;g_Mesorhizobium;s__          | 133 | 235 | 5.391<br>E-01 | 1.116 | 0.930 | 1.333 |
| k_Bacteria;p_Proteobacteria;c_Betaproteobacteria; o_Burkholderiales;f_Comamonadaceae;g_Variovorax;s__              | 465 | 236 | 5.391<br>E-01 | 1.944 | 0.673 | 7.018 |
| k_Bacteria;p_Bacteroidetes;c_Flavobacteriia; o_Flavobacteriales;f_Flavobacteriaceae;g_Flavobacterium;s_succinicans | 550 | 237 | 5.391<br>E-01 | 1.360 | 0.813 | 2.274 |
| k_Bacteria;p_Proteobacteria;c_Alphaproteobacteria; o_Rhizobiales;f_Phyllobacteriaceae;g__;s__                      | 87  | 238 | 5.394<br>E-01 | 1.108 | 0.935 | 1.309 |
| k_Bacteria;p_Proteobacteria;c_Gammaproteobacteria; o_Pseudomonadales;f_Pseudomonadaceae;g_Pseudomonas;s__          | 306 | 239 | 5.411<br>E-01 | 0.937 | 0.840 | 1.044 |
| k_Bacteria;p_Firmicutes;c_Bacilli; o_Lactobacillales;f_Streptococcaceae;g_Lactococcus;s__                          | 320 | 240 | 5.411<br>E-01 | 0.907 | 0.767 | 1.059 |
| k_Bacteria;p_Proteobacteria;c_Alphaproteobacteria; o_Caulobacterales;f_Caulobacteraceae;g__;s__                    | 78  | 241 | 5.440<br>E-01 | 0.941 | 0.851 | 1.041 |
| k_Bacteria;p_Proteobacteria;c_Deltaproteobacteria; o__;f__;g__;s__                                                 | 474 | 242 | 5.440<br>E-01 | 1.242 | 0.864 | 1.854 |
| k_Bacteria;p_Bacteroidetes;c_Bacteroidia; o_Bacteroidales;f_Bacteroidaceae;g_Bacteroides;s_ovatus                  | 335 | 243 | 5.440<br>E-01 | 1.164 | 0.899 | 1.507 |
| k_Bacteria;p_Actinobacteria;c_Actinobacteria; o_Actinomycetales;f_Pseudonocardiaceae;g_Pseudonocardia;s__          | 209 | 244 | 5.449<br>E-01 | 1.215 | 0.872 | 1.700 |
| k_Bacteria;p_Actinobacteria;c_Thermoleophilia; o_Solirubrobacterales;f__;g__;s__                                   | 6   | 245 | 5.449<br>E-01 | 1.052 | 0.965 | 1.146 |
| k_Bacteria;p_Proteobacteria;c_Betaproteobacteria; o_Hydrogenophilales;f_Hydrogenophilaceae;g_Thiobacillus;s__      | 467 | 246 | 5.541<br>E-01 | 0.762 | 0.436 | 1.144 |

|                                                                                                                           |     |     |               |       |       |       |
|---------------------------------------------------------------------------------------------------------------------------|-----|-----|---------------|-------|-------|-------|
| k_Bacteria;p_Actinobacteria;c_Actinobacteria;o_Actinomycetales;f_Microbacteriaceae;g_CandidatusAquiluna;s_rubra           | 65  | 247 | 5.645<br>E-01 | 0.940 | 0.840 | 1.040 |
| k_Bacteria;p_Firmicutes;c_Bacilli;o_Bacillales;f_Listeriaceae;g_Brochothrix;s__                                           | 403 | 248 | 5.645<br>E-01 | 0.742 | 0.382 | 1.147 |
| k_Bacteria;p_Proteobacteria;c_Alphaproteobacteria;o_Rhizobiales;f_Bradyrhizobiaceae;g_Balneimonas;s__                     | 449 | 249 | 5.658<br>E-01 | 0.556 | 0.126 | 1.224 |
| k_Bacteria;p_Firmicutes;c_Clostridia;o_Clostridiales;f_Lachnospiraceae;g__;s__                                            | 25  | 250 | 5.706<br>E-01 | 1.061 | 0.956 | 1.177 |
| k_Bacteria;p_Actinobacteria;c_Actinobacteria;o_Actinomycetales;f_Nocardiaceae;g_Rhodococcus;s__                           | 102 | 251 | 5.706<br>E-01 | 1.083 | 0.940 | 1.248 |
| k_Bacteria;p_Actinobacteria;c_Actinobacteria;o_Actinomycetales;f_Micrococcaceae;g_Rothia;s_dentocariosa                   | 105 | 252 | 5.706<br>E-01 | 1.055 | 0.960 | 1.158 |
| k_Bacteria;p_Actinobacteria;c_Actinobacteria;o_Actinomycetales;f__;g__;s__                                                | 5   | 253 | 5.706<br>E-01 | 1.044 | 0.968 | 1.124 |
| k_Bacteria;p_Proteobacteria;c_Gammaproteobacteria;o_Pasteurellales;f_Pasteurellaceae;g_Haemophilus;s_influenzae           | 529 | 254 | 5.706<br>E-01 | 0.531 | 0.072 | 1.067 |
| k_Bacteria;p_Proteobacteria;c_Epsilonproteobacteria;o_Campylobacteriales;f_Campylobacteraceae;g_Arcobacter;s__            | 122 | 255 | 5.742<br>E-01 | 0.866 | 0.652 | 1.094 |
| k_Bacteria;p_Proteobacteria;c_Deltaproteobacteria;o_Bdellovibrionales;f_Bacteriovoracaceae;g__;s__                        | 475 | 256 | 5.742<br>E-01 | 0.683 | 0.243 | 1.141 |
| k_Bacteria;p_Proteobacteria;c_Alphaproteobacteria;o_Caulobacteriales;f_Caulobacteraceae;g_Brevundimonas;s_diminuta        | 211 | 257 | 5.742<br>E-01 | 1.095 | 0.930 | 1.287 |
| k_Bacteria;p_Acidobacteria;c_Acidobacteria-6;o_iii1-15;f__;g__;s__                                                        | 267 | 258 | 5.742<br>E-01 | 1.145 | 0.896 | 1.460 |
| k_Bacteria;p_Firmicutes;c_Bacilli;o_Lactobacillales;f_Carnobacteriaceae;g__;s__                                           | 283 | 259 | 5.755<br>E-01 | 1.103 | 0.924 | 1.313 |
| k_Bacteria;p_Fusobacteria;c_Fusobacteriia;o_Fusobacteriales;f_Leptotrichiaceae;g__;s__                                    | 140 | 260 | 5.815<br>E-01 | 0.751 | 0.394 | 1.168 |
| k_Bacteria;p_Proteobacteria;c_Alphaproteobacteria;o_Rhizobiales;f_Methylobacteriaceae;g__;s__                             | 109 | 261 | 5.858<br>E-01 | 1.074 | 0.943 | 1.221 |
| k_Bacteria;p_Proteobacteria;c_Betaproteobacteria;o_Burkholderiales;f_Oxalobacteraceae;g_Polynucleobacter;s_cosmopolitanus | 524 | 262 | 5.873<br>E-01 | 0.910 | 0.759 | 1.070 |
| k_Bacteria;p_Firmicutes;c_Clostridia;o_Clostridiales;f_Lachnospiraceae;g_Lachnospira;s__                                  | 203 | 263 | 5.873<br>E-01 | 0.753 | 0.390 | 1.168 |
| k_Bacteria;p_Proteobacteria;c_Alphaproteobacteria;o_Rhizobiales;f_Hyphomicrobiaceae;g_Rhodoplanes;s__                     | 45  | 264 | 5.970<br>E-01 | 1.101 | 0.920 | 1.312 |
| k_Bacteria;p_Proteobacteria;c_Betaproteobacteria;o_Burkholderiales;f_Burkholderiaceae;g_Lautropia;s__                     | 149 | 265 | 6.031<br>E-01 | 0.919 | 0.781 | 1.069 |
| k_Bacteria;p_Proteobacteria;c_Alphaproteobacteria;o_Rhodospirillales;f_Acetobacteraceae;g_Roseomonas;s_mucosa             | 99  | 266 | 6.122<br>E-01 | 1.140 | 0.886 | 1.464 |
| k_Bacteria;p_Bacteroidetes;c_Flavobacteriia;o_Flavobacteriales;f_Flavobacteriaceae;g_Flavobacterium;s__                   | 69  | 267 | 6.122<br>E-01 | 1.058 | 0.951 | 1.175 |
| k_Bacteria;p_TM7;c_TM7-3;o_I025;f__;g__;s__                                                                               | 512 | 268 | 6.166<br>E-01 | 0.735 | 0.294 | 1.155 |
| k_Bacteria;p_Firmicutes;c_Clostridia;o_Clostridiales;f_[Tissierellaceae];g_Peptoniphilus;s__                              | 186 | 269 | 6.263<br>E-01 | 0.962 | 0.894 | 1.036 |
| k_Bacteria;p_Firmicutes;c_Bacilli;o_Lactobacillales;f_Streptococcaceae;g_Streptococcus;s__                                | 34  | 270 | 6.272<br>E-01 | 1.057 | 0.951 | 1.179 |
| k_Bacteria;p_Bacteroidetes;c_[Rhodothermi];o_[Rhodothermale s];f_Rhodothermaceae;g_Rubricoccus;s__                        | 364 | 271 | 6.297<br>E-01 | 1.099 | 0.911 | 1.320 |
| k_Bacteria;p_Proteobacteria;c_Gammaproteobacteria;o_Alteromonadales;f_[Chromatiaceae];g__;s__                             | 490 | 272 | 6.311<br>E-01 | 0.442 | 0.044 | 1.474 |
| k_Bacteria;p_Firmicutes;c_Bacilli;o_Lactobacillales;f_Aerococcaceae;g_Alloiooccus;s_otitis                                | 536 | 273 | 6.325<br>E-01 | 0.629 | 0.164 | 1.286 |
| k_Bacteria;p_Bacteroidetes;c_Bacteroidia;o_Bacteroidales;f_Bacteroidaceae;g_Bacteroides;s__                               | 328 | 274 | 6.325<br>E-01 | 0.929 | 0.801 | 1.069 |
| k_Bacteria;p_Proteobacteria;c_Gammaproteobacteria;o_Methylcoccales;f_Methylococcaceae;g_Methylocaldum;s__                 | 504 | 275 | 6.325<br>E-01 | 0.922 | 0.778 | 1.073 |
| k_Bacteria;p_Proteobacteria;c_Alphaproteobacteria;o_Rhodospirillales;f_Rhodospirillaceae;g_Azospirillum;s__               | 457 | 276 | 6.325<br>E-01 | 0.811 | 0.510 | 1.179 |
| k_Bacteria;p_Proteobacteria;c_Gammaproteobacteria;o_Aeromonadales;f_Aeromonadaceae;g__;s__                                | 72  | 277 | 6.325<br>E-01 | 0.924 | 0.786 | 1.073 |

|                                                                                                                |     |     |               |       |       |            |
|----------------------------------------------------------------------------------------------------------------|-----|-----|---------------|-------|-------|------------|
| k_Bacteria;p_Tenericutes;c_Mollicutes;o_Mycoplasmatales;f_Mycoplasmataceae;g_Mycoplasma;s__                    | 254 | 278 | 6.366<br>E-01 | 1.131 | 0.880 | 1.451      |
| k_Bacteria;p_Actinobacteria;c_Actinobacteria;o_Actinomycetales;f_ACK-M1;g__;s__                                | 344 | 279 | 6.366<br>E-01 | 0.917 | 0.763 | 1.080      |
| k_Bacteria;p_Cyanobacteria;c_Synechococcophycideae;o_Synechococcales;f_Synechococcaceae;g_Synechococcus;s__    | 21  | 280 | 6.383<br>E-01 | 0.946 | 0.842 | 1.051      |
| k_Bacteria;p_Bacteroidetes;c_Cytophagia;o_Cytophagales;f_Cytophagaceae;g_Hymenobacter;s__                      | 39  | 281 | 6.385<br>E-01 | 1.049 | 0.953 | 1.152      |
| k_Bacteria;p_Firmicutes;c_Clostridia;o_Clostridiales;f_[Tissierellaceae];g_WAL_1855D;s__                       | 272 | 282 | 6.482<br>E-01 | 0.934 | 0.807 | 1.065      |
| k_Bacteria;p_Bacteroidetes;c_Flavobacteriia;o_Flavobacteriales;f_Flavobacteriaceae;g__;s__                     | 375 | 283 | 6.482<br>E-01 | 0.917 | 0.762 | 1.084      |
| k_Bacteria;p_Proteobacteria;c_Alphaproteobacteria;o_Rhodobacterales;f_Rhodobacteraceae;g__;s__                 | 13  | 284 | 6.539<br>E-01 | 0.947 | 0.847 | 1.056      |
| k_Bacteria;p_Bacteroidetes;c_Cytophagia;o_Cytophagales;f_Cytophagaceae;g_Rudanella;s__                         | 373 | 285 | 6.539<br>E-01 | 1.099 | 0.900 | 1.335      |
| k_Bacteria;p_TM6;c_F38;o__;f__;g__;s__                                                                         | 97  | 286 | 6.618<br>E-01 | 0.917 | 0.759 | 1.089      |
| k_Bacteria;p_Actinobacteria;c_Actinobacteria;o_Actinomycetales;f_Nocardioidaceae;g_Nocardioides;s_plantarum    | 127 | 287 | 6.623<br>E-01 | 0.915 | 0.754 | 1.094      |
| k_Bacteria;p_Chlamydiae;c_Chlamydia;o_Chlamydiales;f_Parachlamydiaceae;g_CandidatusProtochlamydia;s__          | 379 | 288 | 6.623<br>E-01 | 0.821 | 0.454 | 1.149      |
| k_Bacteria;p_Firmicutes;c_Bacilli;o_Lactobacillales;f_Streptococcaceae;g_Streptococcus;s_minor                 | 143 | 289 | 6.646<br>E-01 | 0.878 | 0.654 | 1.137      |
| k_Bacteria;p_Firmicutes;c_Bacilli;o_Lactobacillales;f_Aerococcaceae;g_Alloiooccus;s__                          | 300 | 290 | 6.651<br>E-01 | 1.026 | 0.972 | 1.083      |
| k_Bacteria;p_TM7;c__;o__;f__;g__;s__                                                                           | 75  | 291 | 6.651<br>E-01 | 0.924 | 0.772 | 1.083      |
| k_Bacteria;p_Firmicutes;c_Bacilli;o_Bacillales;f_Staphylococcaceae;g_Staphylococcus;s_pettenkoferi             | 538 | 292 | 6.651<br>E-01 | 0.506 | 0.064 | 1.578      |
| k_Bacteria;p_Actinobacteria;c_Actinobacteria;o_Actinomycetales;f_Sporichthyaceae;g__;s__                       | 146 | 293 | 6.651<br>E-01 | 1.122 | 0.874 | 1.429      |
| k_Bacteria;p_Proteobacteria;c_Betaproteobacteria;o_Neisseriales;f_Neisseriaceae;g_Kingella;s__                 | 226 | 294 | 6.651<br>E-01 | 0.895 | 0.690 | 1.116      |
| k_Bacteria;p_Actinobacteria;c_Actinobacteria;o_Actinomycetales;f_Corynebacteriaceae;g_Corynebacterium;s_bovis  | 521 | 295 | 6.651<br>E-01 | 1.832 | 0.669 | 22.12<br>2 |
| k_Bacteria;p_Firmicutes;c_Bacilli;o_Bacillales;f_Staphylococcaceae;g_Salinicoccus;s__                          | 406 | 296 | 6.651<br>E-01 | 1.799 | 0.684 | 21.01<br>0 |
| k_Bacteria;p_Actinobacteria;c_Actinobacteria;o_Actinomycetales;f_Nocardioidaceae;g__;s__                       | 46  | 297 | 6.651<br>E-01 | 0.947 | 0.841 | 1.063      |
| k_Bacteria;p_Proteobacteria;c_Betaproteobacteria;o_SC-I-84;f__;g__;s__                                         | 473 | 298 | 6.651<br>E-01 | 1.100 | 0.892 | 1.346      |
| k_Bacteria;p_Proteobacteria;c_Gammaproteobacteria;o_Vibrionales;f_Vibrionaceae;g_Vibrio;s__                    | 299 | 299 | 6.651<br>E-01 | 1.170 | 0.827 | 1.642      |
| k_Bacteria;p_[Thermi];c_Deinococci;o_Deinococcales;f_Deinococcaceae;g_Deinococcus;s_aquatilis                  | 112 | 300 | 6.651<br>E-01 | 0.927 | 0.779 | 1.084      |
| k_Bacteria;p_Bacteroidetes;c_Flavobacteriia;o_Flavobacteriales;f_Flavobacteriaceae;g_Capnocytophaga;s__        | 117 | 301 | 6.694<br>E-01 | 0.944 | 0.830 | 1.066      |
| k_Bacteria;p_Actinobacteria;c_Actinobacteria;o_Actinomycetales;f_Geodermatophilaceae;g_Geodermatophilus;s__    | 346 | 302 | 6.802<br>E-01 | 0.590 | 0.113 | 1.515      |
| k_Bacteria;p_Gemmatimonadetes;c_Gemm-3;o__;f__;g__;s__                                                         | 431 | 303 | 6.802<br>E-01 | 1.465 | 0.662 | 5.137      |
| k_Bacteria;p_Actinobacteria;c_Actinobacteria;o_Actinomycetales;f_Micromonosporaceae;g__;s__                    | 252 | 304 | 6.816<br>E-01 | 0.871 | 0.627 | 1.164      |
| k_Bacteria;p_Proteobacteria;c_Gammaproteobacteria;o_Pseudomonadales;f_Moraxellaceae;g_Alkanindiges;s__         | 290 | 305 | 6.816<br>E-01 | 1.151 | 0.834 | 1.574      |
| k_Bacteria;p_Proteobacteria;c_Alphaproteobacteria;o_Rhizobiales;f_Aurantimonadaceae;g__;s__                    | 162 | 306 | 6.816<br>E-01 | 1.072 | 0.916 | 1.250      |
| k_Bacteria;p_Proteobacteria;c_Alphaproteobacteria;o_Rhodobacterales;f_Rhodobacteraceae;g_Paracoccus;s_marcusii | 38  | 307 | 6.876<br>E-01 | 0.946 | 0.833 | 1.069      |
| k_Bacteria;p_Proteobacteria;c_Alphaproteobacteria;o_Sphingomonadales;f_Sphingomonadaceae;g_Sphingobium;s__     | 256 | 308 | 6.977<br>E-01 | 0.934 | 0.795 | 1.087      |

|                                                                                                                       |     |     |               |       |       |       |
|-----------------------------------------------------------------------------------------------------------------------|-----|-----|---------------|-------|-------|-------|
| k_Bacteria;p_Bacteroidetes;c_[Saprospirae];o_[Saprospirales];f__Chitinophagaceae;g_Segetibacter;s__                   | 365 | 309 | 6.977<br>E-01 | 0.793 | 0.385 | 1.244 |
| k_Bacteria;p_Proteobacteria;c_Alphaproteobacteria;o_Rhizobiales;f_Phylobacteriaceae;g_Aminobacter;s__                 | 273 | 310 | 6.977<br>E-01 | 0.924 | 0.766 | 1.102 |
| k_Bacteria;p_Actinobacteria;c_Actinobacteria;o_Actinomycetales;f_Micrococaceae;g_Arthrobacter;s__                     | 163 | 311 | 6.996<br>E-01 | 1.069 | 0.914 | 1.246 |
| k_Bacteria;p_Proteobacteria;c_Alphaproteobacteria;o_Rhodobacterales;f_Rhodobacteraceae;g_Rhodobacter;s__              | 455 | 312 | 6.996<br>E-01 | 0.915 | 0.738 | 1.115 |
| k_Bacteria;p_Proteobacteria;c_Gammaproteobacteria;o_Vibrionales;f_Vibrionaceae;g_Photobacterium;s__                   | 507 | 313 | 6.996<br>E-01 | 0.805 | 0.398 | 1.228 |
| k_Bacteria;p_Firmicutes;c_Bacilli;o_Lactobacillales;f_Enterococaceae;g_Enterococcus;s__                               | 193 | 314 | 7.030<br>E-01 | 0.847 | 0.553 | 1.213 |
| k_Bacteria;p_Firmicutes;c_Clostridia;o_Clostridiales;f_Veillonellaceae;g__s__                                         | 424 | 315 | 7.152<br>E-01 | 0.837 | 0.503 | 1.223 |
| k_Bacteria;p_Proteobacteria;c_Alphaproteobacteria;o_Rhizobiales;f_Methylocystaceae;g_Methylosinus;s__                 | 41  | 316 | 7.188<br>E-01 | 0.941 | 0.809 | 1.084 |
| k_Bacteria;p_Actinobacteria;c_KIST-JJY010;o__f__g__s__                                                                | 357 | 317 | 7.291<br>E-01 | 0.926 | 0.759 | 1.107 |
| k_Bacteria;p_Firmicutes;c_Bacilli;o_Bacillales;f_Paenibacillaceae;g_Aneurinibacillus;s__                              | 404 | 318 | 7.370<br>E-01 | 0.756 | 0.299 | 1.365 |
| k_Bacteria;p_Firmicutes;c_Bacilli;o_Lactobacillales;f_Enterococaceae;g__s__                                           | 130 | 319 | 7.473<br>E-01 | 0.924 | 0.749 | 1.117 |
| k_Bacteria;p_Actinobacteria;c_Acidimicrobia;o_Acidimicrobiales;f_Microthrixaceae;g_CandidatusMicrothrix;s__parvicella | 288 | 320 | 7.479<br>E-01 | 0.845 | 0.513 | 1.242 |
| k_Bacteria;p_Actinobacteria;c_Thermoleophilia;o_Solirubrobacterales;f_Conexibacteraceae;g__s__                        | 123 | 321 | 7.479<br>E-01 | 1.092 | 0.871 | 1.357 |
| k_Bacteria;p_Proteobacteria;c_Alphaproteobacteria;o_Rhodobacterales;f_Rhodobacteraceae;g_Rubellimicrobium;s__         | 120 | 322 | 7.491<br>E-01 | 0.949 | 0.827 | 1.079 |
| k_Bacteria;p_Cyanobacteria;c_Chloroplast;o_Chlorophyta;f_Chlamydomonadaceae;g__s__                                    | 396 | 323 | 7.501<br>E-01 | 0.925 | 0.751 | 1.117 |
| k_Bacteria;p_Acidobacteria;c_[Chloracidobacteria];o_RB41;f_Ellin6075;g__s__                                           | 26  | 324 | 7.501<br>E-01 | 1.048 | 0.927 | 1.181 |
| k_Bacteria;p_Actinobacteria;c_Actinobacteria;o_Actinomycetales;f_Propionibacteriaceae;g_Luteococcus;s__               | 352 | 325 | 7.501<br>E-01 | 1.293 | 0.664 | 3.152 |
| k_Bacteria;p_Firmicutes;c_Clostridia;o_Clostridiales;f_Clostridiaceae;g__s__                                          | 12  | 326 | 7.501<br>E-01 | 0.954 | 0.841 | 1.074 |
| k_Bacteria;p_Proteobacteria;c_Alphaproteobacteria;o_Rhizobiales;f_Methylocystaceae;g__s__                             | 453 | 327 | 7.501<br>E-01 | 0.754 | 0.275 | 1.389 |
| k_Bacteria;p_Actinobacteria;c_Acidimicrobia;o_Acidimicrobiales;f_EB1017;g__s__                                        | 44  | 328 | 7.501<br>E-01 | 0.936 | 0.787 | 1.105 |
| k_Bacteria;p_Cyanobacteria;c_Chloroplast;o_Chlorophyta;f__g__s__                                                      | 86  | 329 | 7.501<br>E-01 | 0.958 | 0.853 | 1.065 |
| k_Bacteria;p_Firmicutes;c_Clostridia;o_Clostridiales;f_Peptostreptococaceae;g_Peptostreptococcus;s__anaerobius        | 517 | 330 | 7.502<br>E-01 | 0.684 | 0.163 | 1.517 |
| k_Bacteria;p_Proteobacteria;c_Gammaproteobacteria;o_Xanthomonadales;f_Xanthomonadaceae;g_Lysobacter;s__brunescens     | 522 | 331 | 7.520<br>E-01 | 0.781 | 0.280 | 1.305 |
| k_Bacteria;p_Actinobacteria;c_Actinobacteria;o_Actinomycetales;f_Corynebacteriaceae;g_Corynebacterium;s__lubricantis  | 255 | 332 | 7.528<br>E-01 | 0.924 | 0.744 | 1.128 |
| k_Bacteria;p_Bacteroidetes;c_Flavobacteriia;o_Flavobacteriales;f_Flavobacteriaceae;g_Flavobacterium;s__frigidarium    | 528 | 333 | 7.528<br>E-01 | 0.617 | 0.120 | 1.875 |
| k_Bacteria;p_Firmicutes;c_Clostridia;o_Clostridiales;f_Ruminococcaceae;g_Ruminococcus;s__                             | 80  | 334 | 7.528<br>E-01 | 0.935 | 0.778 | 1.110 |
| k_Bacteria;p_Firmicutes;c_Bacilli;o_Turicibacterales;f_Turicibacteraceae;g_Turicibacter;s__                           | 95  | 335 | 7.559<br>E-01 | 1.061 | 0.905 | 1.238 |
| k_Bacteria;p_Proteobacteria;c_Alphaproteobacteria;o_Rhodobacterales;f_Hyphomonadaceae;g__s__                          | 106 | 336 | 7.638<br>E-01 | 1.093 | 0.855 | 1.384 |
| k_Bacteria;p_Bacteroidetes;c_Flavobacteriia;o_Flavobacteriales;f_[Weeksellaceae];g_Cloacibacterium;s__                | 332 | 337 | 7.638<br>E-01 | 1.057 | 0.909 | 1.224 |
| k_Bacteria;p_Proteobacteria;c_Alphaproteobacteria;o_Rhizobiales;f_Hyphomicrobiaceae;g_Hyphomicrobium;s__              | 37  | 338 | 7.642<br>E-01 | 0.954 | 0.835 | 1.080 |
| k_Bacteria;p_Spirochaetes;c_Spirochaetes;o_Spirochaetales;f_Spirochaetaceae;g_Treponema;s__                           | 200 | 339 | 7.752<br>E-01 | 1.118 | 0.810 | 1.526 |

|                                                                                                                      |     |     |               |       |       |       |
|----------------------------------------------------------------------------------------------------------------------|-----|-----|---------------|-------|-------|-------|
| k_Bacteria;p_Proteobacteria;c_Alphaproteobacteria;o_Rhizobiales;f_Rhizobiaceae;g_Rhizobium;s__                       | 291 | 340 | 7.752<br>E-01 | 1.120 | 0.808 | 1.532 |
| k_Bacteria;p_Actinobacteria;c_Actinobacteria;o_Actinomycetales;f_Streptomycetaceae;g_Streptomyces;s__                | 354 | 341 | 7.752<br>E-01 | 1.243 | 0.656 | 2.371 |
| k_Bacteria;p_Proteobacteria;c_Betaproteobacteria;o_Procabbacteriales;f_Procabbacteriaceae;g__;s__                    | 470 | 342 | 7.926<br>E-01 | 0.899 | 0.630 | 1.188 |
| k_Bacteria;p_Firmicutes;c_Bacilli;o_Bacillales;f_Bacillaceae;g_Bacillus;s_selenatarsenatis                           | 547 | 343 | 7.969<br>E-01 | 0.786 | 0.316 | 1.417 |
| k_Bacteria;p_Proteobacteria;c_Betaproteobacteria;o_Burkholderiales;f_Oxalobacteraceae;g_Ralstonia;s__                | 136 | 344 | 7.978<br>E-01 | 0.962 | 0.860 | 1.075 |
| k_Bacteria;p_Proteobacteria;c_Deltaproteobacteria;o_Bdellovibrionales;f_Bdellovibrionaceae;g_Bdellovibrio;s__        | 124 | 345 | 8.194<br>E-01 | 1.068 | 0.873 | 1.296 |
| k_Bacteria;p_Chloroflexi;c_Anaerolineae;o_Caldilineales;f_Caldilineaceae;g_Caldilinea;s__                            | 387 | 346 | 8.194<br>E-01 | 1.066 | 0.874 | 1.289 |
| k_Bacteria;p_Firmicutes;c_Clostridia;o_Clostridiales;f_Lachnospiraceae;g_Moryella;s__                                | 73  | 347 | 8.194<br>E-01 | 0.954 | 0.822 | 1.093 |
| k_Bacteria;p_Firmicutes;c_Clostridia;o_Clostridiales;f_Lachnospiraceae;g_Blautia;s__                                 | 301 | 348 | 8.194<br>E-01 | 0.956 | 0.833 | 1.092 |
| k_Bacteria;p_Proteobacteria;c_Gammaproteobacteria;o_Alteromonadales;f_Chromatiaceae;g_Rheinheimera;s__               | 326 | 349 | 8.263<br>E-01 | 0.865 | 0.527 | 1.312 |
| k_Bacteria;p_Bacteroidetes;c_Cytophagia;o_Cytophagales;f_Cytophagaceae;g_Spirosoma;s__                               | 245 | 350 | 8.291<br>E-01 | 1.058 | 0.882 | 1.258 |
| k_Bacteria;p_Chloroflexi;c_TK17;o_mle1-48;f__;g__;s__                                                                | 393 | 351 | 8.427<br>E-01 | 1.134 | 0.742 | 1.716 |
| k_Bacteria;p_Firmicutes;c_Bacilli;o_Lactobacillales;f_Enterococcaceae;g_Vagococcus;s__                               | 411 | 352 | 8.457<br>E-01 | 0.613 | 0.075 | 2.406 |
| k_Bacteria;p_Proteobacteria;c_Gammaproteobacteria;o_Pseudomonadales;f_Moraxellaceae;g_Acinetobacter;s_johnsonii      | 232 | 353 | 8.473<br>E-01 | 1.048 | 0.902 | 1.216 |
| k_Bacteria;p_Proteobacteria;c_Gammaproteobacteria;o_Legionellales;f_Legionellaceae;g__;s__                           | 17  | 354 | 8.473<br>E-01 | 1.039 | 0.916 | 1.175 |
| k_Bacteria;p_Chlamydiae;c_Chlamydia;o_Chlamydiales;f__;g__;s__                                                       | 67  | 355 | 8.532<br>E-01 | 0.964 | 0.850 | 1.083 |
| k_Bacteria;p_Proteobacteria;c_Betaproteobacteria;o_Rhodocyclales;f_Rhodocyclaceae;g_Hydrogenophilus;s__              | 472 | 356 | 8.532<br>E-01 | 0.872 | 0.507 | 1.312 |
| k_Bacteria;p_[Thermi];c_Deinococci;o_Deinococcales;f_Deinococcaceae;g_CM44;s__                                       | 336 | 357 | 8.720<br>E-01 | 1.081 | 0.818 | 1.408 |
| k_Bacteria;p_Firmicutes;c_Bacilli;o_Bacillales;f_Bacillaceae;g_Bacillus;s__                                          | 126 | 358 | 8.720<br>E-01 | 1.040 | 0.908 | 1.189 |
| k_Bacteria;p_Planctomycetes;c_Planctomycetia;o_B97;f__;g__;s__                                                       | 445 | 359 | 8.720<br>E-01 | 1.095 | 0.794 | 1.485 |
| k_Bacteria;p_Actinobacteria;c_Actinobacteria;o_Actinomycetales;f_Actinomycetaceae;g_Mobiluncus;s__                   | 345 | 360 | 8.737<br>E-01 | 1.090 | 0.797 | 1.468 |
| k_Bacteria;p_Actinobacteria;c_Actinobacteria;o_Actinomycetales;f_Pseudonocardiaceae;g_Saccharopolyspora;s__          | 353 | 361 | 8.761<br>E-01 | 0.855 | 0.415 | 1.386 |
| k_Bacteria;p_Firmicutes;c_Clostridia;o_Clostridiales;f_Clostridiaceae;g_Clostridium;s__                              | 182 | 362 | 8.761<br>E-01 | 1.045 | 0.893 | 1.219 |
| k_Bacteria;p_Actinobacteria;c_Actinobacteria;o_Actinomycetales;f_Nocardiopepsaceae;g__;s__                           | 351 | 363 | 8.761<br>E-01 | 0.797 | 0.293 | 1.628 |
| k_Bacteria;p_Firmicutes;c_Clostridia;o_Clostridiales;f_Peptostreptococcaceae;g_Peptostreptococcus;s__                | 31  | 364 | 8.770<br>E-01 | 1.037 | 0.909 | 1.177 |
| k_Bacteria;p_Proteobacteria;c_Deltaproteobacteria;o_Myxococcales;f__;g__;s__                                         | 233 | 365 | 8.954<br>E-01 | 1.044 | 0.888 | 1.220 |
| k_Bacteria;p_Firmicutes;c_Bacilli;o_Lactobacillales;f_Aerococcaceae;g__;s__                                          | 333 | 366 | 8.954<br>E-01 | 1.049 | 0.875 | 1.250 |
| k_Bacteria;p_Proteobacteria;c_Alphaproteobacteria;o_Sphingomonadales;f_Sphingomonadaceae;g_Sphingopyxis;s_alaskensis | 325 | 367 | 8.954<br>E-01 | 0.834 | 0.391 | 1.574 |
| k_Bacteria;p_Proteobacteria;c_Alphaproteobacteria;o_Rhodobacterales;f_Rhodobacteraceae;g_Paracoccus;s_aminovorans    | 98  | 368 | 8.954<br>E-01 | 1.059 | 0.855 | 1.314 |
| k_Bacteria;p_Actinobacteria;c_Actinobacteria;o_Actinomycetales;f_Cellulomonadaceae;g_Cellulomonas;s__                | 298 | 369 | 8.954<br>E-01 | 0.949 | 0.774 | 1.146 |
| k_Bacteria;p_Cyanobacteria;c_Chloroplast;o_Stramenopiles;f__;g__;s__                                                 | 77  | 370 | 8.954<br>E-01 | 1.028 | 0.925 | 1.137 |

|                                                                                                                                    |     |     |               |       |       |       |
|------------------------------------------------------------------------------------------------------------------------------------|-----|-----|---------------|-------|-------|-------|
| k_Bacteria;p_Bacteroidetes;c_Bacteroidia;o_Bacteroidales;f_Bacteroidaceae;g_Bacteroides;s_uniformis                                | 250 | 371 | 8.954<br>E-01 | 1.049 | 0.873 | 1.251 |
| k_Bacteria;p_Proteobacteria;c_Gammaproteobacteria;o_Leionellales;f_Coxiellaceae;g_Aquicella;s__                                    | 500 | 372 | 9.003<br>E-01 | 0.954 | 0.786 | 1.134 |
| k_Bacteria;p_Actinobacteria;c_Actinobacteria;o_Actinomycetales;f_Micrococccaceae;g_Arthrobacter;s_psychrolactophilus               | 540 | 373 | 9.003<br>E-01 | 1.115 | 0.714 | 1.694 |
| k_Bacteria;p_Bacteroidetes;c_Cytophagia;o_Cytophagales;f_Cytophagaceae;g_Dyadobacter;s__                                           | 331 | 374 | 9.003<br>E-01 | 0.949 | 0.769 | 1.153 |
| k_Bacteria;p_Actinobacteria;c_Acidimicrobiia;o_Acidimicrobiales;f_C111;g__;s__                                                     | 47  | 375 | 9.053<br>E-01 | 0.971 | 0.864 | 1.084 |
| k_Bacteria;p_Bacteroidetes;c_[Saprospirae];o_[Saprospirales];f_Chitinophagaceae;g_Flavisolibacter;s__                              | 164 | 376 | 9.056<br>E-01 | 0.937 | 0.700 | 1.189 |
| k_Bacteria;p_Bacteroidetes;c_[Saprospirae];o_[Saprospirales];f_Chitinophagaceae;g__;s__                                            | 141 | 377 | 9.066<br>E-01 | 0.962 | 0.821 | 1.117 |
| k_Bacteria;p_Firmicutes;c_Clostridia;o_Clostridiales;f__;g__;s__                                                                   | 270 | 378 | 9.072<br>E-01 | 0.953 | 0.781 | 1.149 |
| k_Bacteria;p_Actinobacteria;c_Actinobacteria;o_Actinomycetales;f_Williamsiaceae;g_Williamsia;s__                                   | 355 | 379 | 9.072<br>E-01 | 1.104 | 0.721 | 1.648 |
| k_Bacteria;p_Proteobacteria;c_Alphaproteobacteria;o_Rhodobacterales;f_Rhodobacteraceae;g_Jannaschia;s__                            | 454 | 380 | 9.072<br>E-01 | 1.105 | 0.725 | 1.639 |
| k_Bacteria;p_Proteobacteria;c_Gammaproteobacteria;o_Alteromonadales;f_Psychromonadaceae;g_Psychromonas;s__                         | 317 | 381 | 9.072<br>E-01 | 0.901 | 0.554 | 1.327 |
| k_Bacteria;p_Proteobacteria;c_Betaproteobacteria;o_SBl14;f__;g__;s__                                                               | 161 | 382 | 9.118<br>E-01 | 1.103 | 0.723 | 1.640 |
| k_Bacteria;p_Proteobacteria;c_Gammaproteobacteria;o_Oceanospirillales;f_Halomonadaceae;g_Halomonas;s__                             | 246 | 383 | 9.275<br>E-01 | 0.963 | 0.822 | 1.130 |
| k_Bacteria;p_Actinobacteria;c_Actinobacteria;o_Actinomycetales;f_Gordoniaceae;g_Gordonia;s__                                       | 280 | 384 | 9.305<br>E-01 | 1.074 | 0.774 | 1.462 |
| k_Bacteria;p_Bacteroidetes;c_Sphingobacteriia;o_Sphingobacteriales;f__;g__;s__                                                     | 377 | 385 | 9.315<br>E-01 | 0.902 | 0.497 | 1.346 |
| k_Bacteria;p_Actinobacteria;c_Actinobacteria;o_Actinomycetales;f_Nakamurellaceae;g__;s__                                           | 248 | 386 | 9.391<br>E-01 | 0.948 | 0.739 | 1.190 |
| k_Bacteria;p_Actinobacteria;c_Acidimicrobiia;o_Acidimicrobiales;f__;g__;s__                                                        | 10  | 387 | 9.448<br>E-01 | 1.023 | 0.922 | 1.132 |
| k_Bacteria;p_Proteobacteria;c_Alphaproteobacteria;o_Rhodospirillales;f_Acetobacteraceae;g_Roseococcus;s__                          | 456 | 388 | 9.503<br>E-01 | 1.062 | 0.797 | 1.389 |
| k_Bacteria;p_Nitrospirae;c_Nitrospira;o_Nitrospirales;f_Nitrospiraceae;g_Nitrospira;s__                                            | 437 | 389 | 9.618<br>E-01 | 1.059 | 0.791 | 1.389 |
| k_Bacteria;p_TM7;c_SC3;o__;f__;g__;s__                                                                                             | 28  | 390 | 9.618<br>E-01 | 0.977 | 0.872 | 1.088 |
| k_Bacteria;p_Firmicutes;c_Clostridia;o_Clostridiales;f_Veillonellaceae;g_Veillonella;s_parvula                                     | 185 | 391 | 9.621<br>E-01 | 1.046 | 0.837 | 1.293 |
| k_Bacteria;p_Proteobacteria;c_Alphaproteobacteria;o_BD7-3;f__;g__;s__                                                              | 447 | 392 | 9.703<br>E-01 | 1.084 | 0.701 | 1.628 |
| k_Bacteria;p_Bacteroidetes;c_Bacteroidia;o_Bacteroidales;f_Porphryomonadaceae;g_Paludibacter;s__                                   | 229 | 393 | 9.841<br>E-01 | 0.947 | 0.700 | 1.233 |
| k_Bacteria;p_Proteobacteria;c_Betaproteobacteria;o_Burkholderiales;f_Oxalobacteraceae;g_Janthinobacterium;s__                      | 91  | 394 | 9.905<br>E-01 | 0.971 | 0.827 | 1.128 |
| k_Bacteria;p_Bacteroidetes;c_Bacteroidia;o_Bacteroidales;f_Bacteroidaceae;g_Bacteroides;s_caccae                                   | 329 | 395 | 9.905<br>E-01 | 0.923 | 0.566 | 1.375 |
| k_Bacteria;p_Proteobacteria;c_Gammaproteobacteria;o_Xanthomonadales;f_Xanthomonadaceae;g_Pseudoxanthomonas;s_mexicana              | 84  | 396 | 9.905<br>E-01 | 1.059 | 0.763 | 1.435 |
| k_Bacteria;p_Actinobacteria;c_Actinobacteria;o_Actinomycetales;f_Mycobacteriaceae;g_Mycobacterium;s__                              | 1   | 397 | 9.905<br>E-01 | 0.985 | 0.904 | 1.068 |
| k_Bacteria;p_Actinobacteria;c_Actinobacteria;o_Actinomycetales;f_Intrasporangiaceae;g__;s__                                        | 68  | 398 | 9.905<br>E-01 | 0.978 | 0.864 | 1.100 |
| k_Bacteria;p_Firmicutes;c_Clostridia;o_Thermoanaerobacterales;f_Caldicellulosiruptoraceae;g_Caldicellulosiruptor;s_saccharolyticus | 213 | 399 | 9.905<br>E-01 | 1.042 | 0.818 | 1.311 |
| k_Bacteria;p_Firmicutes;c_Clostridia;o_Clostridiales;f_Veillonellaceae;g_Veillonella;s_dispar                                      | 48  | 400 | 9.905<br>E-01 | 1.013 | 0.939 | 1.094 |

|                                                                                                                          |     |     |               |       |       |       |
|--------------------------------------------------------------------------------------------------------------------------|-----|-----|---------------|-------|-------|-------|
| k_Bacteria;p_Gemmatimonadetes;c_Gemmatimonadetes;o_Gemmatimonadales;f__;g__;s__                                          | 433 | 401 | 9.905<br>E-01 | 1.047 | 0.788 | 1.361 |
| k_Bacteria;p_Bacteroidetes;c_Flavobacteriia;o_Flavobacteriales;f_[Weeksellaceae];g_Chryseobacterium;s__                  | 237 | 402 | 9.905<br>E-01 | 0.981 | 0.875 | 1.097 |
| k_Bacteria;p_Firmicutes;c_Clostridia;o_Clostridiales;f_Veillonellaceae;g_Megasphaera;s__                                 | 212 | 403 | 9.905<br>E-01 | 1.023 | 0.889 | 1.171 |
| k_Bacteria;p_Firmicutes;c_Clostridia;o_Clostridiales;f_Lachnospiraceae;g_Oribacterium;s__                                | 79  | 404 | 9.905<br>E-01 | 1.022 | 0.893 | 1.162 |
| k_Bacteria;p_Firmicutes;c_Erysipelotrichi;o_Erysipelotrichales;f_Erysipelotrichaceae;g__;s__                             | 115 | 405 | 9.905<br>E-01 | 0.959 | 0.734 | 1.230 |
| k_Bacteria;p_Bacteroidetes;c_Bacteroidia;o_Bacteroidales;f_Porphyromonadaceae;g_Porphyromonas;s__                        | 155 | 406 | 9.905<br>E-01 | 0.985 | 0.897 | 1.081 |
| k_Bacteria;p_Bacteroidetes;c_Sphingobacteriia;o_Sphingobacteriales;f_Sphingobacteriaceae;g_Sphingobacterium;s_multivorum | 535 | 407 | 9.905<br>E-01 | 1.054 | 0.745 | 1.453 |
| k_Bacteria;p_Proteobacteria;c_Gammaproteobacteria;o_Legionellales;f_Coxiellaceae;g__;s__                                 | 499 | 408 | 9.905<br>E-01 | 1.034 | 0.827 | 1.276 |
| k_Bacteria;p_Actinobacteria;c_Acidimicrobiia;o_Acidimicrobiales;f_Microthrixaceae;g__;s__                                | 53  | 409 | 9.905<br>E-01 | 0.976 | 0.829 | 1.138 |
| k_Bacteria;p_Proteobacteria;c_Gammaproteobacteria;o_Xanthomonadales;f_Xanthomonadaceae;g_Luteimonas;s__                  | 508 | 410 | 9.905<br>E-01 | 0.861 | 0.197 | 2.106 |
| k_Bacteria;p_Firmicutes;c_Bacilli;o_Lactobacillales;f_Carnobacteriaceae;g_Granulicatella;s__                             | 27  | 411 | 9.905<br>E-01 | 0.988 | 0.909 | 1.071 |
| k_Bacteria;p_Firmicutes;c_Bacilli;o_Bacillales;f_Planococcaceae;g_Planomicrobium;s__                                     | 178 | 412 | 9.905<br>E-01 | 1.017 | 0.909 | 1.133 |
| k_Bacteria;p_Proteobacteria;c_Betaproteobacteria;o_Burkholderiales;f_Alcaligenaceae;g__;s__                              | 43  | 413 | 9.905<br>E-01 | 0.986 | 0.893 | 1.083 |
| k_Bacteria;p_Firmicutes;c_Bacilli;o_Gemellales;f_Gemellaceae;g_Gemella;s__                                               | 116 | 414 | 9.905<br>E-01 | 1.030 | 0.844 | 1.256 |
| k_Bacteria;p_Proteobacteria;c_Gammaproteobacteria;o_Enterobacteriales;f_Enterobacteriaceae;g_Proteus;s__                 | 222 | 415 | 9.905<br>E-01 | 1.020 | 0.886 | 1.165 |
| k_Bacteria;p_Proteobacteria;c_Gammaproteobacteria;o_Alteromonadales;f_Shewanellaceae;g_Shewanella;s_algae                | 251 | 416 | 9.905<br>E-01 | 0.978 | 0.840 | 1.141 |
| k_Bacteria;p_Proteobacteria;c_Alphaproteobacteria;o_Sphingomonadales;f__;g__;s__                                         | 32  | 417 | 9.905<br>E-01 | 0.979 | 0.844 | 1.128 |
| k_Bacteria;p_Firmicutes;c_Bacilli;o_Lactobacillales;f_Streptococcaceae;g__;s__                                           | 416 | 418 | 9.905<br>E-01 | 1.059 | 0.675 | 1.592 |
| k_Bacteria;p_TM7;c_TM7-3;o__;f__;g__;s__                                                                                 | 14  | 419 | 9.905<br>E-01 | 1.013 | 0.924 | 1.109 |
| k_Bacteria;p_Proteobacteria;c_Betaproteobacteria;o_Burkholderiales;f_Comamonadaceae;g_Hylemonella;s__                    | 234 | 420 | 9.905<br>E-01 | 1.097 | 0.536 | 2.124 |
| k_Bacteria;p_Bacteroidetes;c_Sphingobacteriia;o_Sphingobacteriales;f_Sphingobacteriaceae;g_Pedobacter;s__                | 89  | 421 | 9.905<br>E-01 | 1.013 | 0.922 | 1.111 |
| k_Bacteria;p_Cyanobacteria;c_Nostocophycideae;o_Stigonematales;f_Rivulariaceae;g_Calothrix;s__                           | 284 | 422 | 9.905<br>E-01 | 0.967 | 0.743 | 1.221 |
| k_Bacteria;p_Proteobacteria;c_Betaproteobacteria;o_Rhodocyclales;f_Rhodocyclaceae;g_Dechloromonas;s__                    | 187 | 423 | 9.905<br>E-01 | 1.026 | 0.840 | 1.241 |
| k_Bacteria;p_Proteobacteria;c_Alphaproteobacteria;o_Sphingomonadales;f_Sphingomonadaceae;g_Sphingomonas;s_yabuuchiae     | 553 | 424 | 9.905<br>E-01 | 0.941 | 0.529 | 1.467 |
| k_Bacteria;p_Actinobacteria;c_Actinobacteria;o_Actinomycetales;f_Actinomycetaceae;g_Actinomyces;s__                      | 30  | 425 | 9.905<br>E-01 | 0.989 | 0.909 | 1.076 |
| k_Bacteria;p_Proteobacteria;c_Betaproteobacteria;o_Burkholderiales;f_Comamonadaceae;g__;s__                              | 8   | 426 | 9.905<br>E-01 | 0.988 | 0.898 | 1.087 |
| k_Bacteria;p_TM6;c_SJA-4;o__;f__;g__;s__                                                                                 | 74  | 427 | 9.905<br>E-01 | 1.019 | 0.873 | 1.179 |
| k_Bacteria;p_Firmicutes;c_Bacilli;o_Gemellales;f_Gemellaceae;g__;s__                                                     | 88  | 428 | 9.905<br>E-01 | 0.988 | 0.897 | 1.086 |
| k_Bacteria;p_Proteobacteria;c_Betaproteobacteria;o_Neisseriales;f_Neisseriaceae;g__;s__                                  | 266 | 429 | 9.905<br>E-01 | 1.009 | 0.939 | 1.083 |
| k_Bacteria;p_Actinobacteria;c_Actinobacteria;o_Bifidobacteriales;f_Bifidobacteriaceae;g_Bifidobacterium;s_adolescentis   | 152 | 430 | 9.905<br>E-01 | 0.978 | 0.807 | 1.172 |

|                                                                                                                  |     |     |               |       |       |       |
|------------------------------------------------------------------------------------------------------------------|-----|-----|---------------|-------|-------|-------|
| k_Bacteria;p_Actinobacteria;c_Actinobacteria;o_Actinomycetales;f_Micrococcaceae;g__;s__                          | 118 | 431 | 9.905<br>E-01 | 1.011 | 0.922 | 1.108 |
| k_Bacteria;p_Proteobacteria;c_Betaproteobacteria;o_Burkholderiales;f_Comamonadaceae;g_Polaromonas;s__            | 206 | 432 | 9.905<br>E-01 | 0.974 | 0.772 | 1.218 |
| k_Bacteria;p_Proteobacteria;c_Betaproteobacteria;o_Methylophilales;f_Methylophilaceae;g__;s__                    | 24  | 433 | 9.905<br>E-01 | 1.016 | 0.885 | 1.159 |
| k_Bacteria;p_Proteobacteria;c_Gammaproteobacteria;o_Xanthomonadales;f_Sinobacteraceae;g__;s__                    | 268 | 434 | 9.905<br>E-01 | 0.987 | 0.882 | 1.104 |
| k_Bacteria;p_Acidobacteria;c_[Chloracidobacteria];o_RB41;f__;g__;s__                                             | 338 | 435 | 9.905<br>E-01 | 1.036 | 0.747 | 1.402 |
| k_Bacteria;p_Fusobacteria;c_Fusobacteriia;o_Fusobacteriales;f_Leptotrichiaceae;g_Sneathia;s__                    | 201 | 436 | 9.905<br>E-01 | 0.971 | 0.733 | 1.248 |
| k_Bacteria;p_Actinobacteria;c_Actinobacteria;o_Actinomycetales;f_Corynebacteriaceae;g_Corynebacterium;s_variable | 551 | 437 | 9.905<br>E-01 | 0.965 | 0.680 | 1.317 |
| k_Bacteria;p_Proteobacteria;c_Betaproteobacteria;o_Rhodocyclales;f_Rhodocyclaceae;g_C39;s__                      | 471 | 438 | 9.905<br>E-01 | 1.045 | 0.672 | 1.565 |
| k_Bacteria;p_Actinobacteria;c_Actinobacteria;o_Actinomycetales;f_Actinomycetaceae;g_Varibaculum;s__              | 278 | 439 | 9.905<br>E-01 | 0.974 | 0.740 | 1.248 |
| k_Bacteria;p_Firmicutes;c_Bacilli;o_Bacillales;f_Planococcaceae;g_Paenispoporarcina;s__                          | 60  | 440 | 9.905<br>E-01 | 0.991 | 0.901 | 1.084 |
| k_Bacteria;p_TM7;c_TM7-1;o__;f__;g__;s__                                                                         | 4   | 441 | 9.905<br>E-01 | 0.990 | 0.899 | 1.087 |
| k_Bacteria;p_Fusobacteria;c_Fusobacteriia;o_Fusobacteriales;f_Fusobacteriaceae;g_Fusobacterium;s__               | 66  | 442 | 9.905<br>E-01 | 1.009 | 0.923 | 1.102 |
| k_Bacteria;p_Proteobacteria;c_Alphaproteobacteria;o_Rhizobiales;f_Bradyrhizobiaceae;g__;s__                      | 49  | 443 | 9.905<br>E-01 | 1.011 | 0.903 | 1.134 |
| k_Bacteria;p_Proteobacteria;c_Deltaproteobacteria;o_Myxococcales;f_0319-6G20;g__;s__                             | 104 | 444 | 9.905<br>E-01 | 0.969 | 0.668 | 1.326 |
| k_Bacteria;p_Actinobacteria;c_Coriobacteriia;o_Coriobacteriales;f_Coriobacteriaceae;g_Eggerthella;s_lenta        | 258 | 445 | 9.905<br>E-01 | 1.038 | 0.660 | 1.573 |
| k_Bacteria;p_[Thermi];c_Deinococci;o_Deinococcales;f_Trueperaceae;g_Truepera;s__                                 | 92  | 446 | 9.905<br>E-01 | 1.015 | 0.842 | 1.210 |
| k_Bacteria;p_Firmicutes;c_Bacilli;o_Lactobacillales;f_Aerococcaceae;g_Abiotrophia;s__                            | 195 | 447 | 9.905<br>E-01 | 0.989 | 0.864 | 1.124 |
| k_Bacteria;p_Cyanobacteria;c_Oscillatorioophycideae;o_Chroococcales;f_Xenococcaceae;g_Chroococciopsis;s__        | 304 | 448 | 9.905<br>E-01 | 1.023 | 0.765 | 1.340 |
| k_Bacteria;p_Firmicutes;c_Clostridia;o_Clostridiales;f_[Tissierellaceae];g_ph2;s__                               | 419 | 449 | 9.905<br>E-01 | 0.971 | 0.650 | 1.372 |
| k_Bacteria;p_Proteobacteria;c_Gammaproteobacteria;o_Pseudomonadales;f_Moraxellaceae;g_Enhydrobacter;s__          | 103 | 450 | 9.905<br>E-01 | 1.010 | 0.896 | 1.137 |
| k_Bacteria;p_Proteobacteria;c_Alphaproteobacteria;o_Rhizobiales;f_Brucellaceae;g__;s__                           | 219 | 451 | 9.905<br>E-01 | 1.015 | 0.837 | 1.222 |
| k_Bacteria;p_Actinobacteria;c_Actinobacteria;o_Actinomycetales;f_Intrasporangiaceae;g_Arsenicicoccus;s__         | 347 | 452 | 9.905<br>E-01 | 0.938 | 0.265 | 2.121 |
| k_Bacteria;p_Actinobacteria;c_Thermoleophilia;o_Gaiellales;f__;g__;s__                                           | 359 | 453 | 9.905<br>E-01 | 1.009 | 0.876 | 1.155 |
| k_Bacteria;p_Proteobacteria;c_Alphaproteobacteria;o_Rhizobiales;f_Hyphomicrobiaceae;g_Pedomicrobium;s__          | 452 | 454 | 9.905<br>E-01 | 1.025 | 0.693 | 1.469 |
| k_Bacteria;p_Proteobacteria;c_TA18;o_PHOS-HD29;f__;g__;s__                                                       | 70  | 455 | 9.905<br>E-01 | 0.988 | 0.822 | 1.178 |
| k_Bacteria;p_Proteobacteria;c_Alphaproteobacteria;o_Rhodospirillales;f_Acetobacteraceae;g__;s__                  | 59  | 456 | 9.905<br>E-01 | 1.008 | 0.883 | 1.147 |
| k_Bacteria;p_Actinobacteria;c_Actinobacteria;o_Bifidobacteriales;f_Bifidobacteriaceae;g__;s__                    | 312 | 457 | 9.905<br>E-01 | 1.010 | 0.860 | 1.177 |
| k_Bacteria;p_Proteobacteria;c_Betaproteobacteria;o_Neisseriales;f_Neisseriaceae;g_Eikenella;s__                  | 225 | 458 | 9.905<br>E-01 | 0.982 | 0.715 | 1.308 |
| k_Bacteria;p_Bacteroidetes;c_Bacteroidia;o_Bacteroidales;f_Porphyrimonadaceae;g_Tannerella;s__                   | 369 | 459 | 9.905<br>E-01 | 0.956 | 0.338 | 1.986 |
| k_Bacteria;p_Proteobacteria;c_Deltaproteobacteria;o_NKB15;f__;g__;s__                                            | 482 | 460 | 9.905<br>E-01 | 0.984 | 0.737 | 1.287 |
| k_Bacteria;p_Actinobacteria;c_Actinobacteria;o_Actinomycetales;f_Micrococcaceae;g_Micrococcus;s__                | 50  | 461 | 9.905<br>E-01 | 1.012 | 0.827 | 1.239 |



|                                                                                                                       |     |     |               |              |       |                      |
|-----------------------------------------------------------------------------------------------------------------------|-----|-----|---------------|--------------|-------|----------------------|
| k_Bacteria;p_Firmicutes;c_Clostridia;o_Clostridiales;f_Lachnospiraceae;g_Shuttleworthia;s__                           | 423 | 462 | 9.905<br>E-01 | 0.978        | 0.626 | 1.434                |
| k_Bacteria;p_Acidobacteria;c_DA052;o_Ellin6513;f__;g__;s__                                                            | 341 | 463 | 9.905<br>E-01 | 1.028        | 0.531 | 1.747                |
| k_Bacteria;p_Proteobacteria;c_Alphaproteobacteria;o_Rhizobiales;f_Methylobacteriaceae;g_Methylobacterium;s_adhaesivum | 227 | 464 | 9.905<br>E-01 | 0.993        | 0.860 | 1.139                |
| k_Bacteria;p_WS6;c_SC72;o_WCHB1-15;f__;g__;s__                                                                        | 515 | 465 | 9.905<br>E-01 | 0.986        | 0.731 | 1.303                |
| k_Bacteria;p_Actinobacteria;c_Actinobacteria;o_Actinomycetales;f_Nocardioidaceae;g_Aeromicrobium;s__                  | 94  | 466 | 9.905<br>E-01 | 1.008        | 0.855 | 1.177                |
| k_Bacteria;p_Firmicutes;c_Bacilli;o_Lactobacillales;f_Lactobacillaceae;g__;s__                                        | 412 | 467 | 9.905<br>E-01 | 1.021        | 0.582 | 1.627                |
| k_Bacteria;p_Proteobacteria;c_Alphaproteobacteria;o_Caulobacterales;f_Caulobacteraceae;g_Mycoplana;s__                | 230 | 468 | 9.905<br>E-01 | 1.007        | 0.853 | 1.181                |
| k_Bacteria;p_Fusobacteria;c_Fusobacteriia;o_Fusobacteriales;f_Leptotrichiaceae;g_Leptotrichia;s__                     | 85  | 469 | 9.905<br>E-01 | 0.997        | 0.911 | 1.089                |
| k_Bacteria;p_Proteobacteria;c_Alphaproteobacteria;o_Rhizobiales;f_Bradyrhizobiaceae;g_Bradyrhizobium;s__              | 173 | 470 | 9.905<br>E-01 | 0.994        | 0.806 | 1.226                |
| k_Bacteria;p_Firmicutes;c_Clostridia;o_Clostridiales;f_Veillonellaceae;g_Selenomonas;s__                              | 172 | 471 | 9.905<br>E-01 | 0.997        | 0.891 | 1.111                |
| k_Bacteria;p_Bacteroidetes;c_Flavobacteriia;o_Flavobacteriales;f_[Weeksellaceae];g_Wautersiella;s__                   | 292 | 472 | 9.905<br>E-01 | 0.993        | 0.616 | 1.512                |
| k_Bacteria;p_Firmicutes;c_Bacilli;o_Lactobacillales;f_Streptococcaceae;g_Streptococcus;s_sobrinus                     | 548 | 473 | 9.905<br>E-01 | 0.000        | NA    | 22088<br>0.319       |
| k_Bacteria;p_Chloroflexi;c_Anaerolineae;o_H39;f__;g__;s__                                                             | 388 | 474 | 9.905<br>E-01 | 2719.<br>537 | 0.000 | NA                   |
| k_Bacteria;p_Firmicutes;c_Clostridia;o_Clostridiales;f_Christensenellaceae;g__;s__                                    | 420 | 475 | 9.905<br>E-01 | 18.38<br>6   | 0.000 | NA                   |
| k_Bacteria;p_Synergistetes;c_Synergistia;o_Synergistales;f_Dethiosulfovibrionaceae;g_Pyramidobacter;s_piscicolens     | 539 | 476 | 9.905<br>E-01 | 18.76<br>6   | 0.003 | NA                   |
| k_Bacteria;p_Firmicutes;c_Bacilli;o_Lactobacillales;f_Lactobacillaceae;g_Pediococcus;s__                              | 413 | 477 | 9.905<br>E-01 | 9.553        | 0.000 | NA                   |
| k_Bacteria;p_GN02;c_GKS2-174;o__;f__;g__;s__                                                                          | 435 | 478 | 9.905<br>E-01 | 69.41<br>7   | 0.000 | NA                   |
| k_Bacteria;p_Firmicutes;c_Bacilli;o_Bacillales;f_Staphylococcaceae;g_Jeotgaliococcus;s_psychrophilus                  | 541 | 479 | 9.905<br>E-01 | 0.000        | NA    | NA                   |
| k_Bacteria;p_Actinobacteria;c_Actinobacteria;o_Actinomycetales;f_Dietziaceae;g_Dietzia;s__                            | 318 | 480 | 9.905<br>E-01 | 0.000        | NA    | 12060<br>3.867       |
| k_Bacteria;p_Spirochaetes;c_Spirochaetes;o_Sphaerochaetales;f_Sphaerochaetaceae;g_Sphaerochaeta;s__                   | 509 | 481 | 9.905<br>E-01 | 27.36<br>9   | 0.005 | NA                   |
| k_Bacteria;p_Proteobacteria;c_Gammaproteobacteria;o_Aeromonadales;f_Aeromonadaceae;g_Tolumonas;s__                    | 489 | 482 | 9.905<br>E-01 | 0.021        | NA    | 5711.<br>099         |
| k_Bacteria;p_GN02;c_BD1-5;o__;f__;g__;s__                                                                             | 434 | 483 | 9.905<br>E-01 | 0.001        | NA    | NA                   |
| k_Bacteria;p_Gemmatimonadetes;c_Gemmatimonadetes;o__;f__;g__;s__                                                      | 432 | 484 | 9.905<br>E-01 | 0.033        | NA    | NA                   |
| k_Bacteria;p_Bacteroidetes;c_Bacteroidia;o_Bacteroidales;f_S24-7;g__;s__                                              | 370 | 485 | 9.905<br>E-01 | 0.043        | NA    | NA                   |
| k_Bacteria;p_Proteobacteria;c_Alphaproteobacteria;o_Rhizobiales;f_Hyphomicrobiaceae;g_Parvibaculum;s__                | 451 | 486 | 9.905<br>E-01 | 0.088        | NA    | 27507<br>934.8<br>20 |
| k_Bacteria;p_Synergistetes;c_Synergistia;o_Synergistales;f_Dethiosulfovibrionaceae;g_Jonquetella;s_anthropi           | 518 | 487 | 9.905<br>E-01 | 0.084        | NA    | 36656<br>530.9<br>30 |
| k_Bacteria;p_Chloroflexi;c_Anaerolineae;o_Anaerolineales;f_Anaerolinaceae;g_Anaerolinea;s__                           | 385 | 488 | 9.905<br>E-01 | 0.046        | NA    | NA                   |
| k_Bacteria;p_Proteobacteria;c_Gammaproteobacteria;o_Oceanospirillales;f_Halomonadaceae;g__;s__                        | 505 | 489 | 9.905<br>E-01 | 0.075        | NA    | NA                   |
| k_Bacteria;p_Firmicutes;c_Bacilli;o_Lactobacillales;f_Leuconostocaceae;g_Weissella;s__                                | 415 | 490 | 9.905<br>E-01 | 0.000        | NA    | NA                   |
| k_Bacteria;p_Proteobacteria;c_Deltaproteobacteria;o_Syntrophobacterales;f_Syntrophaceae;g_Desulfomonile;s__           | 484 | 491 | 9.905<br>E-01 | 0.001        | 0.000 | 2851.<br>329         |

|                                                                                                                     |     |     |               |            |       |                      |
|---------------------------------------------------------------------------------------------------------------------|-----|-----|---------------|------------|-------|----------------------|
| k_Bacteria;p_Firmicutes;c_Clostridia;o_Clostridiales;f_Veillonellaceae;g_Schwartzia;s__                             | 426 | 492 | 9.905<br>E-01 | 78.63<br>4 | 0.000 | NA                   |
| k_Bacteria;p_Proteobacteria;c_Alphaproteobacteria;o_Sphingomonadales;f_Sphingomonadaceae;g_Sphingomonas;s_wittichii | 552 | 493 | 9.905<br>E-01 | 0.000      | NA    | NA                   |
| k_Bacteria;p_Aquificae;c_Aquificae;o_Aquificales;f_Aquificaceae;g__;s__                                             | 362 | 494 | 9.905<br>E-01 | 0.000      | NA    | NA                   |
| k_Bacteria;p_Actinobacteria;c_Actinobacteria;o_Actinomycetales;f_Pseudonocardiaceae;g_Actinomycetospora;s__         | 210 | 495 | 9.905<br>E-01 | 0.000      | 0.000 | 19998<br>2.076       |
| k_Bacteria;p_Chloroflexi;c_Chloroflexi;o_[Roseiflexales];f_[Kouleothrixaceae];g_Kouleothrix;s__                     | 390 | 496 | 9.905<br>E-01 | 35.32<br>4 | 0.000 | NA                   |
| k_Bacteria;p_WS3;c_PRR-12;o_Sediment-1;f_PRR-10;g__;s__                                                             | 514 | 497 | 9.905<br>E-01 | 77.37<br>2 | 0.000 | NA                   |
| k_Bacteria;p_Proteobacteria;c_Gammaproteobacteria;o_Alteromonadales;f_OM60;g__;s__                                  | 491 | 498 | 9.905<br>E-01 | 86.22<br>1 | 0.000 | NA                   |
| k_Bacteria;p_Proteobacteria;c_Deltaproteobacteria;o_NB1-j;f_JTB38;g__;s__                                           | 481 | 499 | 9.905<br>E-01 | 47.26<br>7 | 0.000 | NA                   |
| k_Bacteria;p_Proteobacteria;c_Deltaproteobacteria;o_FAC87;f__;g__;s__                                               | 477 | 500 | 9.905<br>E-01 | 46.12<br>4 | 0.000 | NA                   |
| k_Bacteria;p_Gemmatimonadetes;c_Gemm-1;o__;f__;g__;s__                                                              | 430 | 501 | 9.905<br>E-01 | 41.33<br>5 | 0.000 | NA                   |
| k_Bacteria;p_Planctomycetes;c_C6;o_d113;f__;g__;s__                                                                 | 442 | 502 | 9.905<br>E-01 | 51.18<br>5 | 0.000 | NA                   |
| k_Bacteria;p_Chloroflexi;c_Chloroflexi;o_AKIW781;f__;g__;s__                                                        | 391 | 503 | 9.905<br>E-01 | 0.038      | NA    | 58531<br>943.3<br>10 |
| k_Bacteria;p_Chlamydiae;c_Chlamydia;o_Chlamydiales;f_Parachlamydiaceae;g_Parachlamydia;s__                          | 380 | 504 | 9.905<br>E-01 | 0.007      | NA    | NA                   |
| k_Bacteria;p_Proteobacteria;c_Deltaproteobacteria;o_Syntrophobacterales;f_Syntrophorhabdaceae;g__;s__               | 485 | 505 | 9.905<br>E-01 | 0.007      | NA    | NA                   |
| k_Bacteria;p_Cyanobacteria;c_Oscillatoriothricaceae;o_Chroococcales;f_Cyanobacteriaceae;g_Cyanobacterium;s__        | 398 | 506 | 9.905<br>E-01 | 0.008      | NA    | 96840<br>309.2<br>40 |
| k_Bacteria;p_Proteobacteria;c_Gammaproteobacteria;o_Legionellales;f_Legionellaceae;g_Tatlockia;s__                  | 503 | 507 | 9.905<br>E-01 | 0.011      | NA    | 21006<br>759.3<br>60 |
| k_Bacteria;p_Chlamydiae;c_Chlamydia;o_Chlamydiales;f_Rhabdochlamydiaceae;g_CandidatusRhabdochlamydia;s__            | 381 | 508 | 9.905<br>E-01 | 0.034      | NA    | 32986<br>9.646       |
| k_Bacteria;p_Fusobacteria;c_Fusobacteriia;o_Fusobacteriales;f__;g__;s__                                             | 428 | 509 | 9.905<br>E-01 | 0.004      | NA    | NA                   |
| k_Bacteria;p_Actinobacteria;c_Actinobacteria;o_Actinomycetales;f_Kineosporiaceae;g_Kineococcus;s__                  | 348 | 510 | 9.905<br>E-01 | 0.000      | NA    | NA                   |
| k_Bacteria;p_Armatimonadetes;c_[Fimbriimonadia];o_[Fimbriimonadales];f_[Fimbriimonadaceae];g_Fimbriimonas;s__       | 363 | 511 | 9.905<br>E-01 | 0.000      | NA    | NA                   |
| k_Bacteria;p_OD1;c_SM2F11;o__;f__;g__;s__                                                                           | 440 | 512 | 9.905<br>E-01 | 0.070      | NA    | 66252<br>4.372       |
| k_Bacteria;p_OD1;c_ABY1;o__;f__;g__;s__                                                                             | 439 | 513 | 9.905<br>E-01 | 0.027      | NA    | 80027<br>541.2<br>10 |
| k_Bacteria;p_Bacteroidetes;c_Bacteroidia;o_Bacteroidales;f_BA008;g__;s__                                            | 366 | 514 | 9.905<br>E-01 | 0.036      | NA    | 20653<br>084.2<br>20 |
| k_Bacteria;p_Chlorobi;c_Ignavibacteria;o_Ignavibacteriales;f_Ignavibacteriaceae;g__;s__                             | 382 | 515 | 9.905<br>E-01 | 0.042      | NA    | 92895<br>30.49<br>4  |
| k_Bacteria;p_Cyanobacteria;c_4C0d-2;o_SM1D11;f__;g__;s__                                                            | 394 | 516 | 9.905<br>E-01 | 0.042      | NA    | 92895<br>30.49<br>4  |
| k_Bacteria;p_Proteobacteria;c_Gammaproteobacteria;o_Chromatiales;f_Chromatiaceae;g_Allochromatium;s__               | 492 | 517 | 9.905<br>E-01 | 0.057      | NA    | 19859<br>86.74<br>2  |
| k_Bacteria;p_Firmicutes;c_Clostridia;o_Clostridiales;f_Veillonellaceae;g_vadinHB04;s__                              | 427 | 518 | 9.905<br>E-01 | 0.023      | NA    | NA                   |
| k_Bacteria;p_Proteobacteria;c_Deltaproteobacteria;o_MIZ46;f__;g__;s__                                               | 478 | 519 | 9.905<br>E-01 | 0.020      | NA    | NA                   |

|                                                                                                                                  |     |     |            |         |       |                |
|----------------------------------------------------------------------------------------------------------------------------------|-----|-----|------------|---------|-------|----------------|
| k__Bacteria;p__Proteobacteria;c__Gammaproteobacteria;o__Legionellales;f__Francisellaceae;g__s__                                  | 501 | 520 | 9.905 E-01 | 0.015   | NA    | NA             |
| k__Bacteria;p__Proteobacteria;c__Deltaproteobacteria;o__Bdellovibrionales;f__Bdellovibrionaceae;g__Bdellovibrio;s__bacteriovorus | 520 | 521 | 9.905 E-01 | 0.044   | NA    | 67463 94.79 4  |
| k__Bacteria;p__Proteobacteria;c__Betaproteobacteria;o__f__g__s__                                                                 | 461 | 522 | 9.905 E-01 | 0.027   | NA    | 89335 300.2 20 |
| k__Bacteria;p__Proteobacteria;c__Gammaproteobacteria;o__Chromatiales;f__Halothiobacillaceae;g__Thiovirga;s__                     | 493 | 523 | 9.905 E-01 | 0.058   | NA    | 16841 14.10 3  |
| k__Bacteria;p__Proteobacteria;c__Deltaproteobacteria;o__Myxococcales;f__Polyangiaceae;g__s__                                     | 480 | 524 | 9.905 E-01 | NA      | 0.000 | NA             |
| k__Bacteria;p__Firmicutes;c__Bacilli;o__Lactobacillales;f__Aerococcaceae;g__Marinilactibacillus;s__psychrotolerans               | 542 | 525 | 9.905 E-01 | 0.004   | NA    | NA             |
| k__Bacteria;p__Proteobacteria;c__Alphaproteobacteria;o__Caulobacterales;f__Caulobacteraceae;g__Arthrospira;s__                   | 448 | 526 | 9.905 E-01 | 0.000   | NA    | NA             |
| k__Bacteria;p__Acidobacteria;c__Holophagae;o__Holophagales;f__Holophagaceae;g__Geothrix;s__                                      | 342 | 527 | 9.905 E-01 | 0.003   | NA    | 48283 753.3 30 |
| k__Bacteria;p__Bacteroidetes;c__Bacteroidia;o__Bacteroidales;f__Porphyromonadaceae;g__s__                                        | 367 | 528 | 9.905 E-01 | 0.000   | NA    | NA             |
| k__Bacteria;p__Firmicutes;c__o__f__g__s__                                                                                        | 401 | 529 | 9.905 E-01 | 0.000   | NA    | NA             |
| k__Bacteria;p__Proteobacteria;c__Betaproteobacteria;o__Neisseriales;f__Neisseriaceae;g__Microvirgula;s__                         | 468 | 530 | 9.905 E-01 | 0.000   | NA    | NA             |
| k__Bacteria;p__Proteobacteria;c__Gammaproteobacteria;o__f__g__s__                                                                | 488 | 531 | 9.905 E-01 | 0.000   | NA    | NA             |
| k__Bacteria;p__OP11;c__WCHB1-64;o__d153;f__g__s__                                                                                | 441 | 532 | 9.905 E-01 | 0.009   | NA    | NA             |
| k__Bacteria;p__Firmicutes;c__Clostridia;o__Clostridiales;f__[Tissierellaceae];g__s__                                             | 417 | 533 | 9.905 E-01 | 0.015   | NA    | NA             |
| k__Bacteria;p__Proteobacteria;c__Gammaproteobacteria;o__Pseudomonadales;f__Moraxellaceae;g__Acinetobacter;s__schindleri          | 545 | 534 | 9.905 E-01 | 0.000   | NA    | NA             |
| k__Bacteria;p__Proteobacteria;c__Gammaproteobacteria;o__Enterobacteriales;f__Enterobacteriaceae;g__Yersinia;s__                  | 496 | 535 | 9.905 E-01 | 0.000   | NA    | NA             |
| k__Bacteria;p__Proteobacteria;c__Gammaproteobacteria;o__HOC36;f__g__s__                                                          | 497 | 536 | 9.905 E-01 | 0.009   | NA    | 18524 743.6 60 |
| k__Bacteria;p__Cyanobacteria;c__Oscillatorioophycideae;o__Oscillatoriales;f__Phormidiaceae;g__Phormidium;s__                     | 399 | 537 | 9.905 E-01 | 0.001   | NA    | NA             |
| k__Bacteria;p__Firmicutes;c__Bacilli;o__Lactobacillales;f__Carnobacteriaceae;g__Trichococcus;s__                                 | 410 | 538 | 9.905 E-01 | 14.19 3 | 0.000 | NA             |
| k__Bacteria;p__Proteobacteria;c__Epsilonproteobacteria;o__Campylobacteriales;f__Campylobacteraceae;g__Sulfurospirillum;s__       | 486 | 539 | 9.905 E-01 | 0.000   | NA    | NA             |
| k__Bacteria;p__Firmicutes;c__Clostridia;o__Clostridiales;f__Veillonellaceae;g__Anaeromusa;s__                                    | 425 | 540 | 9.905 E-01 | 0.000   | NA    | NA             |
| k__Bacteria;p__Planctomycetes;c__Phycisphaerae;o__Phycisphaerales;f__g__s__                                                      | 443 | 541 | 9.905 E-01 | 0.102   | NA    | NA             |
| k__Bacteria;p__Proteobacteria;c__Deltaproteobacteria;o__Myxococcales;f__OM27;g__s__                                              | 479 | 542 | 9.905 E-01 | 0.000   | NA    | NA             |
| k__Bacteria;p__Planctomycetes;c__Phycisphaerae;o__WD2101;f__g__s__                                                               | 444 | 543 | 9.905 E-01 | 0.000   | NA    | NA             |
| k__Bacteria;p__Firmicutes;c__Bacilli;o__Lactobacillales;f__Aerococcaceae;g__Alkalibacterium;s__                                  | 409 | 544 | 9.905 E-01 | 0.000   | NA    | NA             |
| k__Bacteria;p__Bacteroidetes;c__Flavobacteriia;o__Flavobacteriales;f__Flavobacteriaceae;g__Myroides;s__                          | 376 | 545 | 9.905 E-01 | 0.000   | NA    | NA             |
| k__Bacteria;p__Bacteroidetes;c__Cytophagia;o__Cytophagales;f__Cytophagaceae;g__Rhodocytophaga;s__                                | 372 | 546 | 9.905 E-01 | 0.092   | NA    | NA             |
| k__Bacteria;p__Cyanobacteria;c__Synechococcophycideae;o__Pseudanabaenales;f__g__s__                                              | 400 | 547 | 9.905 E-01 | 0.057   | NA    | NA             |
| k__Bacteria;p__Firmicutes;c__Bacilli;o__Lactobacillales;f__Lactobacillaceae;g__Lactobacillus;s__iners                            | 150 | 548 | 9.905 E-01 | 0.999   | 0.861 | 1.154          |

|                                                                                                                       |     |     |               |       |       |       |
|-----------------------------------------------------------------------------------------------------------------------|-----|-----|---------------|-------|-------|-------|
| k__Bacteria;p__Verrucomicrobia;c__[Spartobacteria];o__[Chthoniobacterales];f__[Chthoniobacteraceae];g__DA101;s__      | 513 | 549 | 9.905<br>E-01 | 0.071 | NA    | NA    |
| k__Bacteria;p__Proteobacteria;c__Gammaproteobacteria;o__Enterobacterales;f__Enterobacteriaceae;g__Buchnera;s__        | 494 | 550 | 9.905<br>E-01 | 0.040 | NA    | NA    |
| k__Bacteria;p__Bacteroidetes;c__Flavobacteriia;o__Flavobacteriales;f__Cryomorphaceae;g__Fluviicola;s__                | 374 | 551 | 9.905<br>E-01 | 0.052 | NA    | NA    |
| k__Bacteria;p__Proteobacteria;c__Alphaproteobacteria;o__Rhodobacterales;f__Rhodobacteraceae;g__Amaricoccus;s__        | 289 | 552 | 9.916<br>E-01 | 1.003 | 0.633 | 1.503 |
| k__Bacteria;p__Proteobacteria;c__Betaproteobacteria;o__Burkholderiales;f__Comamonadaceae;g__Acidovorax;s__delafieldii | 167 | 553 | 9.984<br>E-01 | 1.000 | 0.784 | 1.249 |

**eTable 3.** Association of Individual Taxa and Cluster Class With Composite Infectious Outcome

| <b>Variables</b>                    | <b>Unadjusted Odds Ratio</b> | <b>P value</b> | <b>Adjusted Odds Ratio</b> | <b>P value</b> |
|-------------------------------------|------------------------------|----------------|----------------------------|----------------|
| <i>Moraxella spp.</i>               | 1.17 (1.05,1.29)             | 0.003          | 1.16 (1.00,1.34)           | 0.04           |
| <i>Propionibacterium granulosum</i> | 0.86 (0.79,0.94)             | 0.001          | 0.91 (0.79,1.06)           | 0.25           |
| <i>Novosphingobium spp.</i>         | 1.16 (1.10,1.24)             | <0.001         | 1.13 (1.05,1.23)           | 0.001          |
| <i>Anaerococcus spp.</i>            | 0.71 (0.59,0.86)             | <0.001         | 0.43 (0.31,0.57)           | <0.001         |
| <i>Propionibacterium spp.</i>       | 1.19 (1.06,1.33)             | 0.002          | 0.98 (0.83,1.15)           | 0.87           |
| <i>Atopobium spp.</i>               | 0.70 (0.58,0.85)             | <0.001         | 0.69 (0.53,0.89)           | 0.005          |
| <i>Parvimonas spp.</i>              | 0.86 (0.79,0.94)             | <0.001         | 0.94 (0.82,1.07)           | 0.36           |
| Cluster 2 probability               | 6.18 (3.30,11.7)             | <0.001         | 6.71 (2.91,15.84)          | <0.001         |

**eFigure 1.** Taxonomic Classification of 16S rRNA Gene Sequences Identified From Preoperative Nasal Swabs

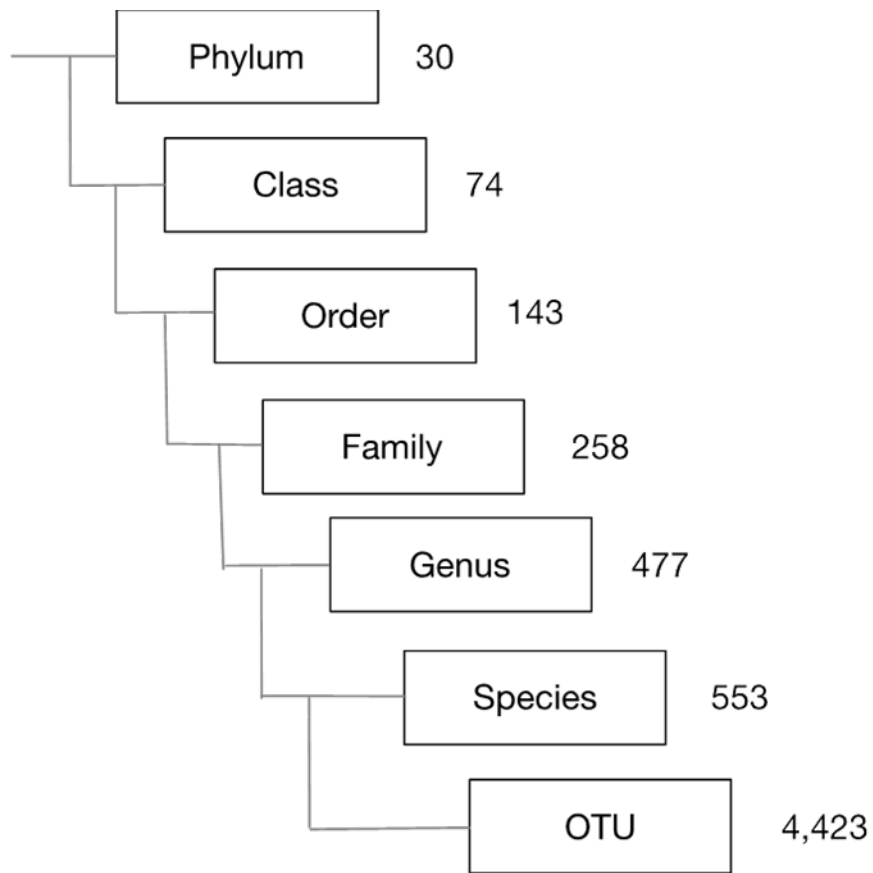

Numbers of uniquely annotated taxa against the Greengenes database within each clade identified from 4,423 operational taxonomic units (OTUs).

**eFigure 2.** Violin Plots of Variance Associated With Microbiome Cluster

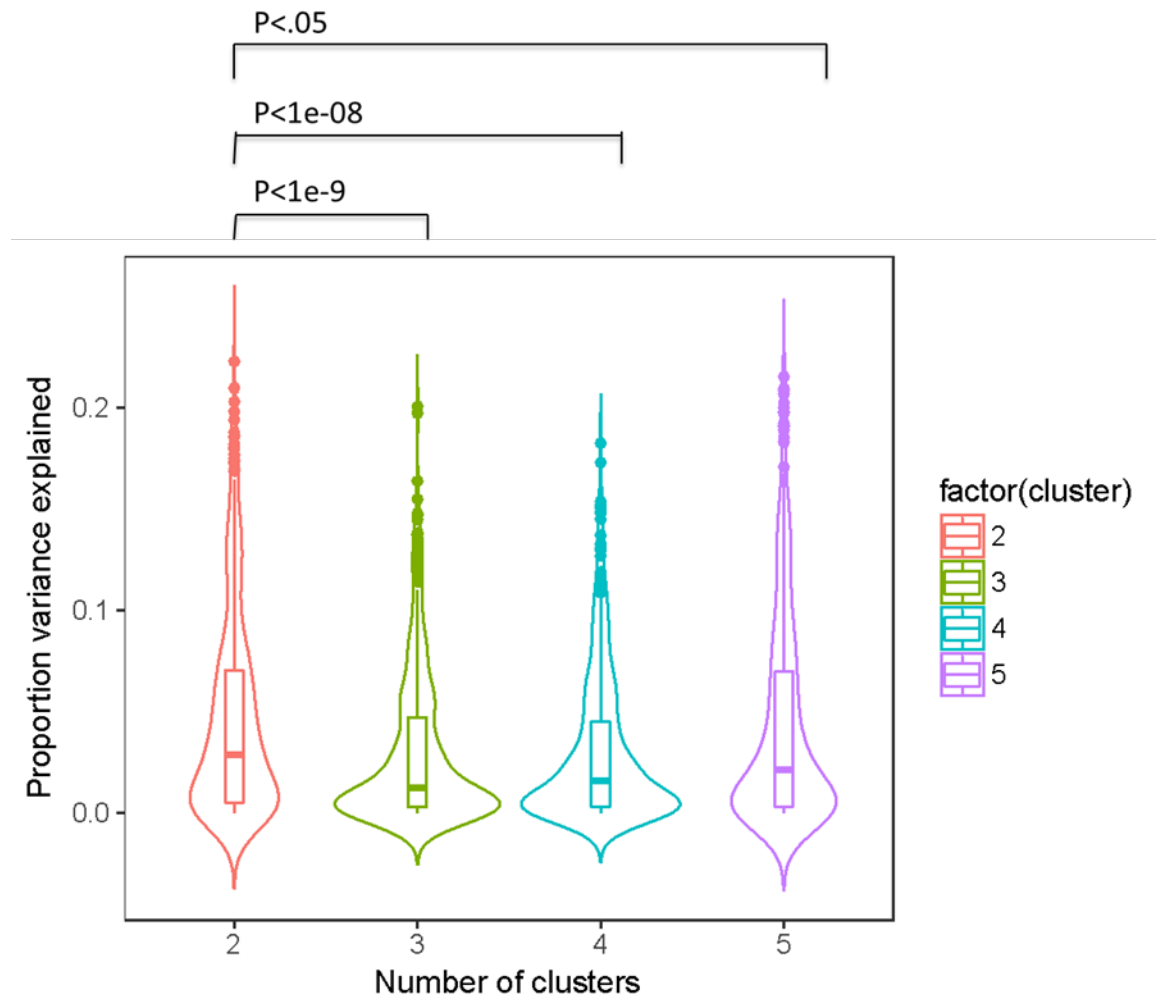

Along the abscissa are the number of clusters defined from  $K = 2$  to  $K = 5$ . The ordinate represents the variance explained by cluster (within to between sum of squares). Cluster of  $K = 2$  has the greatest (median) variability explained in comparison to other cluster representations and is the most parsimonious.

**eFigure 3.** Diversity Characterization of Nasal Microbiota by Cluster Class

**eFigure 3A.** Microbiome diversity metrics by cluster class: Alpha (Shannon) diversity

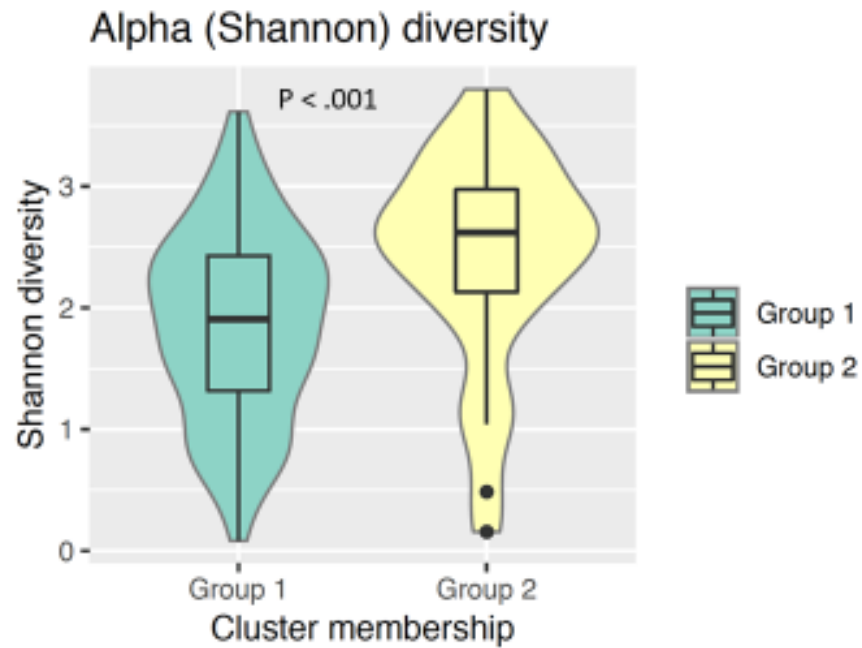

eFigure 3A shows violin plots describing sample Shannon diversity in each of the microbiome clusters. There is significantly less diversity within cluster1 (Group 1) compared to cluster2 (Group 2).



eFigure 3B. Microbiome diversity metrics by cluster class: Beta diversity

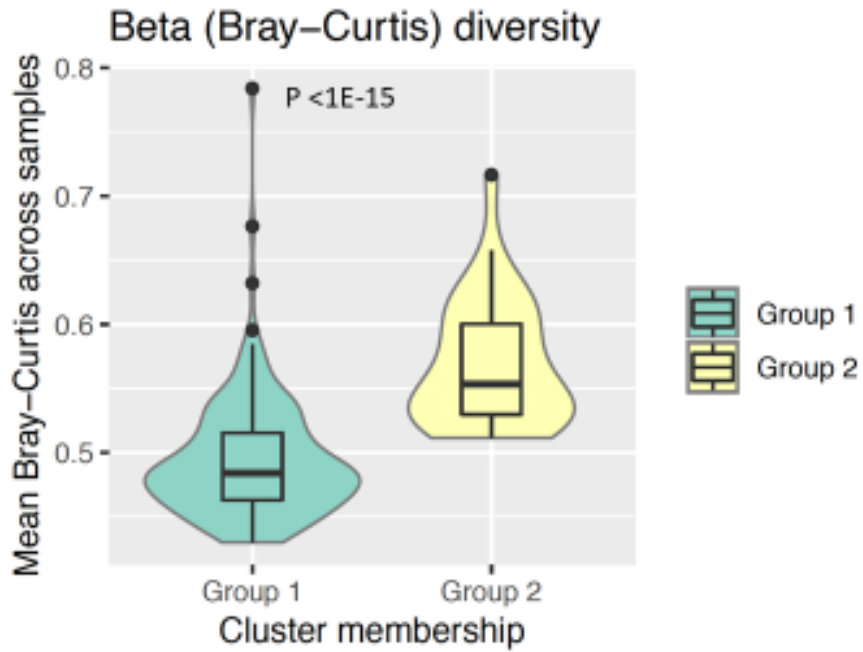

eFigure 3B shows violin plots describing the average Bray-Curtis distance (beta diversity) for each sample within by microbiome cluster. Cluster1 (Group 1) is a significantly more homogeneous (less diverse) than cluster2.

eFigure 3C. Microbiome diversity metrics by cluster class:  
Principal Components Analysis

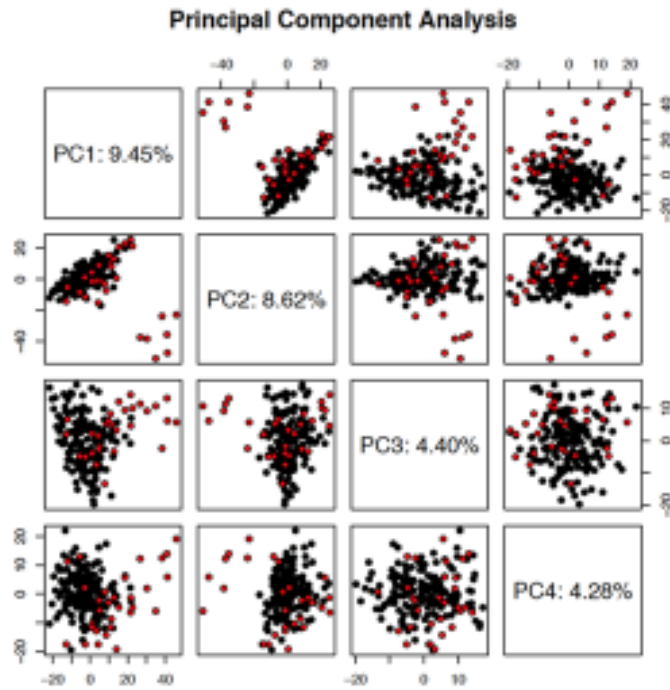

eFigure 3C is a pairwise scatterplot of the first through fourth principal components. Each point represents an individual patient sample, black= cluster1 (Group 1) and red= cluster2 (Group 2); proportion of variance explained by each principal component (PC) shown (%).
